# Supplementary material for: Total synthesis of pseudouridimycin and its epimer via Ugi-type multicomponent reaction
Source: Royal Society of Chemistry journal article supplement (doi:10.1039/d2cc02442j), 2022-01-01
Supplement: d2cc02442j1.pdf [file d2cc02442j1.pdf]

## Electronic Supplementary Information

# Total Synthesis of Pseudouridimycin and Its Epimer via Ugi-type Multicomponent Reaction

Ryotaro Okawa,<sup>1</sup> Courtney C. Aldrich,<sup>2,3</sup> and Satoshi Ichikawa<sup>\*1,2,4</sup>

<sup>1</sup>Faculty of Pharmaceutical Sciences, Hokkaido University, Kita-12, Nishi-6, Kita-ku, Sapporo 060-0812, Japan

<sup>2</sup>Global Station for Biosurfaces and Drug Discovery, Global Institution for Collaborative Research and Education (GI-CoRE), Hokkaido University, Kita-12, Nishi-6, Kita-ku, Sapporo 060-0812, Japan

<sup>3</sup>Department of Medicinal Chemistry, Minnesota University, 8-123 Weaver-Densford Hall 308 Harvard St. SE, Minneapolis, MN 55455, USA

<sup>4</sup>Center for Research and Education on Drug Discovery, Faculty of Pharmaceutical Sciences, Hokkaido University, Kita-12, Nishi-6, Kita-ku, Sapporo 060-0812, Japan

### Table of Contents

|                                                                                                                                                                            |         |
|----------------------------------------------------------------------------------------------------------------------------------------------------------------------------|---------|
| 1) General experimental methods                                                                                                                                            | S2      |
| 2) Preparation of compounds                                                                                                                                                | S3-S10  |
| 3) NMR spectrum of synthesized compounds                                                                                                                                   | S11-S43 |
| 4) Reaction mechanism of Ugi multicomponent reaction                                                                                                                       | S44     |
| 5) Marfey's analysis of compound 15 and 16                                                                                                                                 | S45     |
| 6) Comparison of <sup>1</sup> H NMR and <sup>13</sup> C NMR charts of natural and synthetic pseudouridimycin                                                               | S46-S47 |
| 7) Comparison of <sup>1</sup> H NMR and <sup>19</sup> F NMR charts of two types of pseudopuridimycin and <i>epi</i> -pseudouridimycin salts (DMSO- <i>d</i> <sub>6</sub> ) | S48-S49 |
| 8) LR-MS and HR-MS charts of synthesized compounds                                                                                                                         | S50-S79 |
| 9) The IR spectrum of isocyanide 10                                                                                                                                        | S80     |

## General experimental methods

All reactions except that carried out in aqueous phase were performed under argon atmosphere, unless otherwise noted. Materials were purchased from commercial suppliers and used without further purification, unless otherwise noted. Solvents were distilled according to the standard protocol. Isolated yields were calculated by weighing products. The weight of the starting materials and the products were not calibrated. Analytical thin layer chromatography (TLC) was performed on Merck silica gel 60F<sub>254</sub> plates. Normal-phase column chromatography was performed on Merck silica gel 5715 or Wakogel 60N. Flash column chromatography was performed on Kanto Chemical Silica Gel 60N (spherical, neutral, 40-50  $\mu\text{m}$ ). Hi-flash column chromatography was performed on YAMAZEN Hi-Flash<sup>TM</sup> column silica gel (40  $\mu\text{m}$ ) or Fuji Silysia Chromatorex MB/PSQ (50-200  $\mu\text{m}$ ). Preparative thin-layer chromatography was performed on sigmaaldrich TLC Silica gel 60 F<sub>254</sub> 25 Glass plates 20 $\times$ 20 cm. <sup>1</sup>H NMR spectra were measured in CDCl<sub>3</sub> or DMSO-*d*<sub>6</sub> solution and reported in parts per million ( $\delta$ ) relative to tetramethylsilane (0.00 ppm) as internal standard or residual solvent peaks of DMSO-*d*<sub>6</sub> (2.50 ppm) using JEOL ECS400 and ECX400P, unless otherwise noted. <sup>13</sup>C NMR spectra were measured in CDCl<sub>3</sub> or DMSO-*d*<sub>6</sub> solution and referenced to residual solvent peaks of CDCl<sub>3</sub> (77.0 ppm) or DMSO-*d*<sub>6</sub> (39.5 ppm) using JEOL ECS400 and ECX400P. Coupling constant (*J*) was reported in hertz (Hz). Abbreviations of multiplicity were as follows; s: singlet, d; doublet, t: triplet, q: quartet, m: multiplet, br: broad. Data were presented as follows; chemical shift (multiplicity, integration, coupling constant). Assignment was based on <sup>1</sup>H-<sup>1</sup>H COSY, HMBC and HMQC NMR spectra. Mass spectra were obtained on Waters MICRO MASS LCT-premier and the mass analyzer type used for the HRMS measurements was TOF. Optical rotation was measured on a Rudolph Research Analytical Autopol IV automatic polarimeter.

## 1) Preparation of compounds

### 2',3'-Di-*O*-*tert*-butyldimethylsilyl- 5'-deoxy-5'-*N*-formylaminopseudouridine (9)

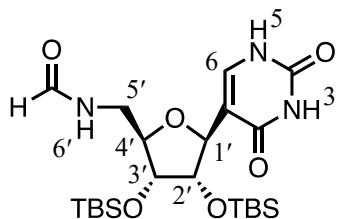

**Preparation by route A.** A suspension of pseudouridine (**6**, 3.00 g, 12.3 mmol) and imidazole (6.69 g, 98.3 mmol) in DMF was treated with *tert*-butyldimethylsilyl chloride (7.41 g, 49.1 mmol) at 50 °C for 20 h. Further imidazole (1.67 g, 24.6 mol) and *tert*-butyldimethylsilyl chloride (1.85 g, 12.3 mmol) were added to the reaction mixture, which was stirred for 24

h. The resulting mixture was concentrated *in vacuo* to give a crude 2',3',5'-tri-*O*-*tert*-butyldimethylsilylpseudouridine. 50% TFA/H<sub>2</sub>O (65 mL) was slowly added to a solution of the residue in THF (130 mL) at 0 °C, and the mixture was stirred for 3.5 h. The resulting mixture was diluted with H<sub>2</sub>O (50 mL) and extracted with AcOEt (100 mL × 3). The organic phase was washed with brine (80 mL), dried (Na<sub>2</sub>SO<sub>4</sub>), filtered, and concentrated *in vacuo* to give a crude 2',3'-di-*O*-*tert*-butyldimethylsilylpseudouridine. A suspension of the residue in pyridine (100 mL) was treated with *p*-toluenesulfonyl chloride (5.86 g, 30.7 mmol) at 0 °C for 3 h. Further *p*-toluenesulfonyl chloride (2.93 g, 15.4 mmol) was added to the reaction mixture, which was stirred for further 3 h. The reaction mixture was quenched by adding cooled H<sub>2</sub>O (0 °C, 50 mL) and extracted with AcOEt (100 mL). The organic phase was washed with brine (100 mL), dried (Na<sub>2</sub>SO<sub>4</sub>), filtered, and concentrated *in vacuo* to give a crude 2',3'-di-*O*-*tert*-butyldimethylsilyl-5'-*O*-*p*-toluenesulfonylpseudouridine. A solution of the residue and NaN<sub>3</sub> (2.00 g, 30.7 mmol) in DMF (80 mL) was stirred at 70 °C for 10 h. Further NaN<sub>3</sub> (2.00 g, 30.7 mmol) was added to the reaction mixture, which was stirred for 22 h. The resulting mixture was cooled to room temperature and partitioned between hexane/AcOEt = 4/1 (200 mL) and H<sub>2</sub>O (80 mL). The organic phase was washed with brine (80 mL), dried (Na<sub>2</sub>SO<sub>4</sub>), filtered, and concentrated *in vacuo* to give a crude 5'-azido-2',3'-di-*O*-*tert*-butyldimethylsilyl-5'-deoxypseudouridine (**7**). A mixture of the residue and 5% Pd/C (1.00 g) in MeOH (40 mL) was vigorously stirred under H<sub>2</sub> atmosphere at 40 °C for 12 h. The catalyst was filtered off through a Celite pad, and the filtrate was concentrated *in vacuo* to give a crude 5'-amino-2',3'-di-*O*-*tert*-butyldimethylsilyl-5'-deoxypseudouridine (**8**). A suspension of the residue and EDCI·HCl (5.89 g, 30.7 mmol) in CH<sub>2</sub>Cl<sub>2</sub> (100 mL) was treated with formic acid (2.19 mL, 41.8 mmol) at 0 °C for 16 h. The reaction mixture was washed with H<sub>2</sub>O (30 mL) and brine (80 mL), dried (Na<sub>2</sub>SO<sub>4</sub>), filtered, and concentrated *in vacuo*. The residue was purified by silica gel column chromatography (ϕ 10.5 × 15 cm, CHCl<sub>3</sub>/MeOH: 100/0→99/1→98/2→97/3→96/4) to afford **9** (2.15 g, 4.30 mmol, 35% over 6 steps) as a white solid. <sup>1</sup>H NMR (DMSO-*d*<sub>6</sub>, 400 MHz) δ 11.14 (s, 1H, H3), 10.95 (s, 1H, H5), 8.18 (s, 1H, H6'), 8.05 (s, 1H, CHO), 7.49 (s, 1H, H6), 4.47 (d, 1H, H1', *J*<sub>1',2'</sub> = 5.6 Hz), 4.35 (dd, 1H, H2', *J*<sub>2',1'</sub> = 5.6, *J*<sub>2',3'</sub> = 4.2 Hz), 3.94 (dd, 1H, H3', *J*<sub>3',2'</sub> = 4.2, *J*<sub>3',4'</sub> = 4.0 Hz), 3.81-3.76 (m, 1H, H4'), 3.38-3.22 (m, 2H, H5'), 0.85 (s, 18H, Si(CH<sub>3</sub>)<sub>2</sub>C(CH<sub>3</sub>)<sub>3</sub>), 0.03 (s, 12H, Si(CH<sub>3</sub>)<sub>2</sub>C(CH<sub>3</sub>)<sub>3</sub>); <sup>13</sup>C NMR (DMSO-*d*<sub>6</sub>, 100 MHz) δ 163.6, 161.2, 151.2, 141.3, 109.5, 82.0, 79.3, 74.0, 74.0, 48.6, 25.8, 17.8, -4.68; ESIMS-LR



### 2',3'-Di-*O*-*tert*-butyldimethylsilyl-5'-*O*-*p*-toluenesulfonylpseudouridine

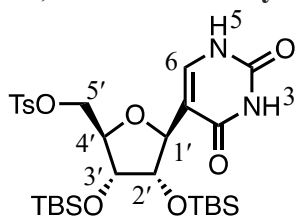

$^1\text{H}$  NMR (DMSO- $d_6$ , 400 MHz)  $\delta$  11.12 (s, 1H, H3), 10.99 (d, 1H, H5,  $J_{5,6}$  = 5.0 Hz), 7.81 (d, 2H, H-*o*-Ph,  $J_{o\text{-Ph},m\text{-Ph}}$  = 8.6 Hz), 7.49 (d, 2H, H-*m*-Ph,  $J_{m\text{-Ph},o\text{-Ph}}$  = 8.6 Hz), 7.32 (d, 1H, H6,  $J_{6,5}$  = 5.0 Hz), 4.44 (d, 1H, H1',  $J_{1',2'}$  = 5.0 Hz), 4.23 – 4.17 (m, 2H, H2', H5'), 4.10 (dd, 1H, H5',  $J_{5',4'}$  = 5.4,  $J_{5',5'}$  = 11.0 Hz), 3.93 (dd, 1H, H3',  $J_{3',2'}$  = 4.0,  $J_{3',4'}$  = 5.4 Hz), 3.85 (dd, 1H, H4',  $J_{4',3'}$  = 5.4,  $J_{4',5'}$  = 5.4 Hz), 2.42 (s, 3H, *p*-Me), 0.82 (s, 18H, Si(CH<sub>3</sub>)<sub>2</sub>C(CH<sub>3</sub>)<sub>3</sub>), 0.00 (s, 12H, Si(CH<sub>3</sub>)<sub>2</sub>C(CH<sub>3</sub>)<sub>3</sub>);  $^{13}\text{C}$  NMR (DMSO- $d_6$ , 100 MHz)  $\delta$  163.2, 151.2, 145.2, 140.0, 132.0, 130.2, 127.7, 109.6, 79.9, 79.3, 74.0, 71.7, 69.4, 25.7, 21.1, 17.7, -4.75; ESIMS-LR  $m/z$  649.24 [(M+Na)<sup>+</sup>]; ESIMS-HR  $m/z$  calcd for C<sub>28</sub>H<sub>46</sub>O<sub>8</sub>N<sub>2</sub>NaSSi<sub>2</sub> [(M+Na)<sup>+</sup>] 649.2406, found 649.2390;  $[\alpha]^{20}_{\text{D}}$  16.31 (*c* 1.0, MeOH).

### 5'-Azido-2',3'-di-*O*-*tert*-butyldimethylsilyl-5'-deoxypseudouridine (7)

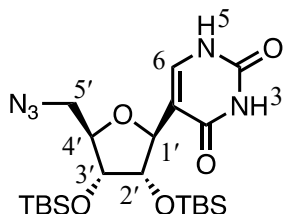

$^1\text{H}$  NMR (DMSO- $d_6$ , 400 MHz)  $\delta$  10.99 (s, 1H, H5), 7.45 (s, 1H, H6), 4.50 (d, 1H, H1',  $J_{1',2'}$  = 4.0 Hz), 4.29 (dd, 1H, H2',  $J_{2',1'}$  = 4.0,  $J_{2',3'}$  = 4.8 Hz), 4.01 (dd, 1H, H3',  $J_{3',2'}$  = 4.8,  $J_{3',4'}$  = 4.8 Hz), 3.87 (dd, 1H, H4',  $J_{4',3'}$  = 4.8,  $J_{4',5'}$  = 5.2 Hz), 3.54 (d, 2H, H5',  $J_{5',4'}$  = 5.2 Hz), 0.86 (s, 18H, Si(CH<sub>3</sub>)<sub>2</sub>C(CH<sub>3</sub>)<sub>3</sub>), 0.05 (s, 12H, Si(CH<sub>3</sub>)<sub>2</sub>C(CH<sub>3</sub>)<sub>3</sub>);  $^{13}\text{C}$  NMR (DMSO- $d_6$ , 100 MHz)  $\delta$  163.3, 151.2, 140.4, 109.9, 80.7, 80.2, 74.4, 72.6, 51.4, 25.8, 17.8, -4.62; ESIMS-LR  $m/z$  520.24 [(M+Na)<sup>+</sup>]; ESIMS-HR  $m/z$  calcd for C<sub>21</sub>H<sub>39</sub>O<sub>5</sub>N<sub>5</sub>NaSi<sub>2</sub> [(M+Na)<sup>+</sup>] 520.2382, found 520.2376;  $[\alpha]^{20}_{\text{D}}$  63.20 (*c* 0.69, MeOH).

### 5'-*O*-Amino-2',3'-di-*O*-*tert*-butyldimethylsilyl-5'-deoxypseudouridine (8)

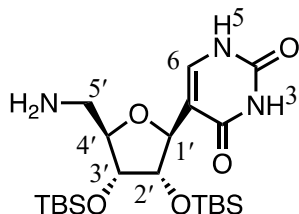

$^1\text{H}$  NMR (DMSO- $d_6$ , 400 MHz)  $\delta$  7.55 (s, 1H, H6), 4.45 (d, 1H, H1',  $J_{1',2'}$  = 5.8 Hz), 4.34 (dd, 1H, H2',  $J_{2',1'}$  = 5.8,  $J_{2',3'}$  = 4.4 Hz), 4.07 (dd, 1H, H3',  $J_{3',2'}$  = 4.4,  $J_{3',4'}$  = 4.0 Hz), 3.89 (dd, 1H, H4',  $J_{4',3'}$  = 4.0,  $J_{4',5'}$  = 6.4 Hz), 2.89 (d, 2H, H5',  $J_{5',4'}$  = 6.4 Hz), 0.86 (s, 18H, Si(CH<sub>3</sub>)<sub>2</sub>C(CH<sub>3</sub>)<sub>3</sub>), 0.04 (s, 12H, Si(CH<sub>3</sub>)<sub>2</sub>C(CH<sub>3</sub>)<sub>3</sub>);  $^{13}\text{C}$  NMR (DMSO- $d_6$ , 100 MHz)  $\delta$  163.7, 151.1, 141.7, 109.0, 81.5, 79.9, 73.7, 73.6, 41.8, 25.8, 17.8, -4.64; ESIMS-LR  $m/z$  472.27 [(M+H)<sup>+</sup>]; ESIMS-HR  $m/z$  calcd for C<sub>21</sub>H<sub>42</sub>O<sub>5</sub>N<sub>3</sub>Si<sub>2</sub> [(M+H)<sup>+</sup>] 472.2658, found 472.2651;  $[\alpha]^{20}_{\text{D}}$  -29.66 (*c* 1.00, MeOH).

### 2',3'-Di-*O*-*tert*-butyldimethylsilyl-5'-deoxy-5'-isocyanopseudouridine (10)

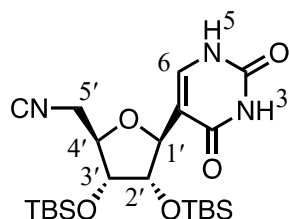

A mixture of **9** (0.50 g, 1.00 mmol) and Et<sub>3</sub>N (1.40 mL, 10.0 mmol) in CH<sub>2</sub>Cl<sub>2</sub> was treated with triphosgene (0.37 g, 1.25 mmol) at -78 °C for 2 h. After MeOH was added, the resulting mixture was stirred for additional 45 min and partitioned between AcOEt (50 mL) and H<sub>2</sub>O (15 mL). The organic phase was washed with brine (15 mL), dried (Na<sub>2</sub>SO<sub>4</sub>), filtered, and concentrated *in vacuo*. The residue was purified by silica gel column chromatography ( $\phi$  2 × 12 cm, CHCl<sub>3</sub>/MeOH: 100/0 → 99/1 → 98/2 → 97/3) to afford **10** (0.216 g, 0.449 mmol, 45%) as a white amorphous.  $^1\text{H}$  NMR

(DMSO-*d*<sub>6</sub>, 400 MHz)  $\delta$  11.15 (s, 1H, H3), 10.97 (d, 1H, H5,  $J_{5,6} = 5.4$  Hz), 7.46 (d, 1H, H6,  $J_{6,5} = 5.4$  Hz), 4.52 (d, 1H, H1',  $J_{1',2'} = 4.4$  Hz), 4.33 (dd, 1H, H2',  $J_{2',1'} = J_{2',3'} = 4.4$  Hz), 4.02 (dd, 1H, H3',  $J_{3',2'} = 4.4$ ,  $J_{3',4'} = 4.8$  Hz), 3.90-3.86 (m, 2H, H4', H5'), 3.68 (dd, 1H, H5',  $J_{5',4'} = 6.4$ ,  $J_{H5'} = 16.8$  Hz), 0.87 (s, 18H, Si(CH<sub>3</sub>)<sub>2</sub>C(CH<sub>3</sub>)<sub>3</sub>), 0.06 (s, 12H, Si(CH<sub>3</sub>)<sub>2</sub>C(CH<sub>3</sub>)<sub>3</sub>); <sup>13</sup>C NMR (DMSO-*d*<sub>6</sub>, 100 MHz)  $\delta$  163.3, 157.5, 151.2, 140.2, 109.6, 80.1, 78.9, 74.1, 72.6, 42.9, 25.8, 17.7, -4.87; ESIMS-LR  $m/z$  504.23 [(M+Na)<sup>+</sup>]; IR (neat)  $\nu$  2146.38 cm<sup>-1</sup>; ESIMS-HR  $m/z$  calcd for C<sub>22</sub>H<sub>39</sub>O<sub>5</sub>N<sub>3</sub>NaSi<sub>2</sub> [(M+Na)<sup>+</sup>] 504.2321, found 504.2310;  $[\alpha]_D^{20} -6.73$  (c 1.00, MeOH).

#### 4-*N*-Benzyloxyiminobutanenitrile (**11**)

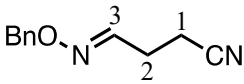 A solution of *O*-benzylhydroxylamine hydrochloride (1.50 g, 9.40 mmol) and 3-cyanopropionaldehyde dimethyl acetal (0.607 g, 4.70 mmol) in MeCN (7.5 mL) and H<sub>2</sub>O (7.5 mL) was stirred at 80 °C for 5 h. The reaction mixture was cooled to room temperature, and diluted with Et<sub>2</sub>O (45 mL). The organic phase was washed with brine (10 mL), dried (Na<sub>2</sub>SO<sub>4</sub>), filtered, and concentrated *in vacuo*. The residue was purified by silica gel column chromatography ( $\phi$  3 × 10 cm, hexane/AcOEt: 3/1) to afford **11** (0.829 g, 4.40 mmol, 94%) as a colorless oil. <sup>1</sup>H NMR (DMSO-*d*<sub>6</sub>, 400 MHz, 5:3 geometric mixture)  $\delta$  7.49 (t, 1H, H3,  $J_{3,2} = 4.6$  Hz), 7.39-7.30 (m, 5H, Ph), 5.08 (s, 2H, PhCH<sub>2</sub>), 2.61-2.51 (m, 4H, H1, H2); <sup>13</sup>C NMR (DMSO-*d*<sub>6</sub>, 100 MHz)  $\delta$  146.4, 137.4, 128.6, 128.2, 118.9, 76.5, 26.0, 22.1, 14.3; ESIMS-LR  $m/z$  211.08 [(M+Na)<sup>+</sup>]; ESIMS-HR  $m/z$  calcd for C<sub>11</sub>H<sub>12</sub>ON<sub>2</sub>Na [(M+Na)<sup>+</sup>] 211.0842, found 211.0839.

#### 5'-[2-(*S*)-*N*-Benzyloxy-*N*-(fluorenylmethyloxycarbonylaminoacetyl)amino-4-cyanobutanoylamino]-5'-deoxypseudouridine (**13**) and 5'-[2-(*R*)-*N*-benzyloxy-*N*-(fluorenylmethyloxycarbonylaminoacetyl)amino-4-cyanobutanoylamino]-5'-deoxypseudouridine (**14**)

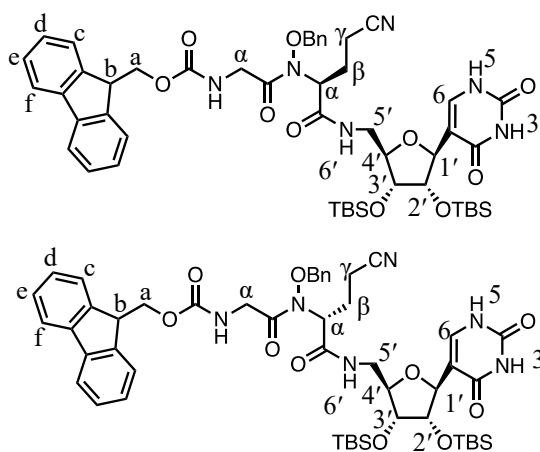

A suspension of **10** (0.40 g, 0.83 mmol), **11** (0.24 g, 1.25 mmol), Fmoc-Gly-OH (0.30 g, 1.00 mmol) and MS4A (1.60 g) in CH<sub>2</sub>Cl<sub>2</sub> (8.3 mL) was treated with ZnCl<sub>2</sub>·Et<sub>2</sub>O (1.66 mL, 1.66 mmol) at room temperature for 48 h. Molecular sieves 4A was filtered off through a Celite pad, and the filtrate was diluted with AcOEt (120 mL) and washed with saturated aqueous NaHCO<sub>3</sub> (60 mL) three times. The organic phase was washed with brine (50 mL), dried (Na<sub>2</sub>SO<sub>4</sub>), filtered, and concentrated *in vacuo*. The residue was purified by silica gel column chromatography

( $\phi$  4.5 × 15 cm, CHCl<sub>3</sub>/MeOH: 100/0→99/1→98/2→97/3) to afford **13** (0.21 g, 0.22 mmol, 27%) and **14** (0.24 g, 0.28 mmol, 30%) as a white amorphous, respectively. Data for **13**: <sup>1</sup>H NMR (DMSO-*d*<sub>6</sub>, 400 MHz)  $\delta$  11.14 (s, 1H, H3), 10.98 (s, 1H, H5), 8.34 (s, 1H, H6'), 7.89 (d, 2H, H-f,  $J_{f,e} = 8.0$  Hz), 7.73 (d, 2H, H-c,  $J_{c,d} = 7.2$  Hz), 7.60 (t, 1H, Gly-NH,  $J_{\text{Gly-NH,Gly-}\alpha\text{-CH}} = 5.6$  Hz), 7.50 (s, 1H, H6), 7.42-

7.31 (m, 9H, H-d, H-e, Ph), 5.07 (d, 1H, PhCH<sub>2</sub>,  $J_{\text{PhCH}_2, \text{PhCH}_2} = 9.8$  Hz), 4.95 (d, 1H, PhCH<sub>2</sub>,  $J_{\text{PhCH}_2, \text{PhCH}_2} = 9.8$  Hz), 4.80 (t, 1H, Gln- $\alpha$ -CH,  $J_{\text{Gln-}\alpha\text{-CH}, \text{Gln-}\beta\text{-CH}} = 7.2$  Hz), 4.42 (d, 1H, H1',  $J_{1',2'} = 5.6$  Hz), 4.31-4.22 (m, 4H, H2', H-a, H-b), 4.15 (dd, 1H, Gly- $\alpha$ -CH,  $J_{\text{Gly-}\alpha\text{-CH}, \text{Gly-NH}} = 5.6$ ,  $J_{\text{Gly-}\alpha\text{-CH}, \text{Gly-}\alpha\text{-CH}} = 17.6$  Hz), 4.03 (dd, 1H, Gly- $\alpha$ -CH,  $J_{\text{Gly-}\alpha\text{-CH}, \text{Gly-NH}} = 5.6$ ,  $J_{\text{Gly-}\alpha\text{-CH}, \text{Gly-}\alpha\text{-CH}} = 17.6$  Hz), 3.95-3.94 (m, 1H, H3'), 3.85-3.84 (m, 1H, H4'), 3.35-3.33 (m, 2H, H5'), 2.54-2.41 (m, 2H, Gln- $\gamma$ -CH), 2.21 (td, 2H, Gln- $\beta$ -CH,  $J_{\text{Gly-}\beta\text{-CH}, \text{Gln-}\alpha\text{-CH}} = 7.2$ ,  $J_{\text{Gly-}\beta\text{-CH}, \text{Gln-}\gamma\text{-CH}} = 8.6$  Hz), 0.84 (s, 18H, Si(CH<sub>3</sub>)<sub>2</sub>C(CH<sub>3</sub>)<sub>3</sub>), 0.02 (s, 12H, Si(CH<sub>3</sub>)<sub>2</sub>C(CH<sub>3</sub>)<sub>3</sub>); <sup>13</sup>C NMR (DMSO-*d*<sub>6</sub>, 100 MHz)  $\delta$  168.2, 163.5, 156.6, 151.2, 143.9, 141.2, 140.8, 134.4, 129.4, 128.9, 128.6, 127.7, 127.1, 125.3, 120.1, 119.9, 109.5, 81.5, 79.5, 79.2, 77.7, 74.0, 74.0, 65.8, 60.1, 46.6, 41.8, 41.8, 25.8, 24.4, 17.7, 13.8, -4.70; ESIMS-LR *m/z* 989.43 [(M+Na)<sup>+</sup>]; ESIMS-HR *m/z* calcd for C<sub>50</sub>H<sub>66</sub>O<sub>10</sub>N<sub>6</sub>NaSi<sub>2</sub> [(M+Na)<sup>+</sup>] 989.4271, found 989.4259; [ $\alpha$ ]<sup>20</sup><sub>D</sub> -52.0 (*c* 0.94, CHCl<sub>3</sub>). Data for **14**: <sup>1</sup>H NMR (DMSO-*d*<sub>6</sub>, 400 MHz)  $\delta$  11.13 (s, 1H, H3), 10.96 (s, 1H, H5), 8.35 (s, 1H, H6'), 7.89 (d, 2H, H-f,  $J_{f,e} = 7.6$  Hz), 7.73 (d, 2H, H-c,  $J_{c,d} = 7.2$  Hz), 7.58 (t, 1H, Gly-NH,  $J_{\text{Gly-NH}, \text{Gly-}\alpha\text{-CH}} = 6.0$  Hz), 7.49 (s, 1H, H6), 7.44-7.31 (m, 9H, H-d, H-e, Ph), 5.09 (d, 1H, PhCH<sub>2</sub>,  $J_{\text{PhCH}_2, \text{PhCH}_2} = 10.0$  Hz), 4.95 (d, 1H, PhCH<sub>2</sub>,  $J_{\text{PhCH}_2, \text{PhCH}_2} = 10.0$  Hz), 4.80 (t, 1H, Gln- $\alpha$ -CH,  $J_{\text{Gln-}\alpha\text{-CH}, \text{Gln-}\beta\text{-CH}} = 6.4$  Hz), 4.42 (d, 1H, H1',  $J_{1',2'} = 4.4$  Hz), 4.32-4.21 (m, 4H, H2', H-a, H-b), 4.14 (dd, 1H, Gly- $\alpha$ -CH,  $J_{\text{Gly-}\alpha\text{-CH}, \text{Gly-NH}} = 5.6$ ,  $J_{\text{Gly-}\alpha\text{-CH}, \text{Gly-}\alpha\text{-CH}} = 18.0$  Hz), 4.02 (dd, 1H, Gly- $\alpha$ -CH,  $J_{\text{Gly-}\alpha\text{-CH}, \text{Gly-NH}} = 5.6$ ,  $J_{\text{Gly-}\alpha\text{-CH}, \text{Gly-}\alpha\text{-CH}} = 18.0$  Hz), 3.93-3.92 (m, 1H, H3'), 3.85-3.84 (m, 1H, H4'), 3.39-3.27 (m, 2H, H5'), 2.57-2.42 (m, 2H, Gln- $\gamma$ -CH), 2.27-2.15 (m, 2H, Gln- $\beta$ -CH), 0.84 (s, 18H, Si(CH<sub>3</sub>)<sub>2</sub>C(CH<sub>3</sub>)<sub>3</sub>), 0.02 (s, 12H, Si(CH<sub>3</sub>)<sub>2</sub>C(CH<sub>3</sub>)<sub>3</sub>); <sup>13</sup>C NMR (DMSO-*d*<sub>6</sub>, 100 MHz)  $\delta$  168.2, 163.5, 156.6, 151.2, 143.9, 141.0, 140.8, 134.5, 129.3, 128.8, 128.5, 127.7, 127.1, 125.3, 120.2, 119.9, 109.7, 81.4, 79.6, 79.2, 77.7, 74.2, 74.0, 65.8, 60.2, 46.6, 42.0, 41.7, 25.8, 24.5, 17.7, 13.8, -4.70; ESIMS-LR *m/z* 989.43 [(M+Na)<sup>+</sup>]; ESIMS-HR *m/z* calcd for C<sub>50</sub>H<sub>66</sub>O<sub>10</sub>N<sub>6</sub>NaSi<sub>2</sub> [(M+Na)<sup>+</sup>] 989.4271, found 989.4254; [ $\alpha$ ]<sup>20</sup><sub>D</sub> -15.26 (*c* 1.00, CHCl<sub>3</sub>).

### General procedure of consideration of Ugi reaction in Table

A suspension of **10** (5.0 mg, 10.4  $\mu$ mol), **11** (2.93 mg, 15.6  $\mu$ mol), Fmoc-Gly-OH (3.7 mg, 12.5  $\mu$ mol) and MS4A (20 mg) in CH<sub>2</sub>Cl<sub>2</sub> (100  $\mu$ L) was treated with Lewis acid (20.8  $\mu$ mol) at room temperature for 48 h. Molecular sieves 4A was filtered off through a Celite pad, and the filtrate was purified by preparative thin-layer chromatography (CHCl<sub>3</sub>/MeOH: 96/4) to afford **13** and **14** as a white amorphous, respectively. The results are described in Table 1.

### 5'-(2-(*S*)-*N*-Benzyloxy-*N*-fluorenylmethyloxycarbonylaminoacetyl-amino-4-carbamoylbutanoyl)amino-5'-deoxypseudouridine (**15**)

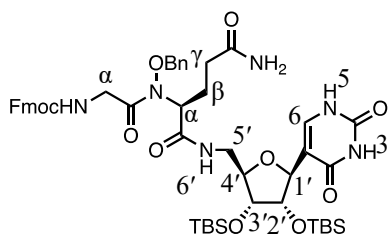

A solution of **13** (40.1 mg, 41.5  $\mu$ mol) and acetaldoxime (73.5  $\mu$ L, 1.24 mmol) in toluene (420  $\mu$ L) was treated with  $\text{InCl}_3$  (13.8 mg, 62.4 mmol) at room temperature for 12 h. The resulting mixture was concentrated *in vacuo* with silica gel. The silica gel charging the crude material was purified by silica gel column chromatography ( $\phi$  2  $\times$  7

cm,  $\text{CHCl}_3/\text{MeOH}$ : 100/0 $\rightarrow$ 99/1 $\rightarrow$ 98/2 $\rightarrow$ 97/3) to afford **15** (42.3 mg, 41.5  $\mu$ mol, quant.) as a white solid.  $^1\text{H}$  NMR ( $\text{DMSO-}d_6$ , 400 MHz)  $\delta$  11.13 (s, 1H, H3), 10.95 (s, 1H, H5), 8.25 (s, 1H, H6'), 7.90 (d, 2H, H-f,  $J_{f,e} = 7.6$  Hz), 7.73 (d, 2H, H-c,  $J_{c,d} = 7.2$  Hz), 7.56-7.22 (m, 12H, Gly-NH, H6, H-d, H-e, Ph, Gln-NH), 6.78 (s, 1H, Gln-NH), 5.11 (m, 1H,  $\text{PhCH}_2$ ), 4.95 (m, 1H,  $\text{PhCH}_2$ ), 4.76 (s, 1H, Gln- $\alpha$ -CH), 4.42 (d, 1H, H1',  $J_{1',2'} = 5.6$  Hz), 4.31-4.29 (m, 4H, H2', H-a, H-b), 4.13 (dd, 1H, Gly- $\alpha$ -CH,  $J_{\text{Gly-}\alpha\text{-CH, Gly-NH}} = 3.6$ ,  $J_{\text{Gly-}\alpha\text{-CH, Gly-}\alpha\text{-CH}} = 10.8$  Hz), 4.03 (dd, 1H, Gly- $\alpha$ -CH,  $J_{\text{Gly-}\alpha\text{-CH, Gly-NH}} = 3.6$ ,  $J_{\text{Gly-}\alpha\text{-CH, Gly-}\alpha\text{-CH}} = 10.8$  Hz), 3.93 (s, 1H, H3'), 3.84 (m, 1H, H4'), 3.36-3.34 (m, 2H, H5'), 2.09-2.07 (m, 4H, Gln- $\beta$ -CH, Gln- $\gamma$ -CH), 0.83 (s, 18H,  $\text{Si}(\text{CH}_3)_2\text{C}(\text{CH}_3)_3$ ), 0.02 (s, 12H,  $\text{Si}(\text{CH}_3)_2\text{C}(\text{CH}_3)_3$ );  $^{13}\text{C}$  NMR ( $\text{DMSO-}d_6$ , 100 MHz)  $\delta$  173.3, 172.5, 169.2, 163.5, 156.6, 151.2, 143.8, 141.1, 140.7, 134.6, 129.3, 128.7, 128.5, 127.6, 127.1, 125.3, 120.1, 109.6, 81.6, 79.5, 79.2, 77.6, 74.1, 74.0, 65.8, 61.0, 46.6, 41.7, 31.7, 26.2, 24.1, 17.7, -4.73; ESIMS-LR  $m/z$  1007.44 [(M+Na) $^+$ ]; ESIMS-HR  $m/z$  calcd for  $\text{C}_{50}\text{H}_{68}\text{O}_{11}\text{N}_6\text{NaSi}_2$  [(M+Na) $^+$ ] 1007.4377, found 1007.4370;  $[\alpha]_D^{20} -18.53$  ( $c$  1.00,  $\text{CHCl}_3$ ).

#### 5'-(2-(*R*)-*N*-Benzyloxy-*N*-fluorenylmethyloxycarbonylaminoacetyl-amino-4-carbamoylbutanoyl)amino-5'-deoxypseudouridine (**18**)

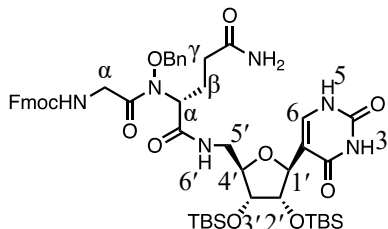

A solution of **14** (52.8 mg, 54.6  $\mu$ mol) and acetaldoxime (96.7  $\mu$ L, 1.64 mmol) in toluene (550  $\mu$ L) was treated with  $\text{InCl}_3$  (18.1 mg, 81.8 mmol) at room temperature for 9 h. The resulting mixture was concentrated *in vacuo* with silica gel. The silica gel charging the crude material was purified by silica gel column chromatography ( $\phi$  2  $\times$  7

cm,  $\text{CHCl}_3/\text{MeOH}$ : 100/0 $\rightarrow$ 99/1 $\rightarrow$ 98/2 $\rightarrow$ 97/3) to afford **18** (54.8 mg, 54.6  $\mu$ mol, quant.) as a white solid.  $^1\text{H}$  NMR ( $\text{DMSO-}d_6$ , 400 MHz)  $\delta$  11.12 (s, 1H, H3), 10.94 (s, 1H, H5), 8.22 (s, 1H, H6'), 7.89 (d, 2H, H-f,  $J_{f,e} = 7.6$  Hz), 7.73 (d, 2H, H-c,  $J_{c,d} = 7.2$  Hz), 7.59-7.23 (m, 12H, Gly-NH, H6, H-d, H-e, Ph, Gln-NH), 6.79 (s, 1H, Gln-NH), 5.11 (m, 1H,  $\text{PhCH}_2$ ), 4.93 (m, 1H,  $\text{PhCH}_2$ ), 4.75 (s, 1H, Gln- $\alpha$ -CH), 4.42 (d, 1H, H1',  $J_{1',2'} = 5.2$  Hz), 4.33-4.22 (m, 4H, H2', H-a, H-b), 4.12 (dd, 1H, Gly- $\alpha$ -CH,  $J_{\text{Gly-}\alpha\text{-CH, Gly-NH}} = 6.0$ ,  $J_{\text{Gly-}\alpha\text{-CH, Gly-}\alpha\text{-CH}} = 17.6$  Hz), 4.03 (dd, 1H, Gly- $\alpha$ -CH,  $J_{\text{Gly-}\alpha\text{-CH, Gly-NH}} = 6.0$ ,  $J_{\text{Gly-}\alpha\text{-CH, Gly-}\alpha\text{-CH}} = 17.6$  Hz), 3.93-3.92 (m, 1H, H3'), 3.84-3.82 (m, 1H, H4'), 3.35-3.27 (m, 2H, H5'), 2.08-2.06 (m, 4H, Gln- $\beta$ -CH, Gln- $\gamma$ -CH), 0.83 (s, 18H,  $\text{Si}(\text{CH}_3)_2\text{C}(\text{CH}_3)_3$ ), 0.00 (s, 12H,  $\text{Si}(\text{CH}_3)_2\text{C}(\text{CH}_3)_3$ );  $^{13}\text{C}$  NMR ( $\text{DMSO-}d_6$ , 100 MHz)  $\delta$  173.4, 172.4, 169.2, 163.5, 156.6, 151.2, 143.9, 141.0, 140.8, 134.7, 129.3, 128.7, 128.5, 127.7, 127.1, 125.3, 120.1, 109.8, 81.6, 79.7, 79.2, 77.7, 74.2, 74.1, 65.9, 61.1, 46.7, 41.8, 31.7, 25.8, 24.2, 17.8, -4.69; ESIMS-LR  $m/z$  1007.44 [(M+Na) $^+$ ]; ESIMS-HR  $m/z$  calcd for  $\text{C}_{50}\text{H}_{68}\text{O}_{11}\text{N}_6\text{NaSi}_2$  [(M+Na) $^+$ ] 1007.4377, found 1007.4367;  $[\alpha]_D^{20} -20.52$  ( $c$  0.50,  $\text{CHCl}_3$ ).



**5'-[2-(S)-N-Benzoyloxy-(N,N'-di-tert-butoxycarbonyl-1-carboxamidylaminoacetyl)amino-4-carbamoyl-butanoyl]amino-5'-deoxypseudouridine (17)**

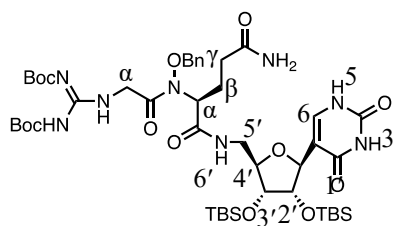

A solution of **15** (23.7 mg, 24.1  $\mu\text{mol}$ ) and *N,N'*-di-Boc-1*H*-pyrazole-1-carboxamide (11.2 mg, 36.1  $\mu\text{mol}$ ) in DMF (220  $\mu\text{L}$ ) was treated with DBU (4.39  $\mu\text{L}$ , 28.9  $\mu\text{mol}$ ) at room temperature for 4 h. The resulting mixture was concentrated *in vacuo* with silica gel. The silica gel charging the crude material was purified by silica gel column

chromatography ( $\phi$  1.5  $\times$  9 cm,  $\text{CHCl}_3/\text{MeOH}$ : 100/0 $\rightarrow$ 99/1 $\rightarrow$ 98/2 $\rightarrow$ 97/3 $\rightarrow$ 96/4) to afford **17** (19.6 mg, 19.5  $\mu\text{mol}$ , 81%) as a white solid.  $^1\text{H}$  NMR (DMSO-*d*<sub>6</sub>, 400 MHz)  $\delta$  11.45 (s, 1H, Gua-NH), 11.13 (s, 1H, H3), 10.93 (d, 1H, H5,  $J_{\text{H}6} = 5.6$  Hz), 8.76 (s, 1H, Gly-NH), 8.21 (s, 1H, H6'), 7.49 (d, 1H, H6,  $J_5 = 5.6$  Hz), 7.44-7.39 (m, 5H, Ph), 7.19 (s, 1H, Gln-NH), 6.76 (s, 1H, Gln-NH), 5.13 (d, 1H,  $\text{PhCH}_2$ ,  $J_{\text{PhCH}_2, \text{PhCH}_2} = 10.4$  Hz), 5.00 (d, 1H,  $\text{PhCH}_2$ ,  $J_{\text{PhCH}_2, \text{PhCH}_2} = 10.4$  Hz), 4.76-4.72 (m, 1H, Gln- $\alpha$ -CH), 4.41-4.40 (m, 3H, H1', Gly- $\alpha$ -CH), 4.34 (dd, 1H, H2',  $J_{2',1'} = 5.2$ ,  $J_{2',3'} = 4.4$  Hz), 3.92 (dd, 1H, H3',  $J_{3',2'} = 4.4$ ,  $J_{3',4'} = 4.0$  Hz), 3.84 (dd, 1H, H4',  $J_{4',3'} = 4.0$ ,  $J_{4',5'} = 5.6$  Hz), 3.31 (m, 2H, H5'), 2.18-2.07 (m, 4H, Gln- $\beta$ -CH Gln- $\gamma$ -CH), 1.49 (s, 9H, H<sup>t</sup>-Bu), 1.38 (s, 9H, H<sup>t</sup>-Bu), 0.84 (s, 18H,  $\text{Si}(\text{CH}_3)_2\text{C}(\text{CH}_3)_3$ ), 0.02 (s, 12H,  $\text{Si}(\text{CH}_3)_2\text{C}(\text{CH}_3)_3$ );  $^{13}\text{C}$  NMR (DMSO-*d*<sub>6</sub>, 100 MHz)  $\delta$  173.3, 171.1, 169.0, 163.5, 162.8, 155.0, 151.9, 151.1, 141.2, 134.5, 129.2, 128.7, 128.5, 109.5, 83.1, 81.9, 79.5, 79.2, 78.3, 77.6, 73.9, 61.1, 42.5, 41.6, 31.6, 27.6, 25.7, 24.0, 17.7, -4.77; ESIMS-LR  $m/z$  1027.49 [(M+Na)<sup>+</sup>]; ESIMS-HR  $m/z$  calcd for  $\text{C}_{46}\text{H}_{76}\text{O}_{13}\text{N}_8\text{NaSi}_2$  [(M+Na)<sup>+</sup>] 1027.4963, found 1027.4934;  $[\alpha]_D^{20} -40.16$  (*c* 0.45,  $\text{CHCl}_3$ ).

**5'-[2-(R)-N-Benzoyloxy-(N,N'-di-tert-butoxycarbonyl-1-carboxamidylaminoacetyl)amino-4-carbamoyl-butanoyl]amino-5'-deoxypseudouridine (21)**

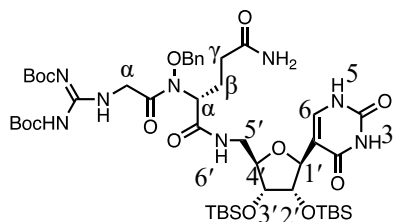

A solution of **18** (20.9 mg, 21.2  $\mu\text{mol}$ ) and *N,N'*-di-Boc-1*H*-pyrazole-1-carboxamide (9.87 mg, 31.8  $\mu\text{mol}$ ) in DMF (194  $\mu\text{L}$ ) was treated with DBU (3.84  $\mu\text{L}$ , 25.5  $\mu\text{mol}$ ) at room temperature for 4 h. The resulting mixture was concentrated *in vacuo* with silica gel. The silica gel charging the crude material was purified by silica gel column

chromatography ( $\phi$  1.5  $\times$  7 cm,  $\text{CHCl}_3/\text{MeOH}$ : 100/0 $\rightarrow$ 99/1 $\rightarrow$ 98/2 $\rightarrow$ 97/3) to afford **21** (18.3 mg, 18.2  $\mu\text{mol}$ , 86%) as a white solid.  $^1\text{H}$  NMR (DMSO-*d*<sub>6</sub>, 400 MHz)  $\delta$  11.46 (s, 1H, Gua-NH), 11.11 (s, 1H, H3), 10.94 (s, 1H, H5), 8.75 (s, 1H, Gly-NH), 8.22 (s, 1H, H6'), 7.50 (s, 1H, H6), 7.44-7.38 (m, 5H, Ph), 7.21 (s, 1H, Gln-NH), 6.77 (s, 1H, Gln-NH), 5.16 (d, 1H,  $\text{PhCH}_2$ ,  $J_{\text{PhCH}_2, \text{PhCH}_2} = 9.6$  Hz), 4.99 (d, 1H,  $\text{PhCH}_2$ ,  $J_{\text{PhCH}_2, \text{PhCH}_2} = 9.6$  Hz), 4.77-4.71 (m, 1H, Gln- $\alpha$ -CH), 4.41-4.40 (m, 3H, H1', Gly- $\alpha$ -CH), 4.34 (dd, 1H, H2',  $J_{2',1'} = 5.6$ ,  $J_{2',3'} = 4.2$  Hz), 3.93 (dd, 1H, H3',  $J_{3',2'} = 4.2$ ,  $J_{3',4'} = 4.0$  Hz), 3.84 (dd, 1H, H4',  $J_{4',3'} = 4.0$ ,  $J_{4',5'} = 6.0$  Hz), 3.32 (m, 2H, H5'), 2.17-2.08 (m, 4H, Gln- $\beta$ -CH Gln- $\gamma$ -CH), 1.49 (s, 9H, H<sup>t</sup>-Bu), 1.39 (s, 9H, H<sup>t</sup>-Bu), 0.84 (s, 18H,  $\text{Si}(\text{CH}_3)_2\text{C}(\text{CH}_3)_3$ ), 0.02 (s, 12H,  $\text{Si}(\text{CH}_3)_2\text{C}(\text{CH}_3)_3$ );  $^{13}\text{C}$  NMR (DMSO-*d*<sub>6</sub>, 100 MHz)  $\delta$  173.3, 170.9, 169.1, 163.5, 162.8, 155.1, 152.0, 151.2, 141.2, 134.6, 129.2, 128.8, 128.5, 109.5, 83.1, 81.9, 79.6, 79.2, 78.3, 77.7, 74.0, 61.3, 42.5, 41.7, 31.6, 27.8, 25.8,

24.1, 17.7, -4.81; ESIMS-LR  $m/z$  1027.49 [(M+Na)<sup>+</sup>]; ESIMS-HR  $m/z$  calcd for C<sub>46</sub>H<sub>76</sub>O<sub>13</sub>N<sub>8</sub>NaSi<sub>2</sub> [(M+Na)<sup>+</sup>] 1027.4963, found 1027.4928; [ $\alpha$ ]<sup>20</sup><sub>D</sub> -35.47 (*c* 1.00, CHCl<sub>3</sub>).

### Preparation of L-FDAA derivatives (19) and (20)

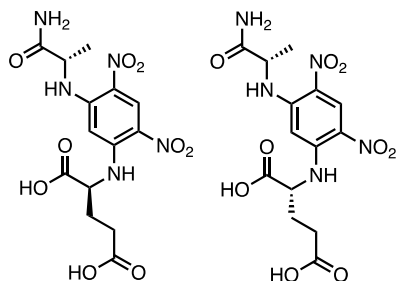

A solution of **15** or **16** (1.00 mg, 0.99  $\mu$ mol) and 5% Pd/C (10.0 mg) in MeOH (1 mL) was vigorously stirred under H<sub>2</sub> atmosphere at room temperature for 14 h. The catalyst was filtered off through a Celite pad, and the filtrate was concentrated *in vacuo*. The residue or amino acid standard (Boc-Gln-OH or Boc-D-Gln-OH) (1 mg, 4.06  $\mu$ mol) was dissolved in 6 N aqueous HCl at 95 °C for 24 h. The resulting mixture was cooled to room temperature and *in vacuo*. The residue in saturated aqueous NaHCO<sub>3</sub> (50  $\mu$ L) and acetone (200  $\mu$ L) was treated with Marfey's reagent (*N*- $\alpha$ -(2,4-dinitro-5-fluorophenyl)-L-alaninamide, L-FDAA) (1.6 mg, 5.97  $\mu$ L) at 40 °C for 16 h. The resulting mixture was diluted with MeOH and filtered (0.45  $\mu$ m PTFE) prior to LC-MS analysis.

**Conditions of LC-MS analysis:** LC-MS equipment: Shimadzu, Prominence-I LC-2030CPlus, LCMS-8040; column: COSMOSIL Packed Column 5C18-PAQ, 4.6ID  $\times$  250mm, column oven: 30 °C; eluent: isocratic elution of 15% B over 1 min; linear gradient elution of 15% B-50% B over 40 min; linear gradient elution of 50% B-90% B over 1 min; isocratic elution of 90% B over 5 min; linear gradient elution of 90% B-15% B over 1 min; isocratic elution of 15% B over 3 min (where solvent A was 0.1% TFA in H<sub>2</sub>O and solvent B was MeCN), flow rate: 0.40 mL/min, detection: UV (340 nm), method file: 15-50% MeCN over 45 min SIM 1 cm.

### Pseudouridimycin trifluoroacetate (1)

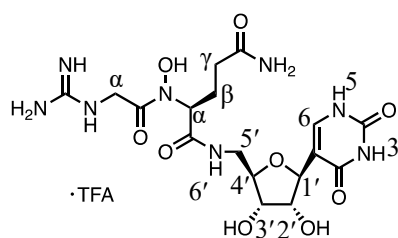

A solution of **17** (19.0 mg, 18.9  $\mu$ mol) in CH<sub>2</sub>Cl<sub>2</sub> (1.6 mL) was treated with 1 M BCl<sub>3</sub> in CH<sub>2</sub>Cl<sub>2</sub> (1.6 mL, 1.6 mmol) at -78 °C for 5 min. The mixture was warmed to 0 °C and stirred for additional 2 h. The reaction mixture was added by cooled MeOH, then warmed to room temperature and stirred for 1.5 h. The mixture was concentrated *in vacuo*, and the resulting residue was purified by ODS silica gel column chromatography ( $\phi$  2.3  $\times$  8 cm, 2 mM heptafluorobutyric acid (HFBA) in MeCN/2 mM HFBA in H<sub>2</sub>O: 0-10%) to afford **1** as a HFBA salt (9.20 mg, 13.1  $\mu$ mol, 69%) as a white form. To exchange the counter anion, the HFBA salt was treated with 0.1% TFA/MeCN and azeotroped several times to give **1** as a white solid. **1**: <sup>1</sup>H NMR (DMSO-*d*<sub>6</sub>, 400 MHz)  $\delta$  11.13 (s, 1H, H3), 10.89 (d, 1H, H5,  $J_{5,6}$  = 5.6 Hz), 9.84 (s, 1H, Gua-NH), 7.91 (t, 1H, H6',  $J_{6',5'}$  = 4.8 Hz), 7.40 (s, 1H, Gly-NH), 7.33 (d, 1H, H6,  $J_{6,5}$  = 5.6 Hz), 7.11 (s, 1H, Gln-NH), 6.90 (s, 1H, Gln-NH), 4.79-4.77 (m, 1H, Gln- $\alpha$ -CH), 4.41 (d, 1H, H1',  $J_{1',2'}$  = 4.4 Hz), 4.21 (dd, 1H, Gly- $\alpha$ -CH,  $J_{\text{Gly-}\alpha\text{-CH, Gly-NH}}$  = 4.8,  $J_{\text{Gly-}\alpha\text{-CH, Gly-}\alpha\text{-CH}}$  = 18.4 Hz), 4.11 (dd, 1H, Gly- $\alpha$ -CH,  $J_{\text{Gly-}\alpha\text{-CH, Gly-}$

$J_{\text{Gly-}\alpha\text{-CH,Gly-}\alpha\text{-CH}} = 18.4$  Hz), 3.99-3.98 (m, 3H, H2'), 3.73-3.71 (m, 2H, H3', H4'), 3.34-3.28 (m, 2H, H5'), 2.11-2.09 (m, 3H, Gln- $\beta$ -CH, Gln- $\gamma$ -CH), 2.00-1.95 (m, 1H, Gln- $\beta$ -CH);  $^{13}\text{C}$  NMR (DMSO- $d_6$ , 100 MHz)  $\delta$  174.1, 169.0, 168.7, 163.5, 157.0, 151.2, 140.1, 110.5, 81.0, 79.6, 73.3, 72.3, 59.3, 42.6, 41.6, 31.6, 23.4;  $^{19}\text{F}$  NMR (DMSO- $d_6$ , 376 MHz)  $\delta$  -74.4; ESIMS-LR  $m/z$  487.19 [(M+H) $^+$ ]; ESIMS-HR  $m/z$  calcd for  $\text{C}_{17}\text{H}_{27}\text{O}_9\text{N}_8$  [(M+H) $^+$ ] 487.1896, found 487.1888;  $[\alpha]_{\text{D}}^{20}$  -4.13 ( $c$  0.16, MeOH).

※ Optical rotation of the sample of pseudouridimycin (MCE<sup>®</sup>) (purity 89%) was -5.79 ( $c$  0.098, MeOH).

### *epi*-Pseudouridimycin trifluoroacetate (*epi*-1)

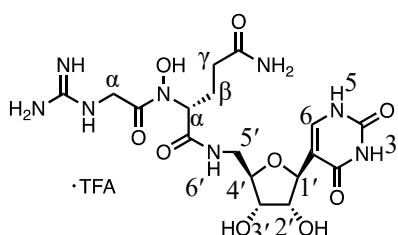

A solution of **21** (19.8 mg, 19.7  $\mu\text{mol}$ ) in  $\text{CH}_2\text{Cl}_2$  (1.6 mL) was treated with 1 M  $\text{BCl}_3$  in  $\text{CH}_2\text{Cl}_2$  (1.6 mL, 1.6 mmol) at -78  $^\circ\text{C}$  for 5 min. The mixture was warmed to 0  $^\circ\text{C}$  and stirred for additional 2 h. The reaction mixture was added by cooled MeOH, then warmed to room temperature and stirred for 1.5 h. The mixture was concentrated *in vacuo*, and the resulting residue was purified by ODS silica gel column chromatography ( $\phi$  2.3  $\times$  8 cm, 2mM heptafluorobutyric acid (HFBA) in MeCN/2 mM HFBA in  $\text{H}_2\text{O}$ : 0-10%) to afford **1** as a HFBA salt (9.80 mg, 14.0  $\mu\text{mol}$ , 71%) as a white form. To exchange the counter anion, the HFBA salt was treated with 0.1% TFA/MeCN and azeotroped several times to give **1** as a white solid. **1**:  $^1\text{H}$  NMR (DMSO- $d_6$ , 400 MHz)  $\delta$  11.13 (s, 1H, H3), 10.93 (d, 1H, H5,  $J_{\text{H}6} = 5.2$  Hz), 9.85 (s, 1H, Gua-NH), 7.91 (t, 1H, H6',  $J_{6',5'} = 5.2$  Hz), 7.41 (s, 1H, Gly-NH), 7.34 (d, 1H, H6,  $J_{6,5} = 5.2$  Hz), 7.14 (s, 1H, Gln-NH), 6.90 (s, 1H, Gln-NH), 4.79-4.77 (m, 1H, Gln- $\alpha$ -CH), 4.41 (d, 1H, H1',  $J_{1',2'} = 5.2$  Hz), 4.22-4.17 (m, 1H, Gly- $\alpha$ -CH), 4.10 (dd, 1H, Gly- $\alpha$ -CH,  $J_{\text{Gly-}\alpha\text{-CH,Gly-NH}} = 4.4$ ,  $J_{\text{Gly-}\alpha\text{-CH,Gly-}\alpha\text{-CH}} = 18.0$  Hz), 4.00-3.99 (m, 3H, H2'), 3.73-3.71 (m, 2H, H3', H4'), 3.42-3.38 (m, 1H, H5'), 3.19-3.16 (m, 1H, H5'), 2.11-2.08 (m, 3H, Gln- $\beta$ -CH, Gln- $\gamma$ -CH), 1.99-1.92 (m, 1H, Gln- $\beta$ -CH);  $^{13}\text{C}$  NMR (DMSO- $d_6$ , 100 MHz)  $\delta$  174.2, 169.0, 168.7, 163.6, 157.0, 151.2, 140.3, 110.5, 81.2, 79.6, 73.2, 72.3, 59.3, 42.6, 41.6, 31.6, 23.4;  $^{19}\text{F}$  NMR (DMSO- $d_6$ , 376 MHz)  $\delta$  -73.4; ESIMS-LR  $m/z$  487.18 [(M+H) $^+$ ]; ESIMS-HR  $m/z$  calcd for  $\text{C}_{17}\text{H}_{27}\text{O}_9\text{N}_8$  [(M+H) $^+$ ] 487.1896, found 487.1890;  $[\alpha]_{\text{D}}^{20}$  -10.55 ( $c$  0.91, MeOH).

## 2) NMR spectrum of synthesized compounds

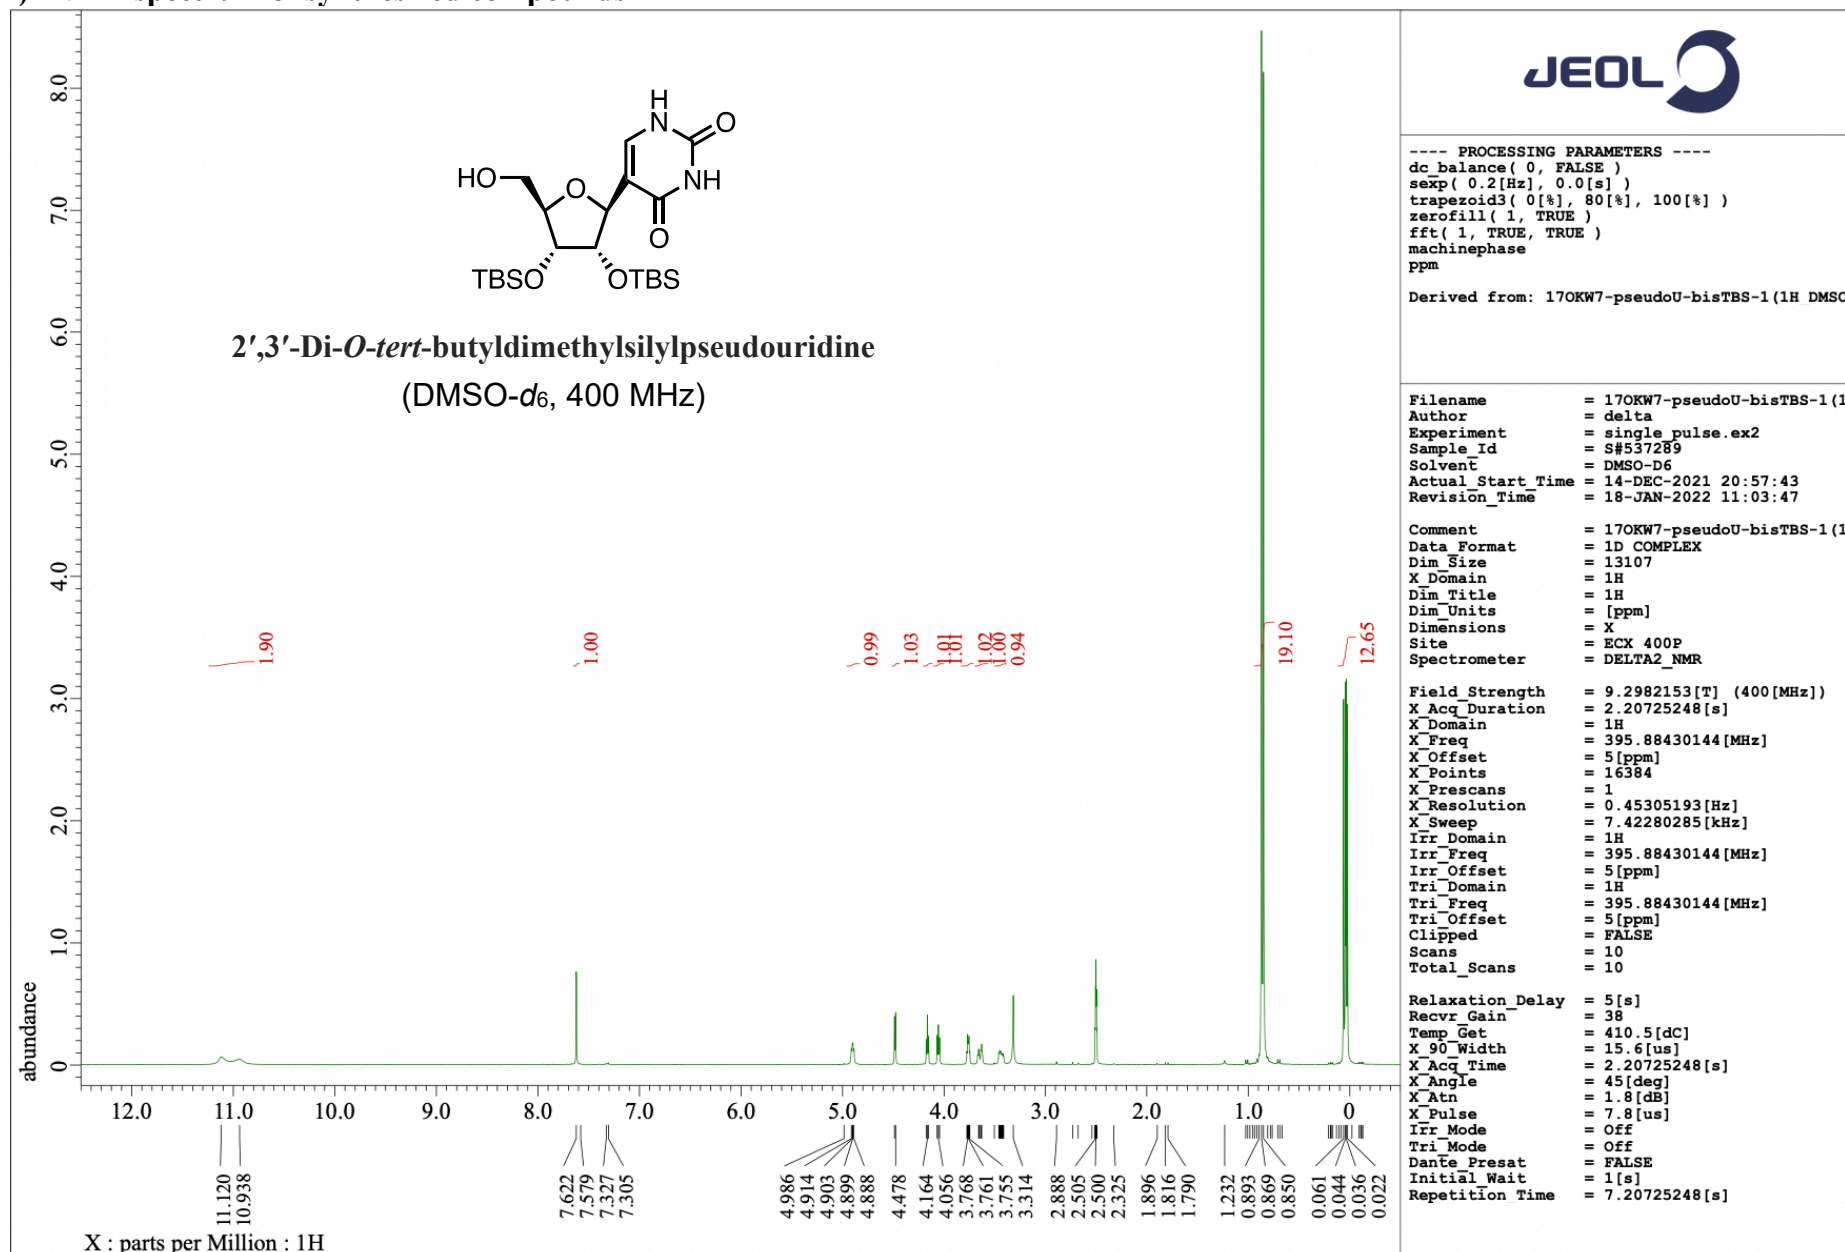

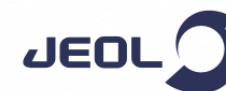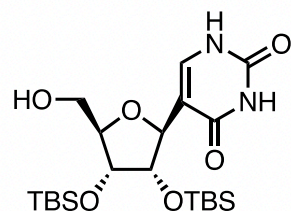

2',3'-Di-*O*-*tert*-butyldimethylsilylpseudouridine  
(DMSO-*d*<sub>6</sub>, 100 MHz)

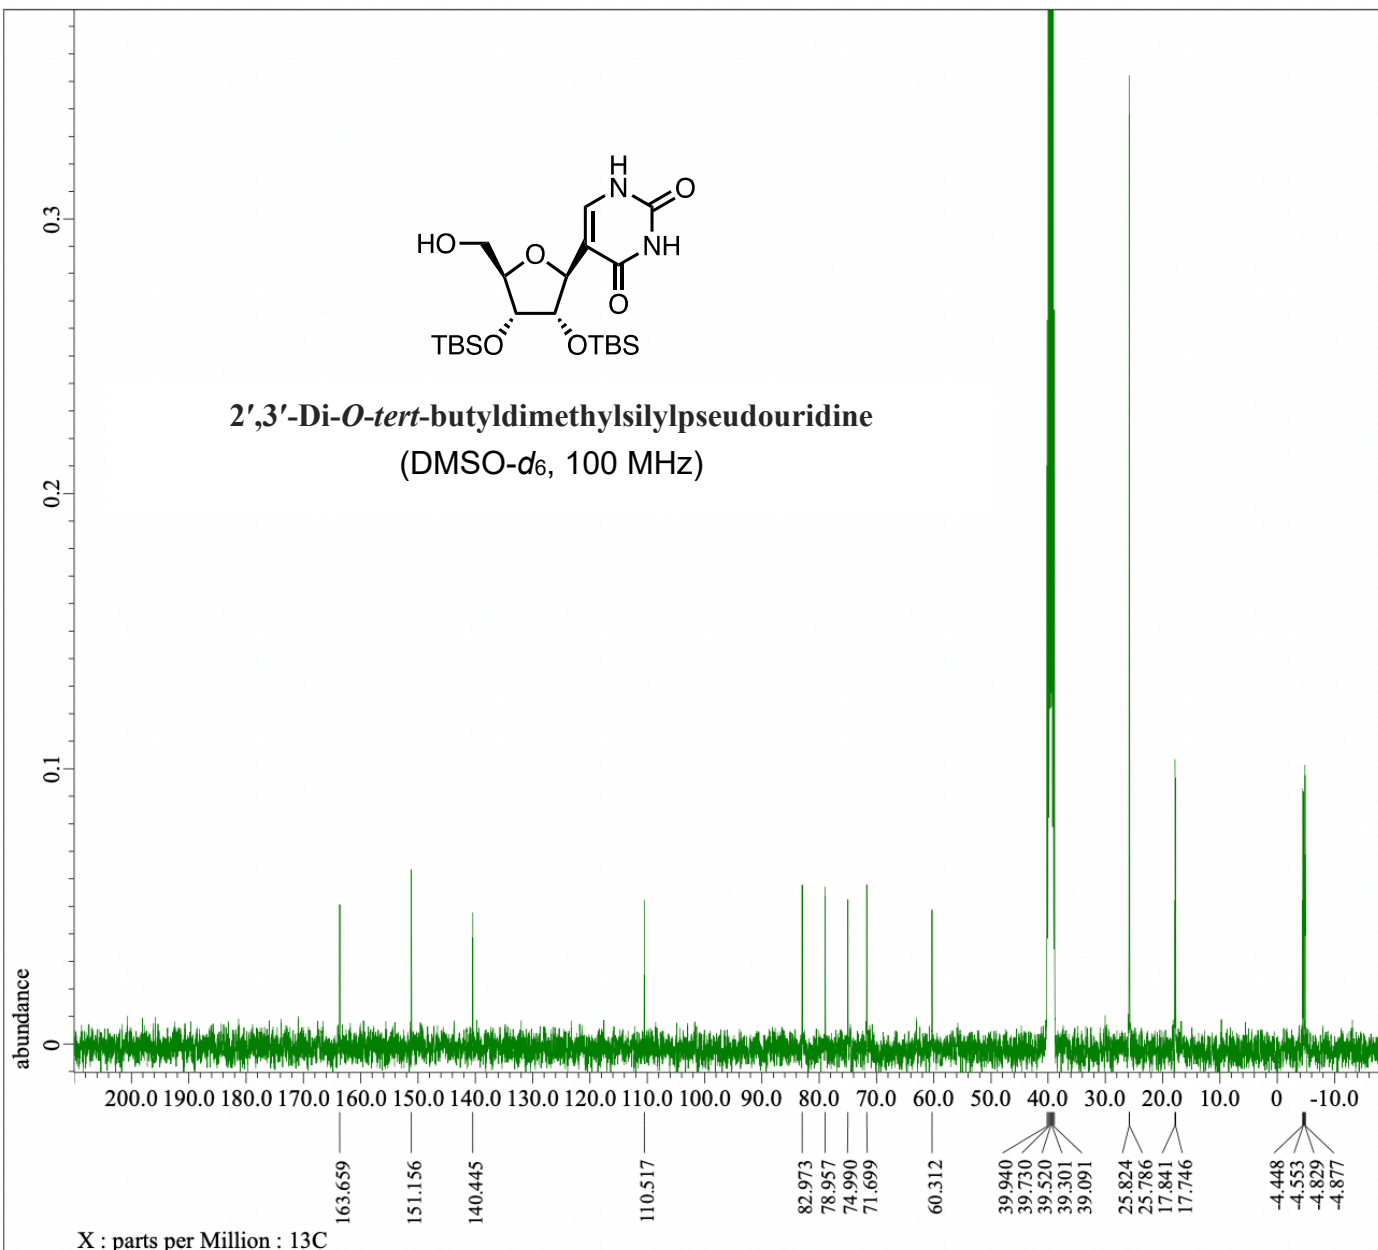

---- PROCESSING PARAMETERS ----

```
dc balance( 0, FALSE )
sexp( 2.0[Hz], 0.0[s] )
trapezoid3( 0[%], 80[%], 100[%] )
zerofill( 1, TRUE )
fft( 1, TRUE, TRUE )
machinephase
ppm
```

Derived from: 17OKW7-pseudoU-bisTBS-1(13C\_DMS

```
Filename      = 17OKW7-pseudoU-bisTBS-1(1
Author        = delta
Experiment    = single_pulse_dec
Sample_Id     = S#562023
Solvent       = DMSO-d6
Actual_Start_Time = 14-DEC-2021 22:41:18
Revision_Time  = 18-JAN-2022 11:07:42
```

```
Comment       = 17OKW7-pseudoU-bisTBS-1(1
Data_Format   = 1D COMPLEX
Dim_Size      = 26214
X_Domain      = 13C
Dim_Title     = 13C
Dim_Units     = [ppm]
Dimensions    = X
Site          = ECS 400
Spectrometer  = JNM-ECS400
```

```
Field Strength = 9.20197068[T] (390[MHz])
X_Acq_Duration = 1.06430464[s]
X_Domain       = 13C
X_Freq        = 98.51479726[MHz]
X_Offset      = 100[ppm]
X_Points      = 32768
X_Prescans    = 4
X_Resolution  = 0.93958061[Hz]
X_Sweep       = 30.78817734[kHz]
Irr_Domain    = 1H
Irr_Freq      = 391.78655441[MHz]
Irr_Offset    = 5[ppm]
Clipped       = FALSE
Scans         = 344
Total_Scans   = 344
```

```
Relaxation_Delay = 2[s]
Recvr_Gain       = 60
Temp_Get         = 21.6[dC]
X_90_Width      = 9.1[us]
X_Acq_Time      = 1.06430464[s]
X_Angle         = 30[deg]
X_Atn           = 4.6[dB]
X_Pulse         = 3.03333333[us]
Irr_Atn_Dec     = 21.36[dB]
Irr_Atn_Noise   = 21.36[dB]
Irr_Noise       = WALTZ
Decoupling      = TRUE
Initial_Wait    = 1[s]
Noe              = TRUE
Noe_Time        = 2[s]
Repetition_Time = 3.06430464[s]
```

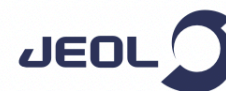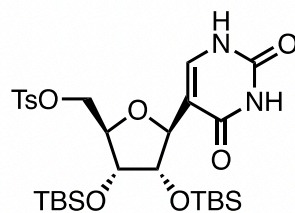

2',3'-Di-*O*-*tert*-butyldimethylsilyl-5'-*O*-*p*-toluenesulfonylpseudouridine  
(DMSO-*d*<sub>6</sub>, 400 MHz)

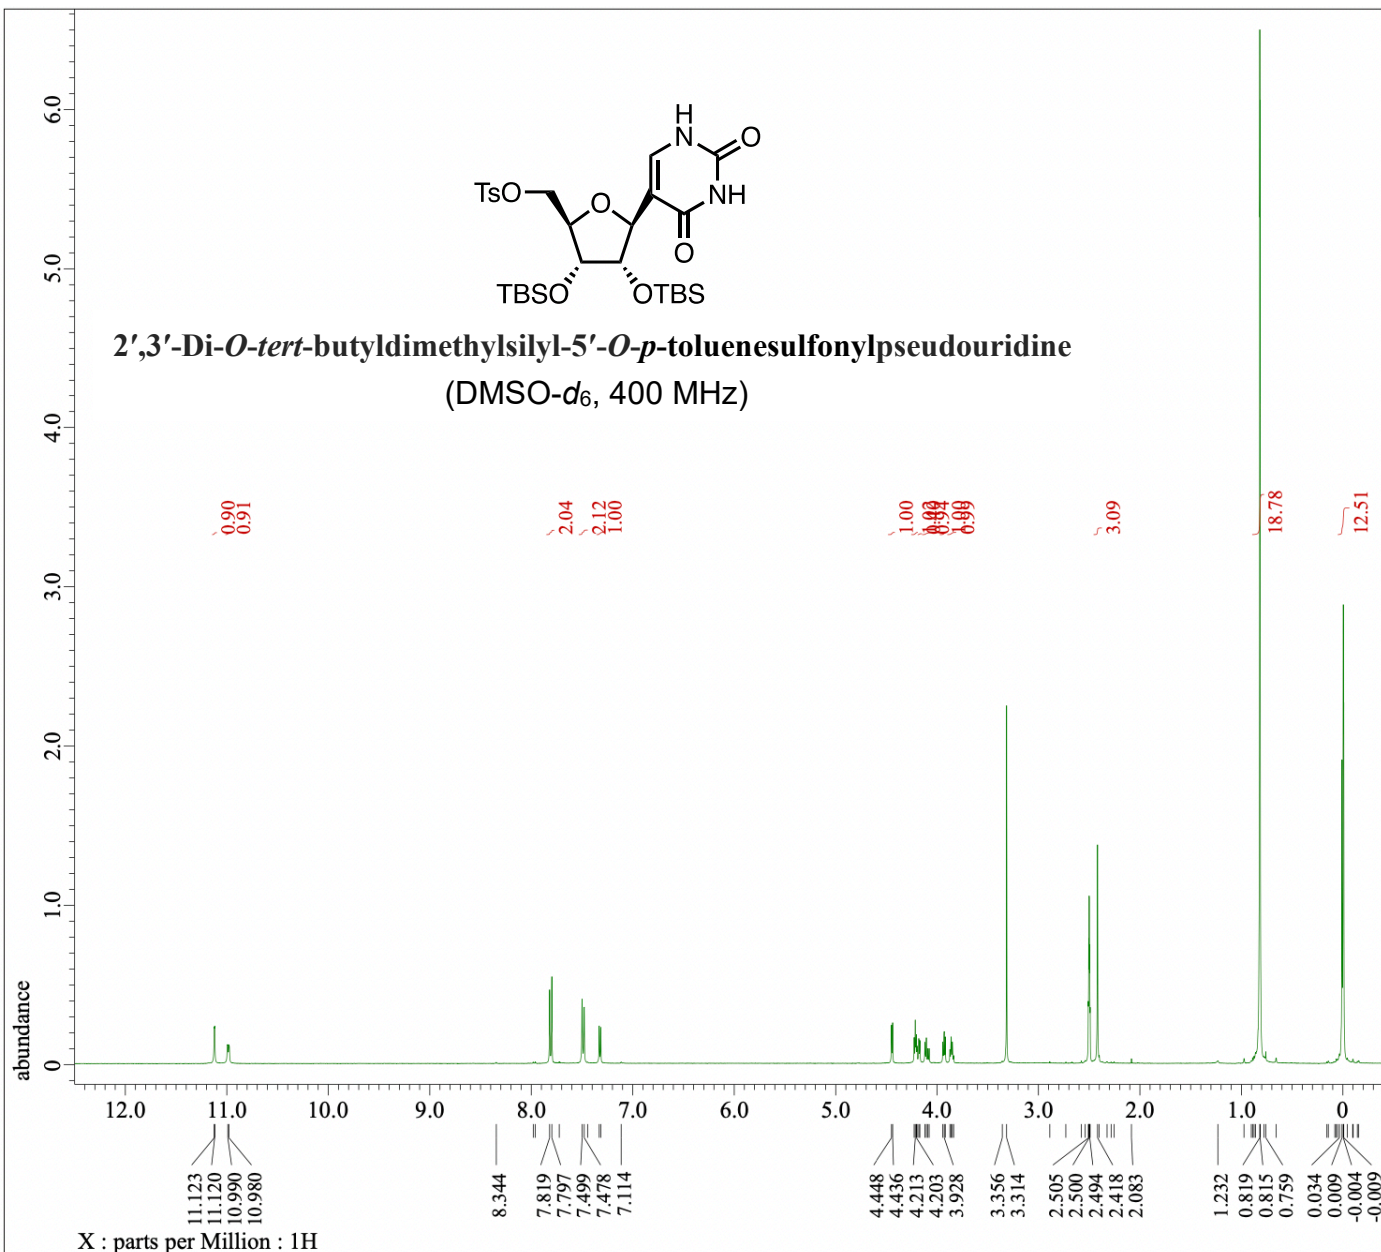

---- PROCESSING PARAMETERS ----  
dc balance( 0, FALSE )  
sexp( 0.2[Hz], 0.0[s] )  
trapezoid3( 0[%], 80[%], 100[%] )  
zerofill( 1, TRUE )  
fft( 1, TRUE, TRUE )  
machinephase  
ppm

Derived from: 170KW7-pseudoU-OTs-1(1H DMSO-d6)

Filename = 170KW7-pseudoU-OTs-1(1H\_D  
Author = delta  
Experiment = single\_pulse.ex2  
Sample\_Id = S#540619  
Solvent = DMSO-D6  
Actual\_Start\_Time = 14-DEC-2021 21:03:16  
Revision\_Time = 18-JAN-2022 11:17:52

Comment = 170KW7-pseudoU-OTs-1(1H\_D  
Data\_Format = 1D COMPLEX  
Dim\_Size = 13107  
X\_Domain = 1H  
Dim\_Title = 1H  
Dim\_Units = [ppm]  
Dimensions = X  
Site = ECX 400P  
Spectrometer = DELTA2\_NMR

Field\_Strength = 9.2982153[T] (400[MHz])  
X\_Acq\_Duration = 2.20725248[s]  
X\_Domain = 1H  
X\_Freq = 395.88430144[MHz]  
X\_Offset = 5[ppm]  
X\_Points = 16384  
X\_Prescans = 1  
X\_Resolution = 0.45305193[Hz]  
X\_Sweep = 7.42280285[kHz]  
Irr\_Domain = 1H  
Irr\_Freq = 395.88430144[MHz]  
Irr\_Offset = 5[ppm]  
Tri\_Domain = 1H  
Tri\_Freq = 395.88430144[MHz]  
Tri\_Offset = 5[ppm]  
Clipped = FALSE  
Scans = 8  
Total\_Scans = 8

Relaxation\_Delay = 5[s]  
Recvr\_Gain = 40  
Temp\_Get = 410.4[dC]  
X\_90\_Width = 15.6[us]  
X\_Acq\_Time = 2.20725248[s]  
X\_Angle = 45[deg]  
X\_Atn = 1.8[dB]  
X\_Pulse = 7.8[us]  
Irr\_Mode = Off  
Tri\_Mode = Off  
Dante\_Preset = FALSE  
Initial\_Wait = 1[s]  
Repetition\_Time = 7.20725248[s]

X : parts per Million : 1H

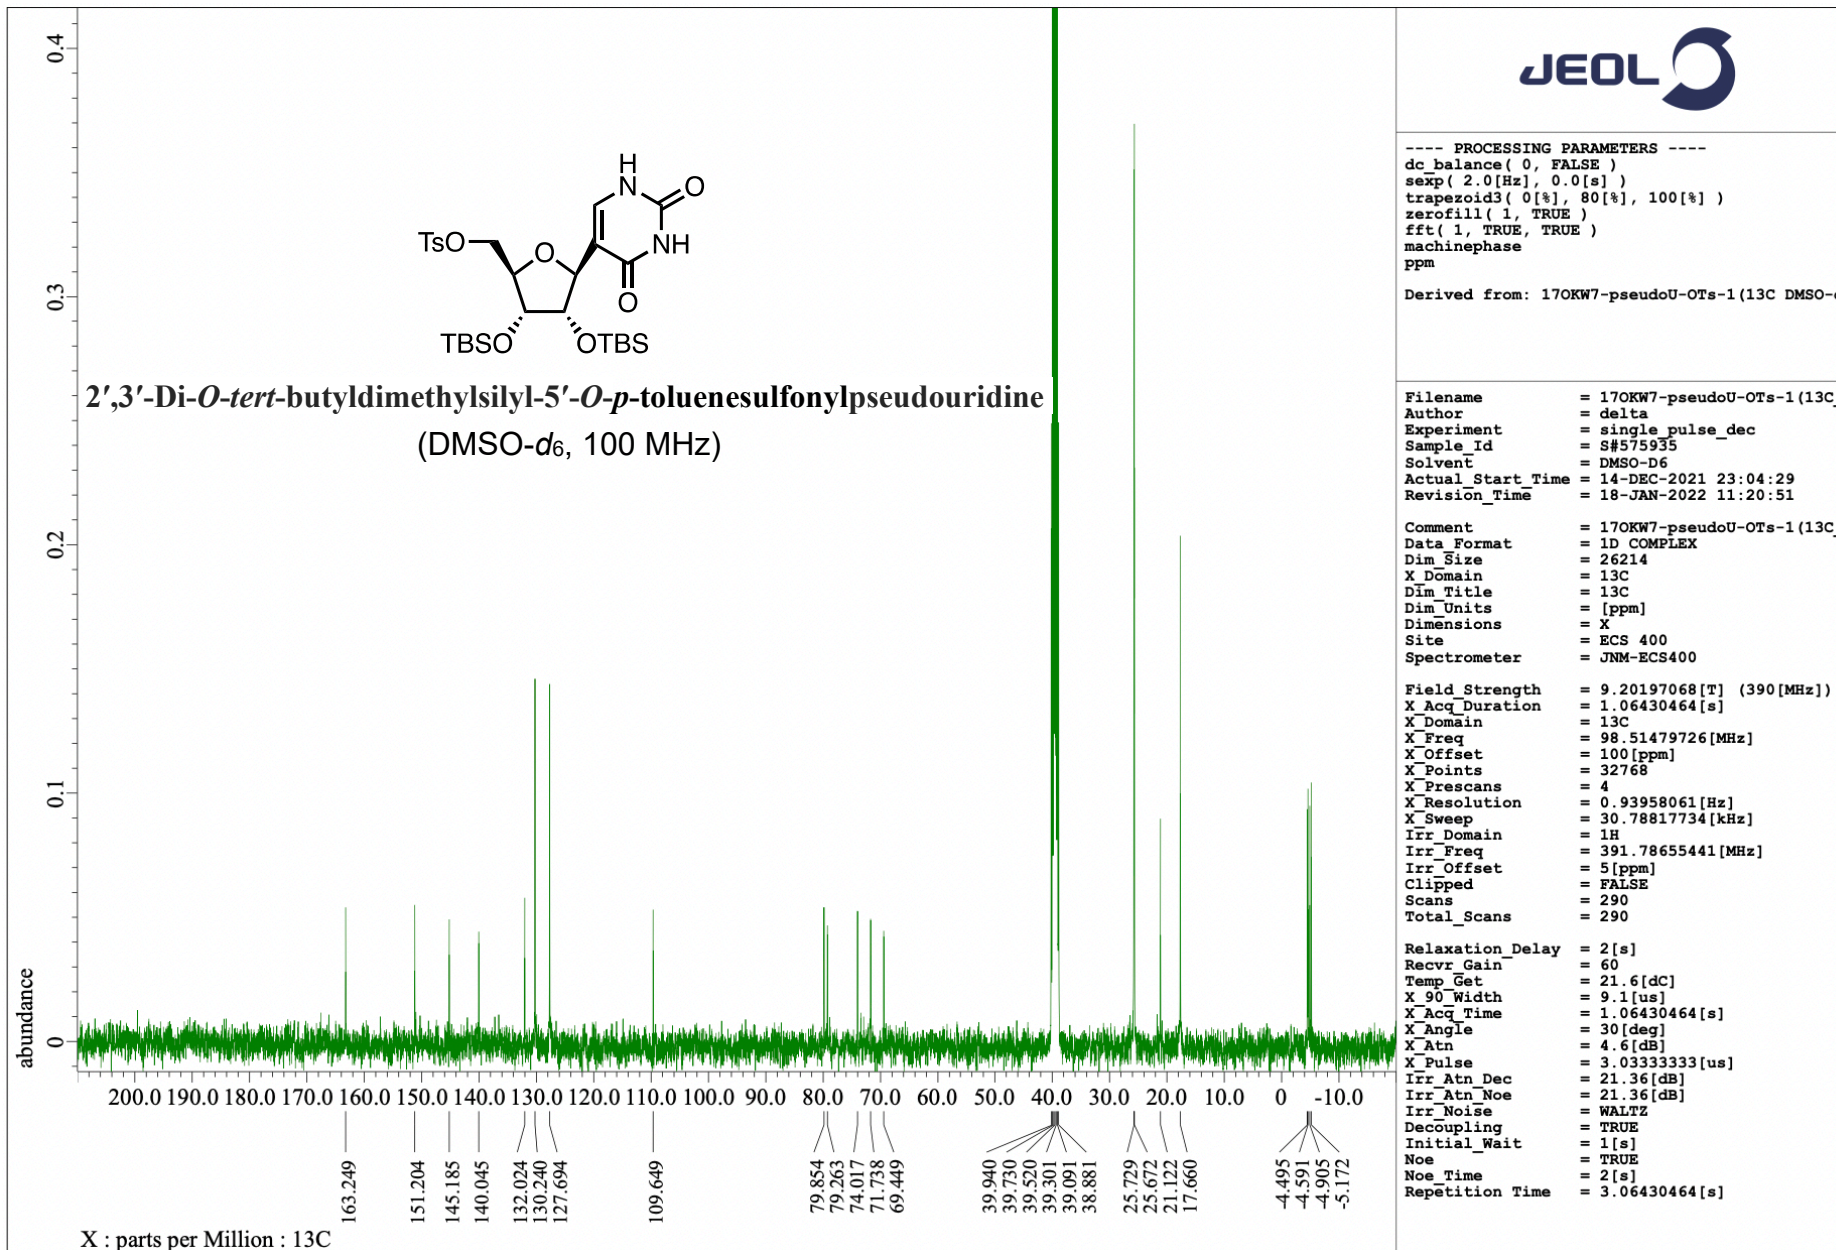

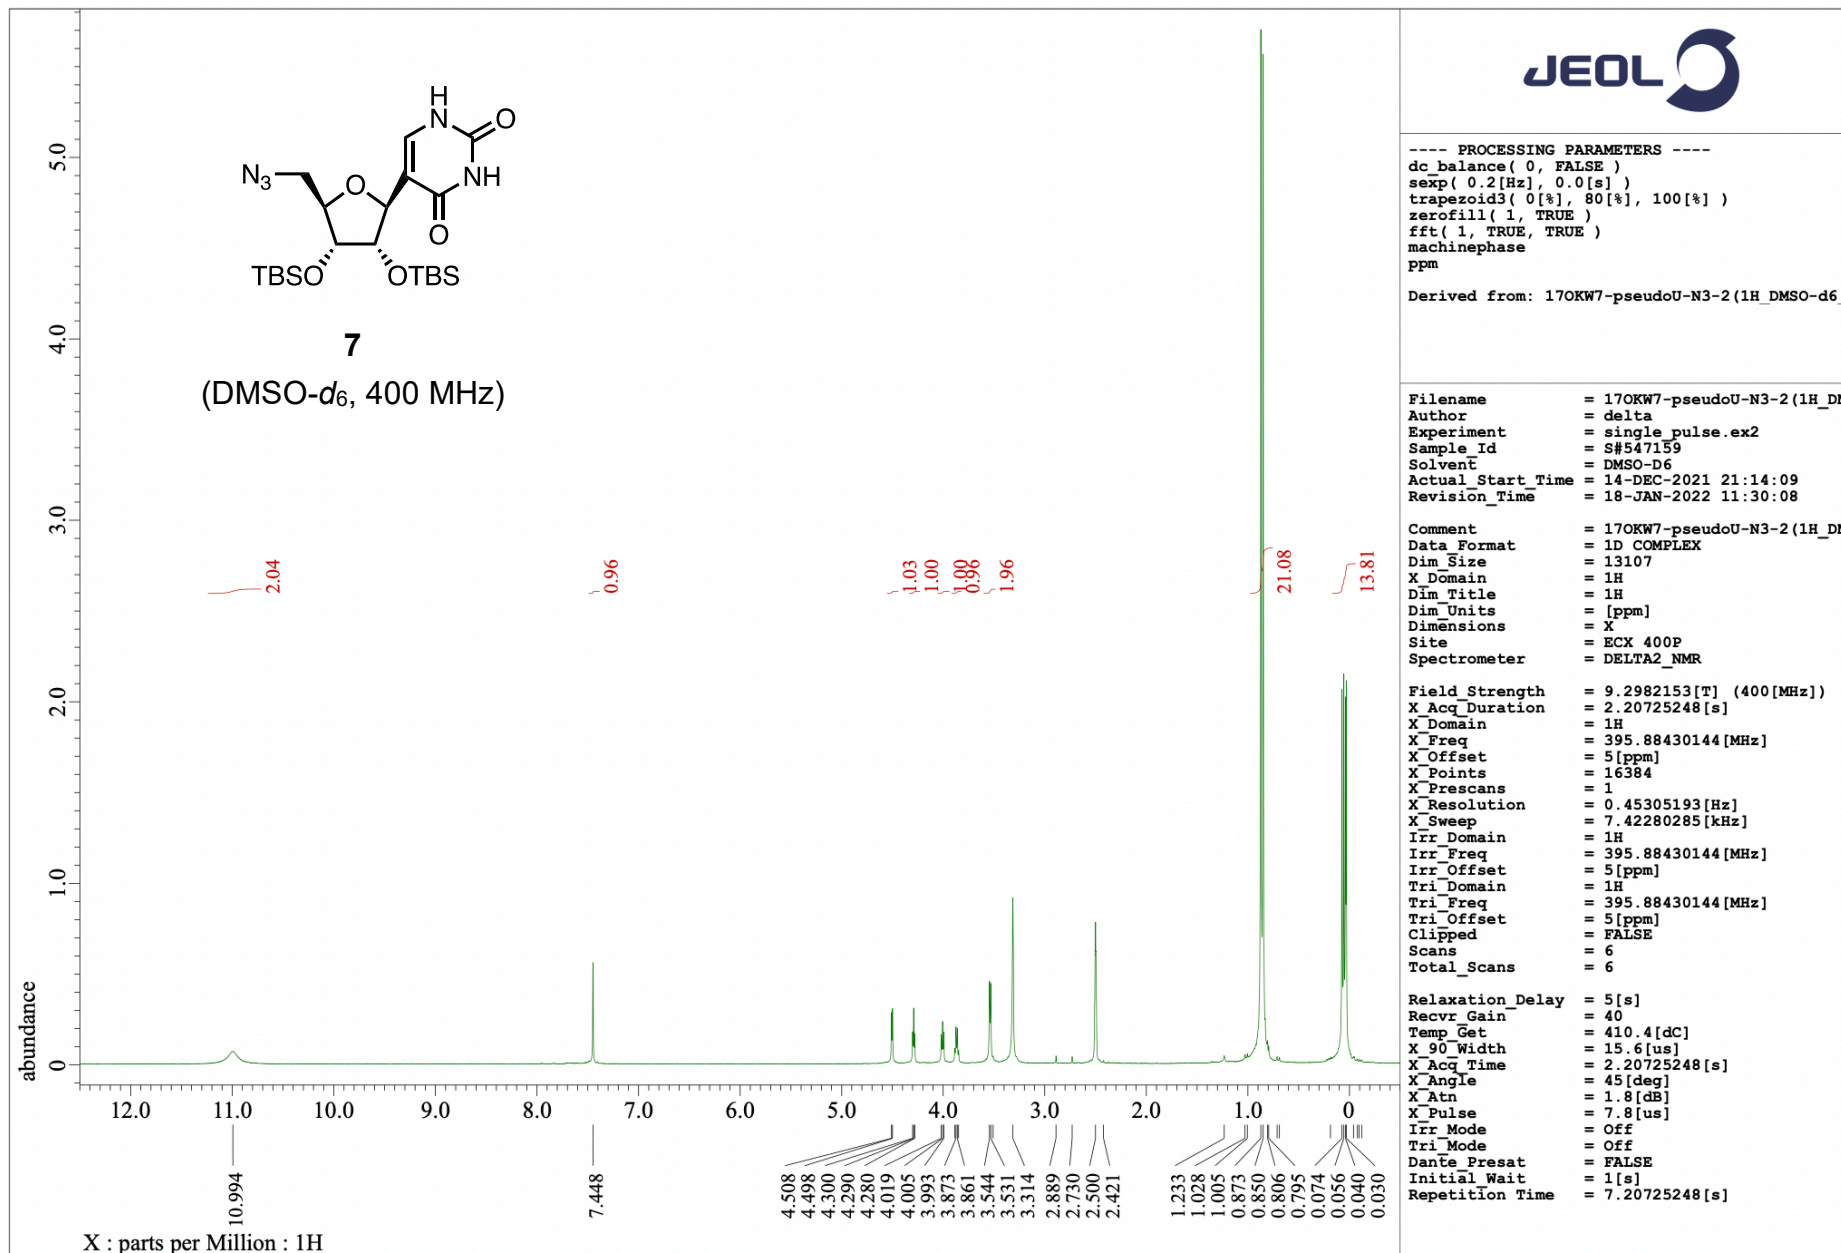



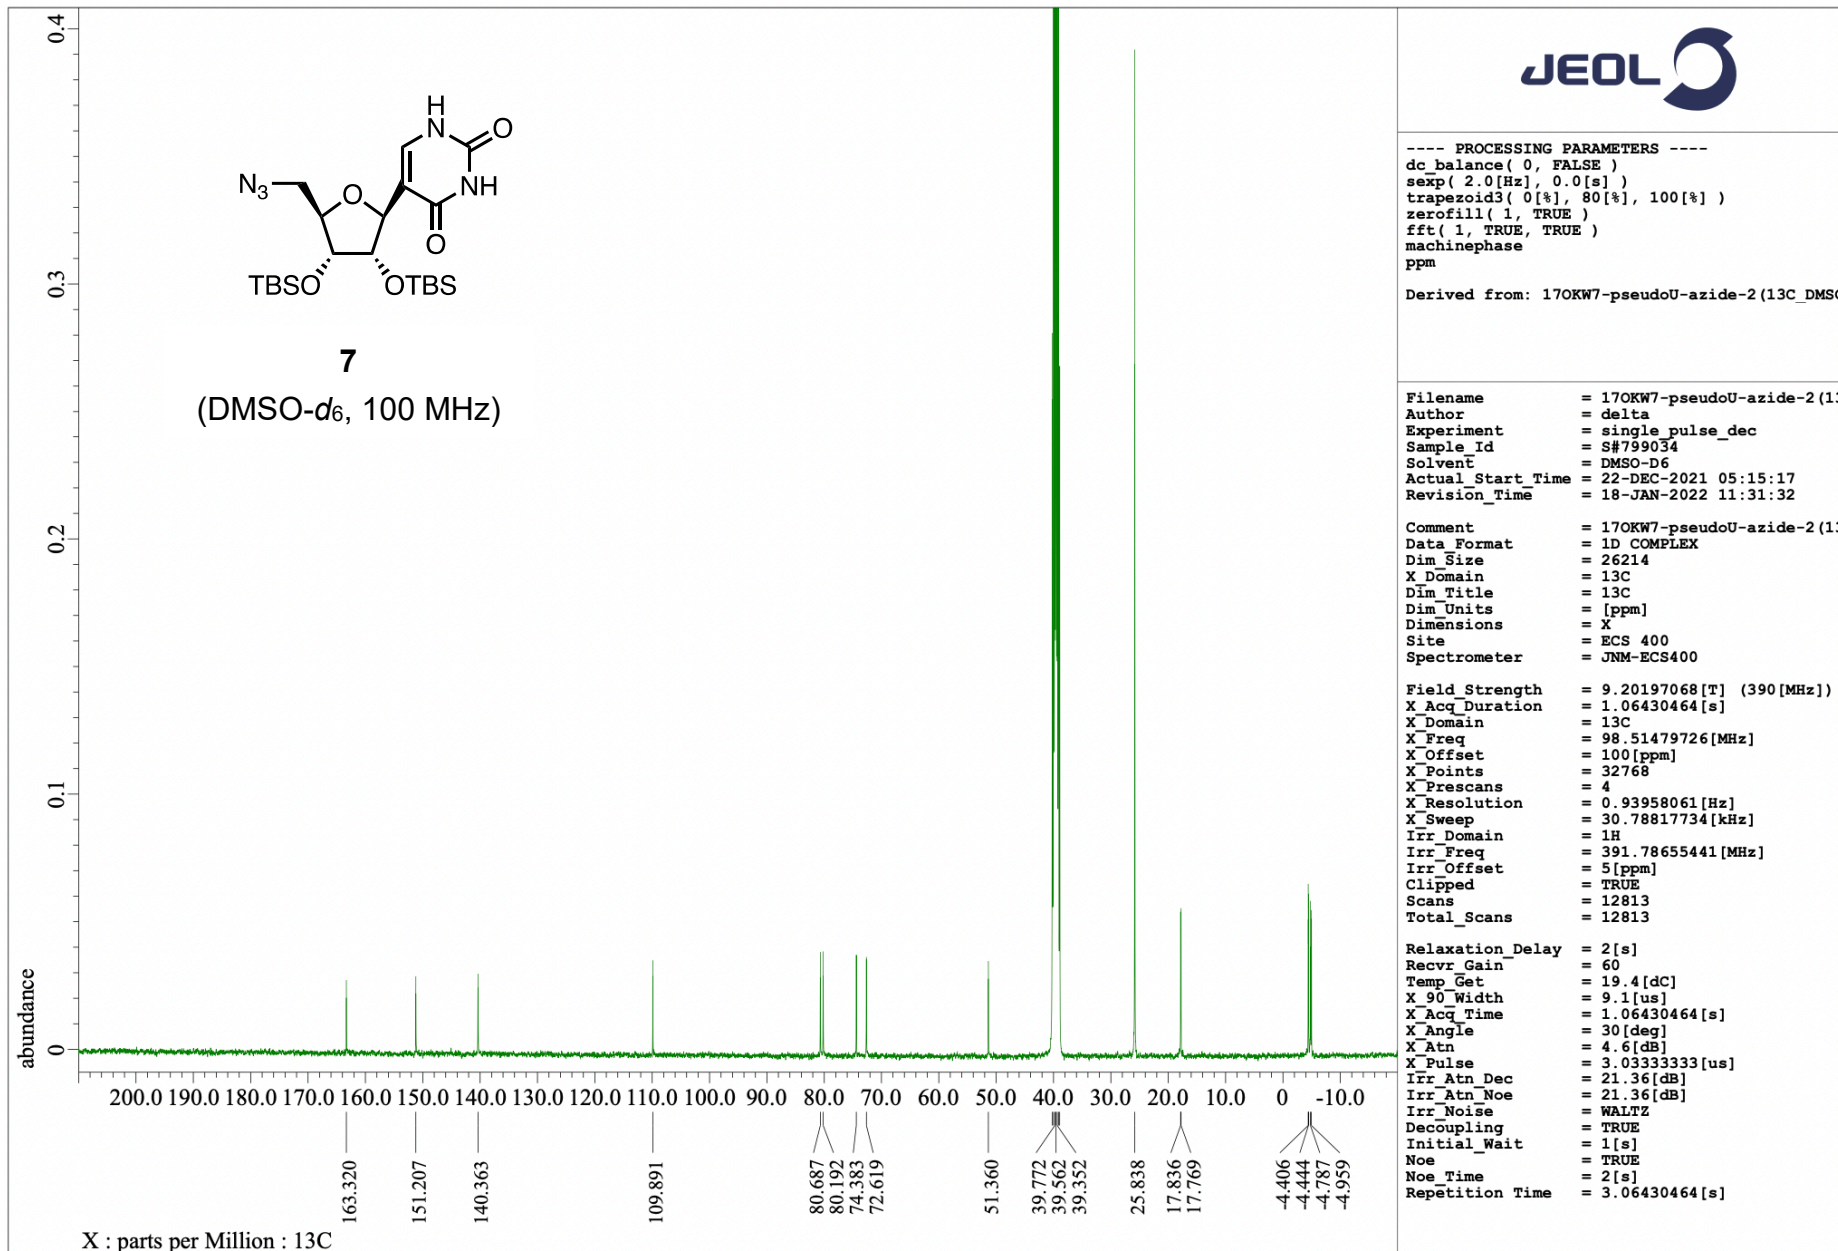

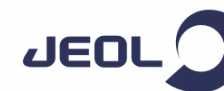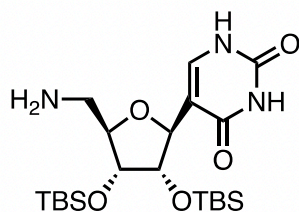

8

(DMSO-d<sub>6</sub>, 400 MHz)

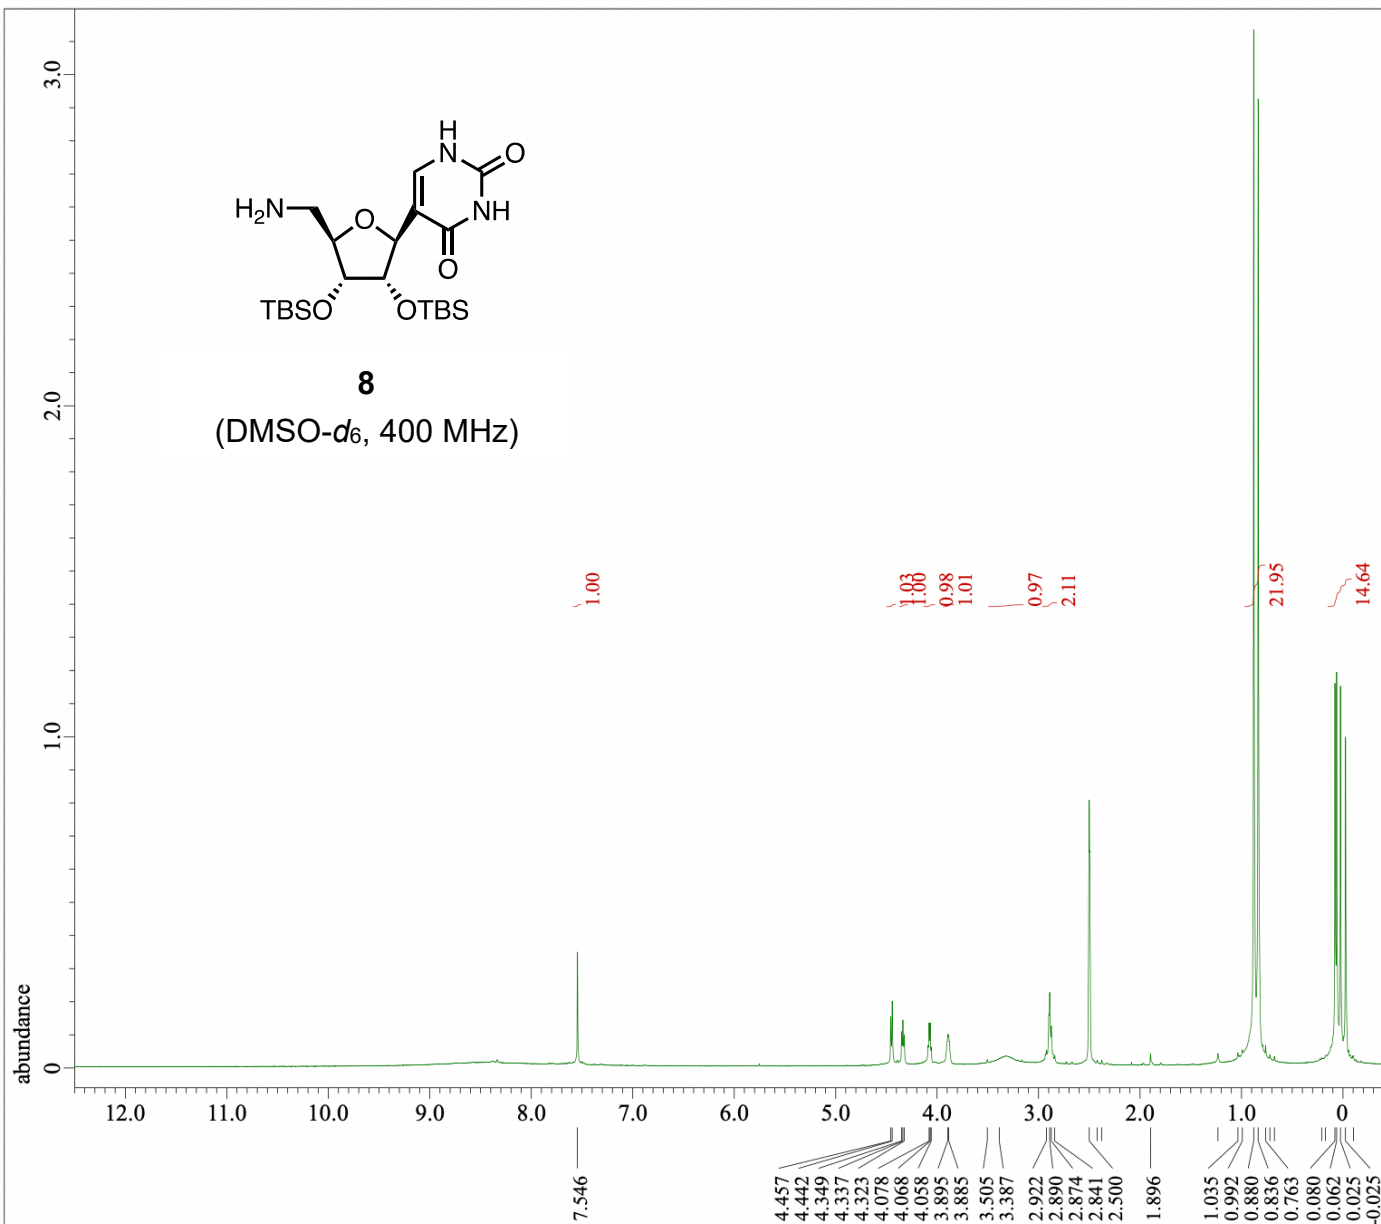

X : parts per Million : 1H

---- PROCESSING PARAMETERS ----

```
dc balance( 0, FALSE )
sexp( 0.2[Hz], 0.0[s] )
trapezoid3( 0[%], 80[%], 100[%] )
zerofill( 1, TRUE )
fft( 1, TRUE, TRUE )
machinephase
ppm
```

Derived from: 17OKW7-pseudoU-NH2-1(1H\_DMSO-d6)

```
Filename      = 17OKW7-pseudoU-NH2-1(1H_D
Author       = delta
Experiment    = single_pulse.ex2
Sample_Id    = S#550501
Solvent      = DMSO-D6
Actual_Start Time = 14-DEC-2021 21:19:57
Revision_Time = 18-JAN-2022 16:56:11
```

```
Comment      = 17OKW7-pseudoU-NH2-1(1H_D
Data_Format  = 1D COMPLEX
Dim_Size     = 13107
X_Domain     = 1H
Dim_Title    = 1H
Dim_Units    = [ppm]
Dimensions   = X
Site         = ECX 400P
Spectrometer = DELTA2_NMR
```

```
Field Strength = 9.2982153[T] (400[MHz])
X_Acq_Duration = 2.20725248[s]
X_Domain       = 1H
X_Freq         = 395.88430144[MHz]
X_Offset       = 5[ppm]
X_Points       = 16384
X_Prescans     = 1
X_Resolution  = 0.45305193[Hz]
X_Sweep        = 7.42280285[kHz]
Irr_Domain     = 1H
Irr_Freq       = 395.88430144[MHz]
Irr_Offset     = 5[ppm]
Tri_Domain     = 1H
Tri_Freq       = 395.88430144[MHz]
Tri_Offset     = 5[ppm]
Clipped        = FALSE
Scans          = 10
Total_Scans    = 10
```

```
Relaxation Delay = 5[s]
Recvr Gain       = 40
Temp_Get         = 410.4[dC]
X_90_Width       = 15.6[us]
X_Acq_Time       = 2.20725248[s]
X_Angle          = 45[deg]
X_Attn           = 1.8[dB]
X_Pulse          = 7.8[us]
Irr_Mode         = Off
Tri_Mode         = Off
Dante_Preset     = FALSE
Initial_Wait     = 1[s]
Repetition Time  = 7.20725248[s]
```

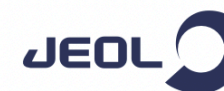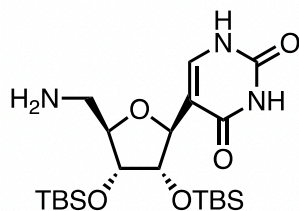

8

(DMSO-*d*<sub>6</sub>, 100 MHz)

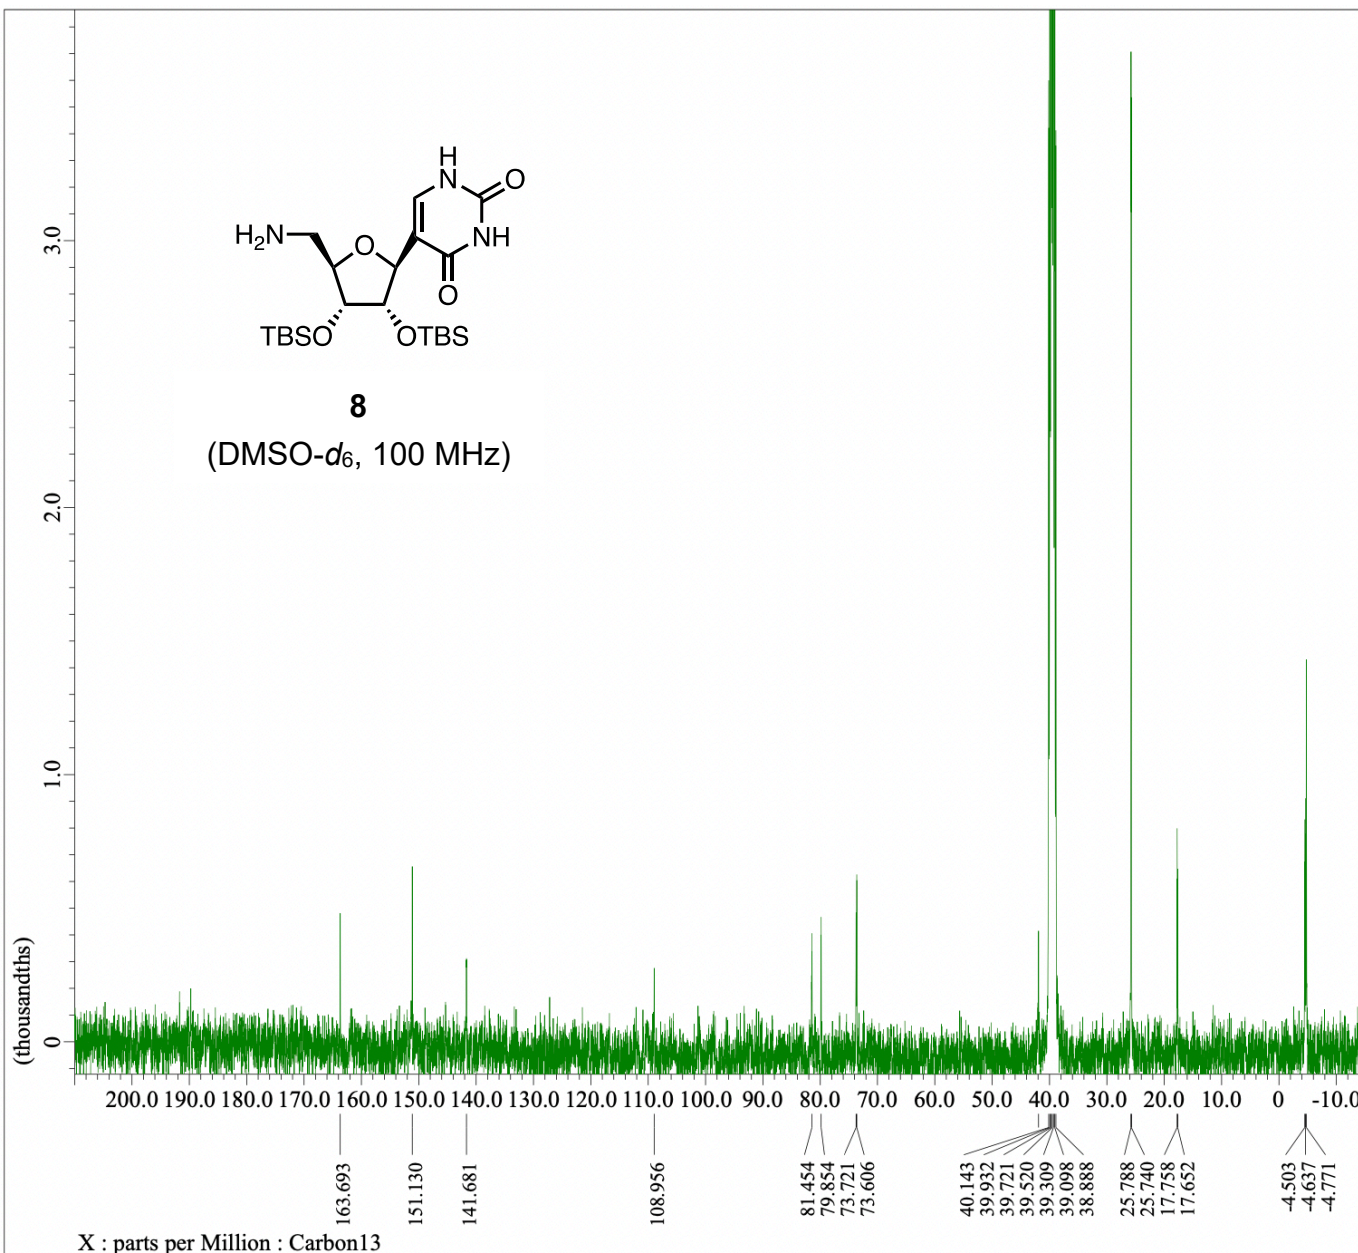

X : parts per Million : Carbon13

---- PROCESSING PARAMETERS ----  
sexp( 2.0[Hz], 0.0[s] )  
trapezoid( 0[%], 0[%], 80[%], 100[%] )  
zerofill( 1, TRUE )  
fft( 1, TRUE, TRUE )  
machinphase  
ppm

Derived from: 17OKW7-pseudoU-NH2-1(13C\_DMSO-d

Filename = 17OKW7-pseudoU-NH2  
Author = delta  
Experiment = single\_pulse\_dec.j  
Sample\_Id = a  
Solvent = DMSO-D6  
Actual\_Start\_Time = 14-DEC-2021 16:40:  
Revision\_Time = 18-JAN-2022 19:12:

Comment = 17OKW7-pseudoU-NH2  
Data\_Format = 1D COMPLEX  
Dim\_Size = 26214  
X\_Domain = Carbon13  
Dim\_Title = Carbon13  
Dim\_Units = [ppm]  
Dimensions = X  
Spectrometer = JNM-ECZ400S/L1

Field\_Strength = 9.389766[T] (400[M  
X\_Acq\_Duration = 1.03809024[s]  
X\_Domain = Carbon13  
X\_Freq = 100.52530333[MHz]  
X\_Offset = 100[ppm]  
X\_Points = 32768  
X\_Prescans = 4  
X\_Resolution = 0.96330739[Hz]  
X\_Sweep = 31.56565657[kHz]  
X\_Sweep\_Clippped = 25.25252525[kHz]  
Irr\_Domain = Proton  
Irr\_Freq = 399.78219838[MHz]  
Irr\_Offset = 5[ppm]  
Blanking = 5[us]  
Clipped = FALSE  
Scans = 567  
Total\_Scans = 567

Relaxation\_Delay = 2[s]  
Recvr\_Gain = 56  
Temp\_Get = 25.7[dc]  
X\_90\_Width = 10.3[us]  
X\_Acq\_Time = 1.03809024[s]  
X\_Angle = 30[deg]  
X\_Atn = 8[db]  
X\_Pulse = 3.43333333[us]  
Irr\_Atn\_Dec = 29.437[db]  
Irr\_Atn\_Dec\_Calc = 29.437[db]  
Irr\_Atn\_Dec\_Default\_Calc = 29.437[db]  
Irr\_Atn\_No = 29.437[db]  
Irr\_Dec\_Bandwidth\_Hz = 4.7826087[kHz]  
Irr\_Dec\_Bandwidth\_Ppm = 11.96303566[ppm]  
Irr\_Dec\_Freq = 399.78219838[MHz]  
Irr\_Dec\_Merit\_Factor = 2.2  
Irr\_Decoupling = TRUE  
Irr\_No = TRUE

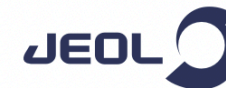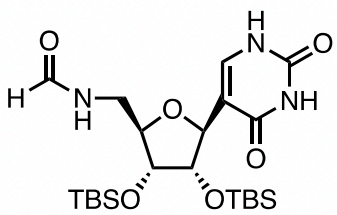

9

(DMSO-d<sub>6</sub>, 400 MHz)

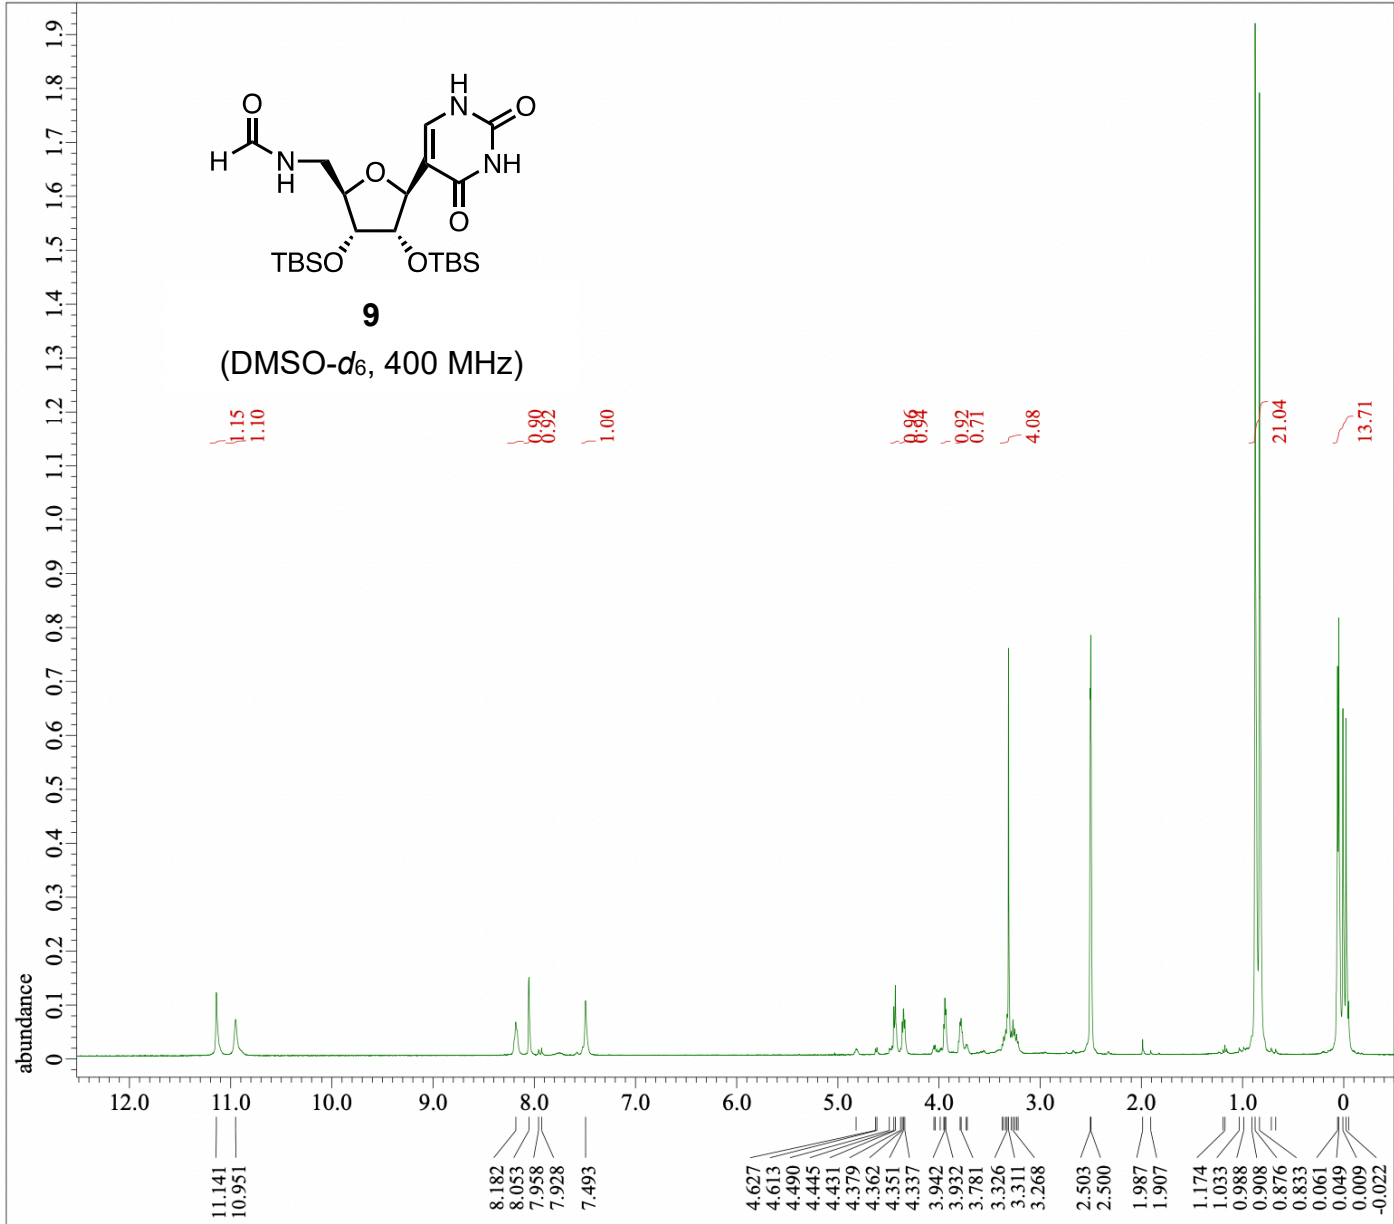

X : parts per Million : 1H

----- PROCESSING PARAMETERS -----  
dc balance( 0, FALSE )  
sexp( 0.2[Hz], 0.0[s] )  
trapezoid3( 0[%], 80[%], 100[%] )  
zerofill( 1, TRUE )  
fft( 1, TRUE, TRUE )  
machinephase  
ppm

Derived from: 17OKW7-pseudoU-formamide-1(1H\_D

Filename = 17OKW7-pseudoU-formamide-  
Author = delta  
Experiment = single\_pulse.ex2  
Sample Id = S#554044  
Solvent = DMSO-D6  
Actual\_Start Time = 14-DEC-2021 21:25:52  
Revision\_Time = 18-JAN-2022 19:17:44

Comment = 17OKW7-pseudoU-formamide-  
Data Format = 1D COMPLEX  
Dim Size = 13107  
X Domain = 1H  
Dim Title = 1H  
Dim Units = [ppm]  
Dimensions = X  
Site = ECX 400P  
Spectrometer = DELTA2\_NMR

Field Strength = 9.2982153[T] (400[MHz])  
X Acq\_Duration = 2.20725248[s]  
X Domain = 1H  
X Freq = 395.88430144[MHz]  
X Offset = 5[ppm]  
X Points = 16384  
X\_Prescans = 1  
X Resolution = 0.45305193[Hz]  
X Sweep = 7.42280285[kHz]  
Irr\_Domain = 1H  
Irr\_Freq = 395.88430144[MHz]  
Irr\_Offset = 5[ppm]  
Tri\_Domain = 1H  
Tri\_Freq = 395.88430144[MHz]  
Tri\_Offset = 5[ppm]  
Clipped = FALSE  
Scans = 12  
Total\_Scans = 12

Relaxation\_Delay = 5[s]  
Recvr Gain = 40  
Temp\_Get = 410.4[dC]  
X\_90\_Width = 15.6[us]  
X Acq Time = 2.20725248[s]  
X\_Angle = 45[deg]  
X\_Atn = 1.8[dB]  
X\_Pulse = 7.8[us]  
Irr\_Mode = off  
Tri\_Mode = off  
Dante\_Preset = FALSE  
Initial Wait = 1[s]  
Repetition Time = 7.20725248[s]

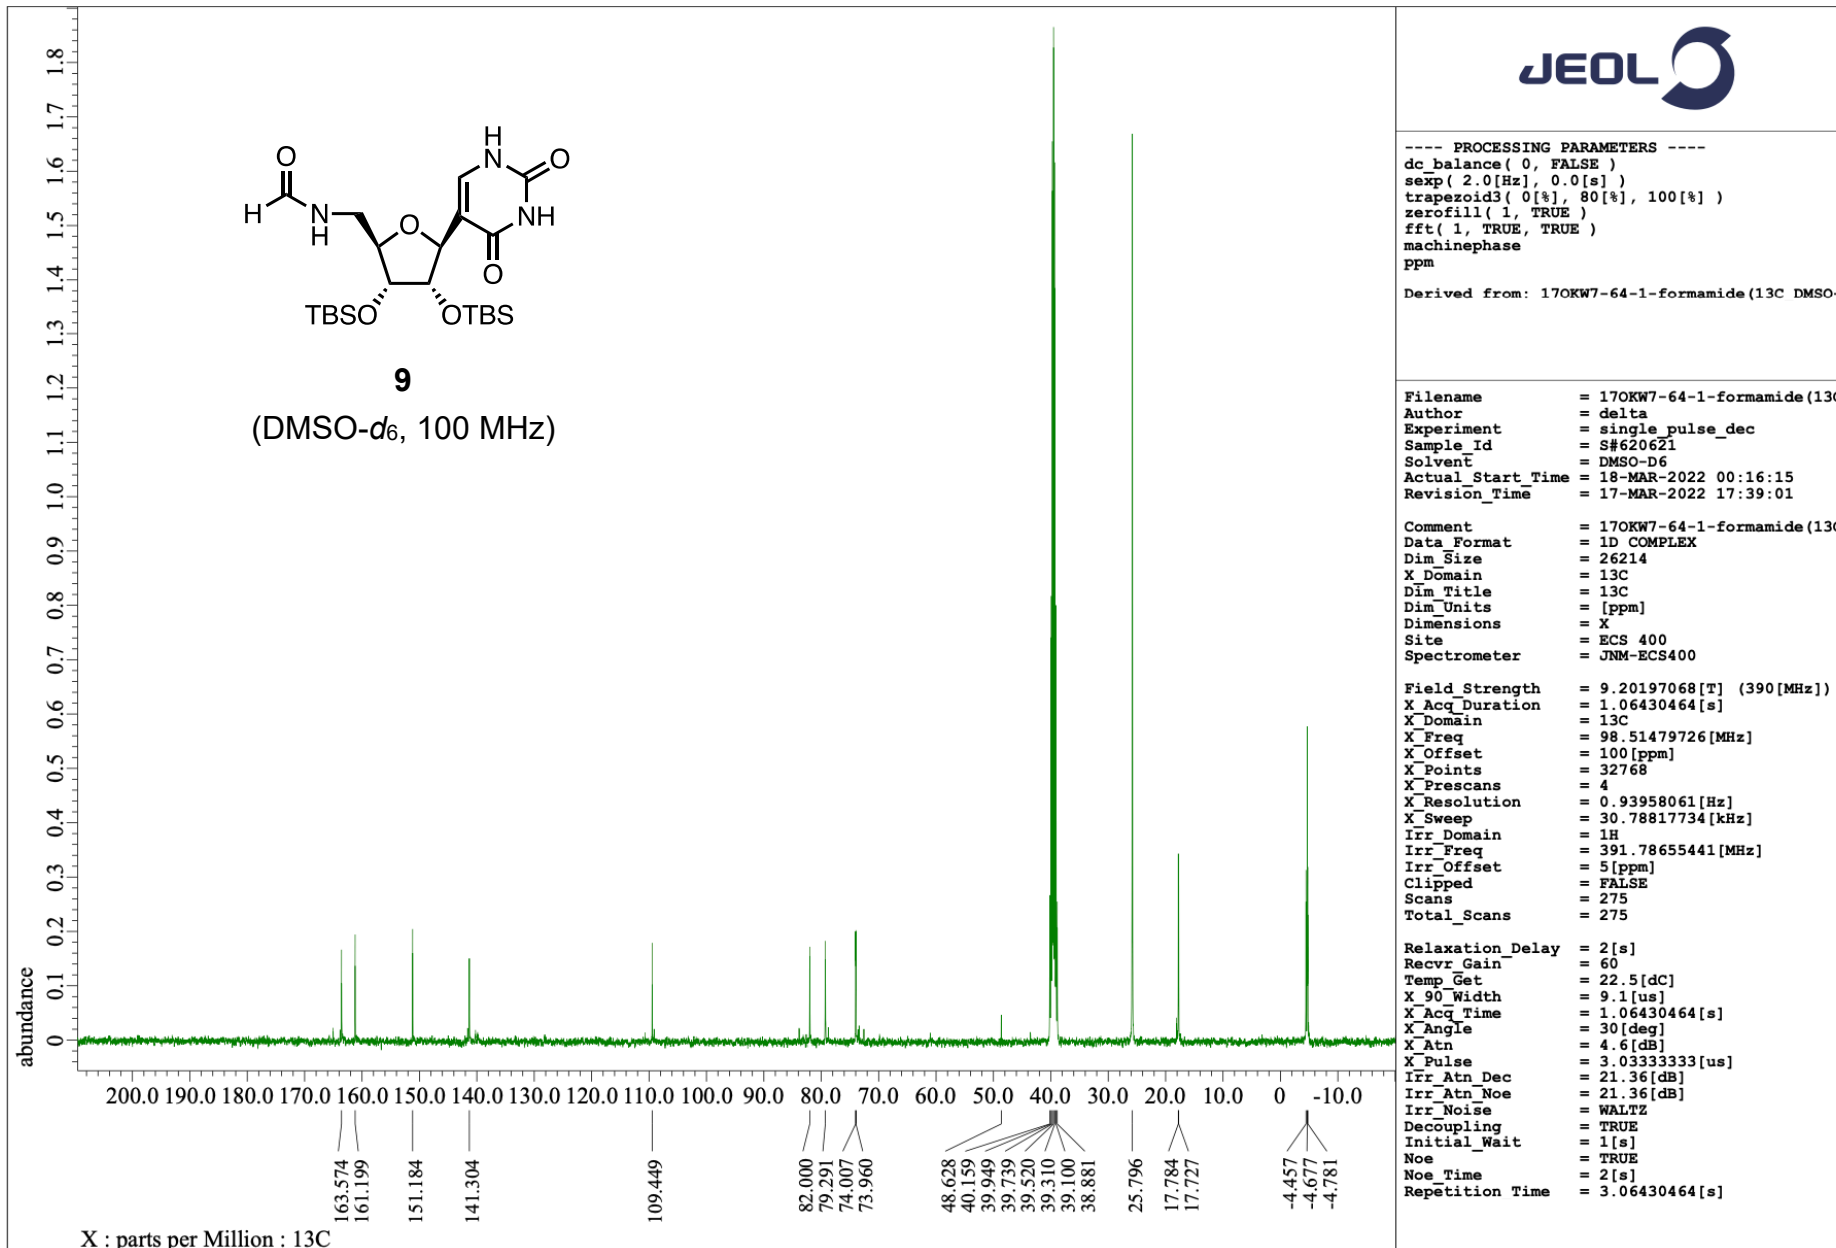

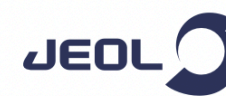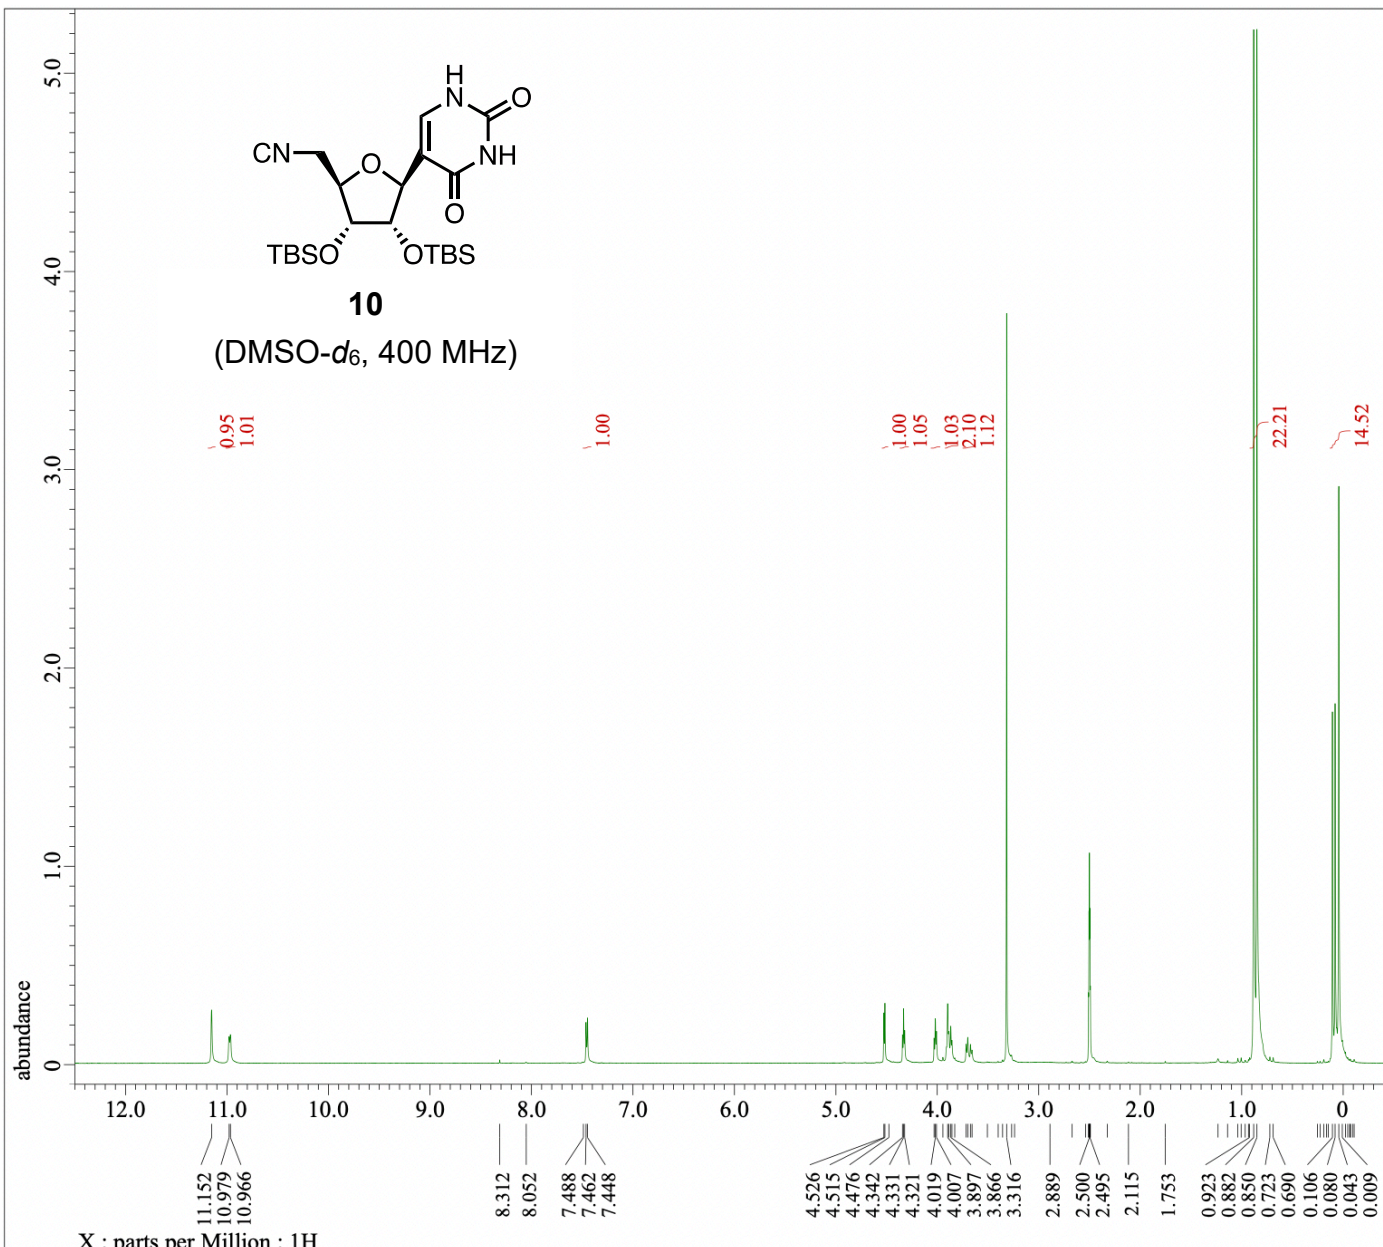

---- PROCESSING PARAMETERS ----  
dc balance( 0, FALSE )  
sexp( 0.2[Hz], 0.0[s] )  
trapezoid3( 0[%], 80[%], 100[%] )  
zerofill( 1, TRUE )  
fft( 1, TRUE, TRUE )  
machinephase  
ppm  
Derived from: 17OKW7-pseudoU-isocyanide-1(1H\_

Filename = 17OKW7-pseudoU-isocyanide  
Author = delta  
Experiment = single\_pulse.ex2  
Sample Id = S#534978  
Solvent = DMSO-D6  
Actual\_Start Time = 12-JAN-2022 20:46:36  
Revision\_Time = 19-JAN-2022 19:40:50  
Comment = 17OKW7-pseudoU-isocyanide  
Data\_Format = 1D COMPLEX  
Dim\_Size = 13107  
X\_Domain = 1H  
Dim\_Title = 1H  
Dim\_Units = [ppm]  
Dimensions = X  
Site = ECX 400P  
Spectrometer = DELTA2\_NMR  
Field\_Strength = 9.2982153[T] (400[MHz])  
X\_Acq\_Duration = 2.20725248[s]  
X\_Domain = 1H  
X\_Freq = 395.88430144[MHz]  
X\_Offset = 5[ppm]  
X\_Points = 16384  
X\_Prescans = 1  
X\_Resolution = 0.45305193[Hz]  
X\_Sweep = 7.42280285[kHz]  
Irr\_Domain = 1H  
Irr\_Freq = 395.88430144[MHz]  
Irr\_Offset = 5[ppm]  
Tri\_Domain = 1H  
Tri\_Freq = 395.88430144[MHz]  
Tri\_Offset = 5[ppm]  
Clipped = FALSE  
Scans = 14  
Total\_Scans = 14  
Relaxation\_Delay = 5[s]  
Recvr\_Gain = 40  
Temp\_Get = 411.1[dC]  
X\_90\_Width = 15.6[us]  
X\_Acq\_Time = 2.20725248[s]  
X\_Angle = 45[deg]  
X\_Atn = 1.8[dB]  
X\_Pulse = 7.8[us]  
Irr\_Mode = Off  
Tri\_Mode = Off  
Dante\_Preset = FALSE  
Initial\_Wait = 1[s]  
Repetition\_Time = 7.20725248[s]

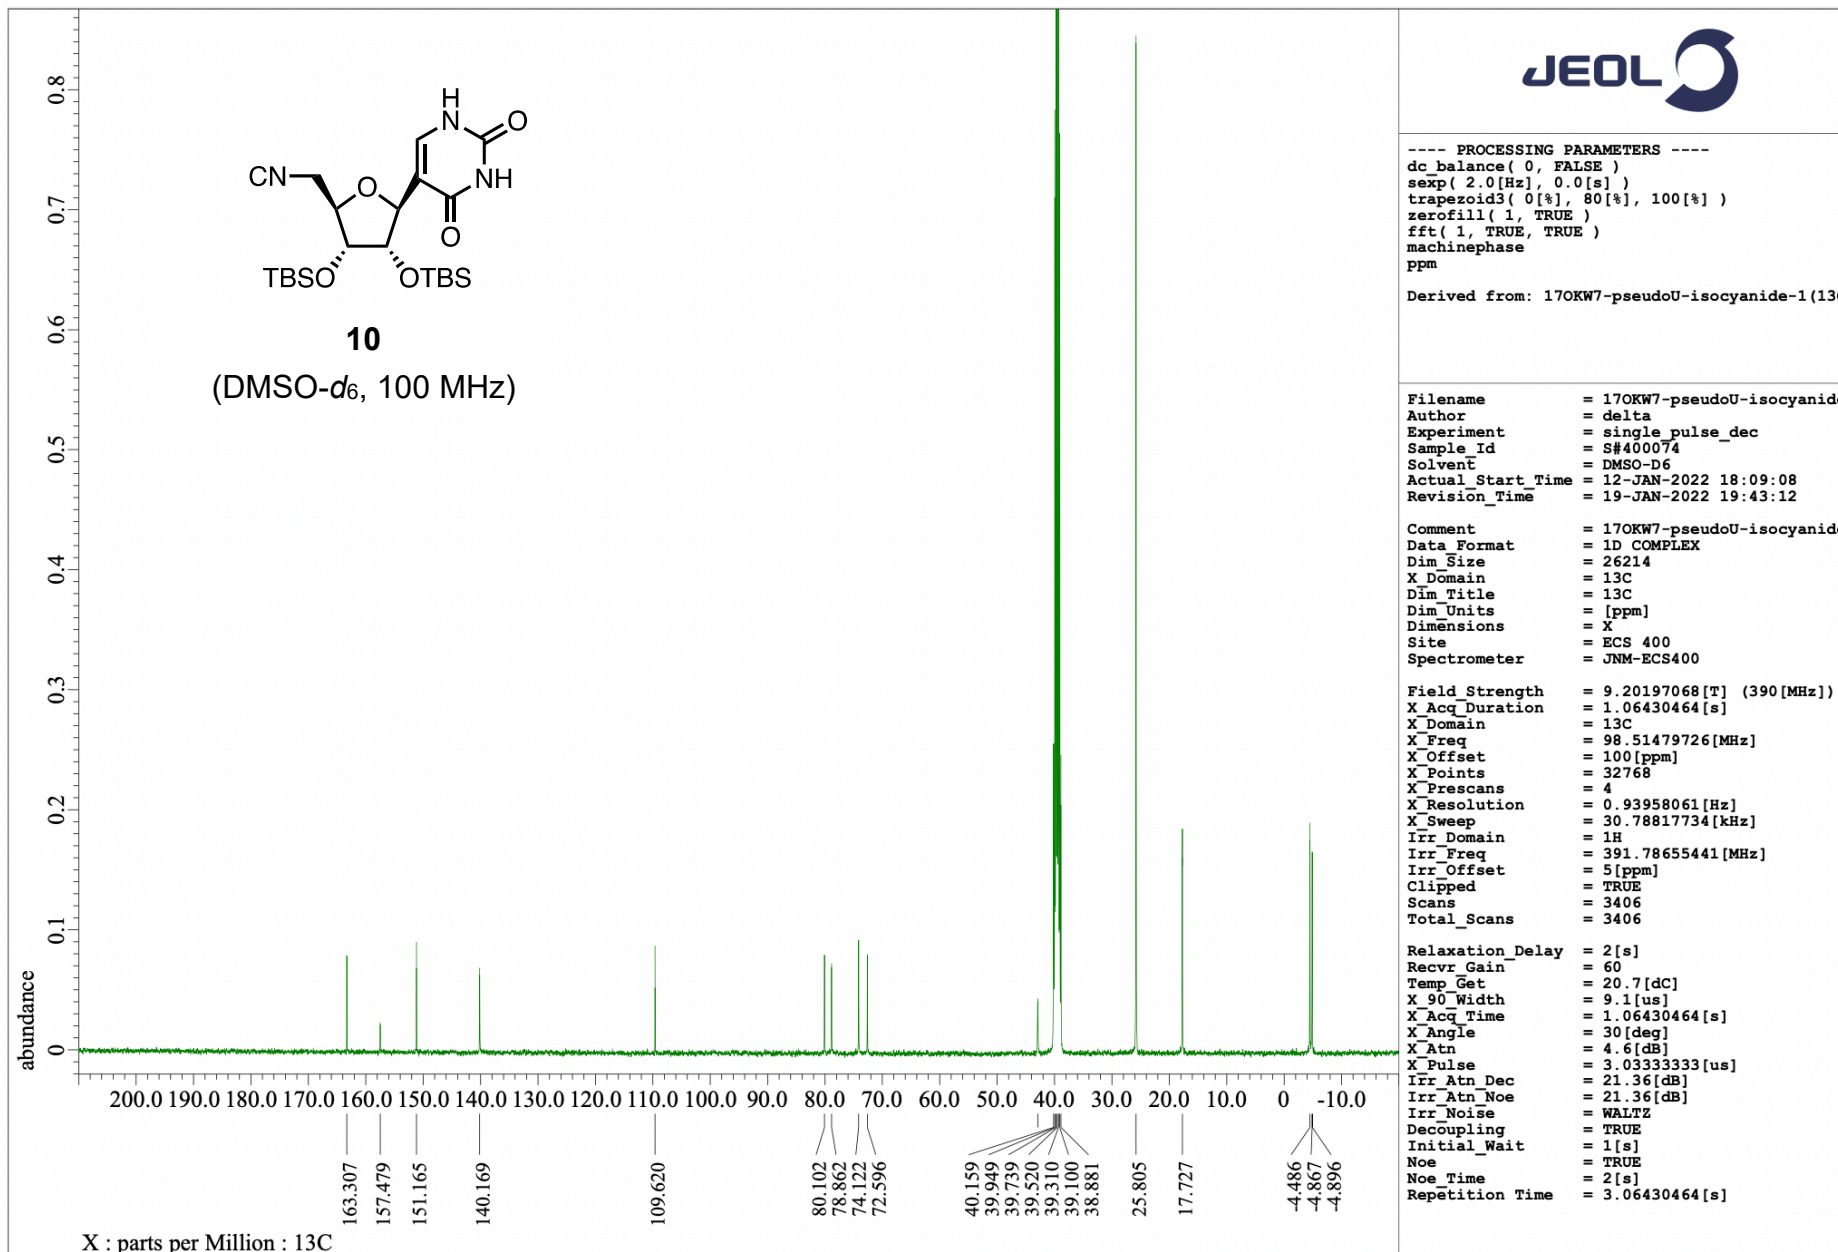

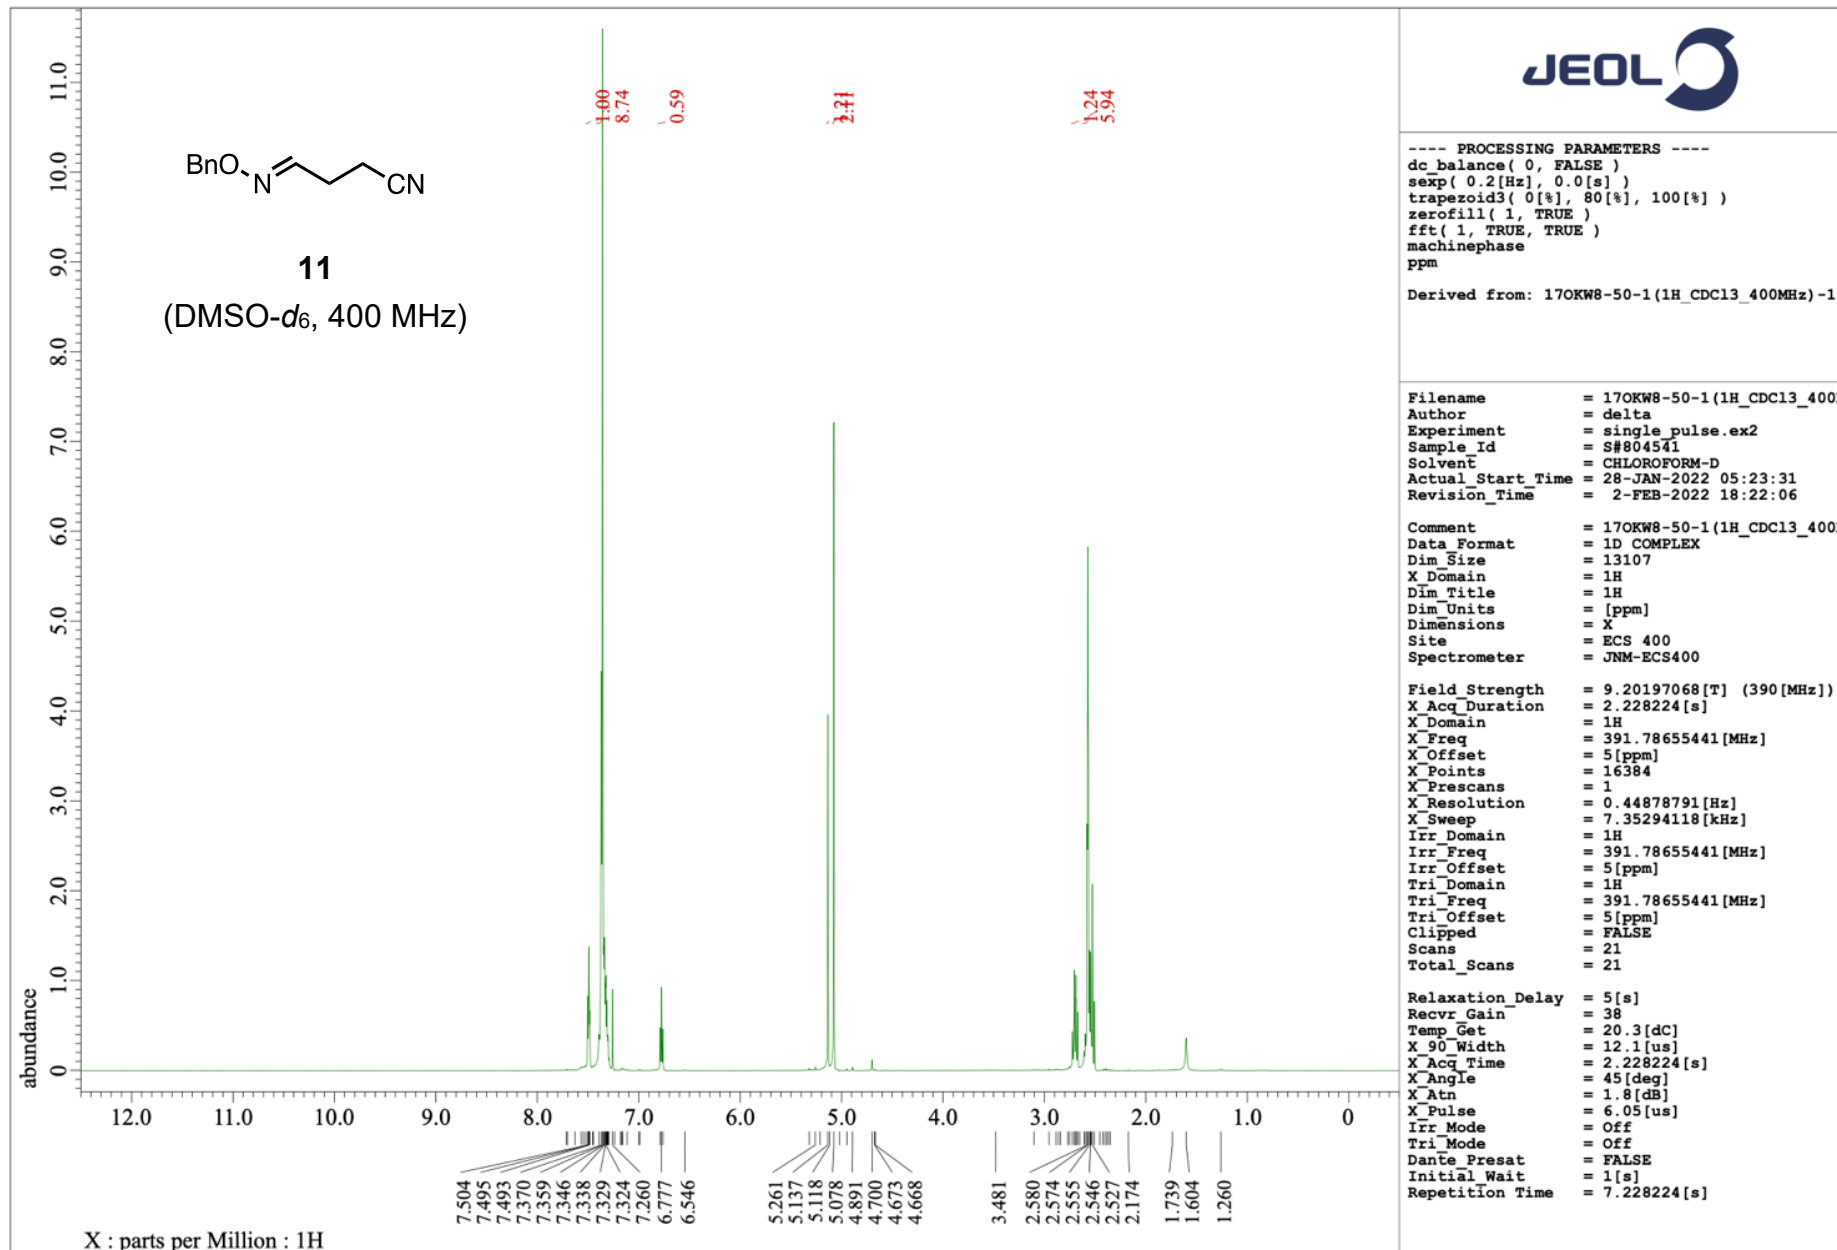



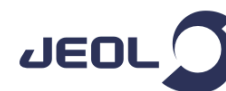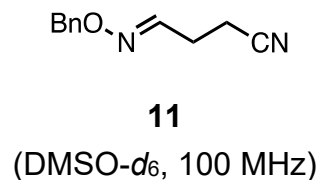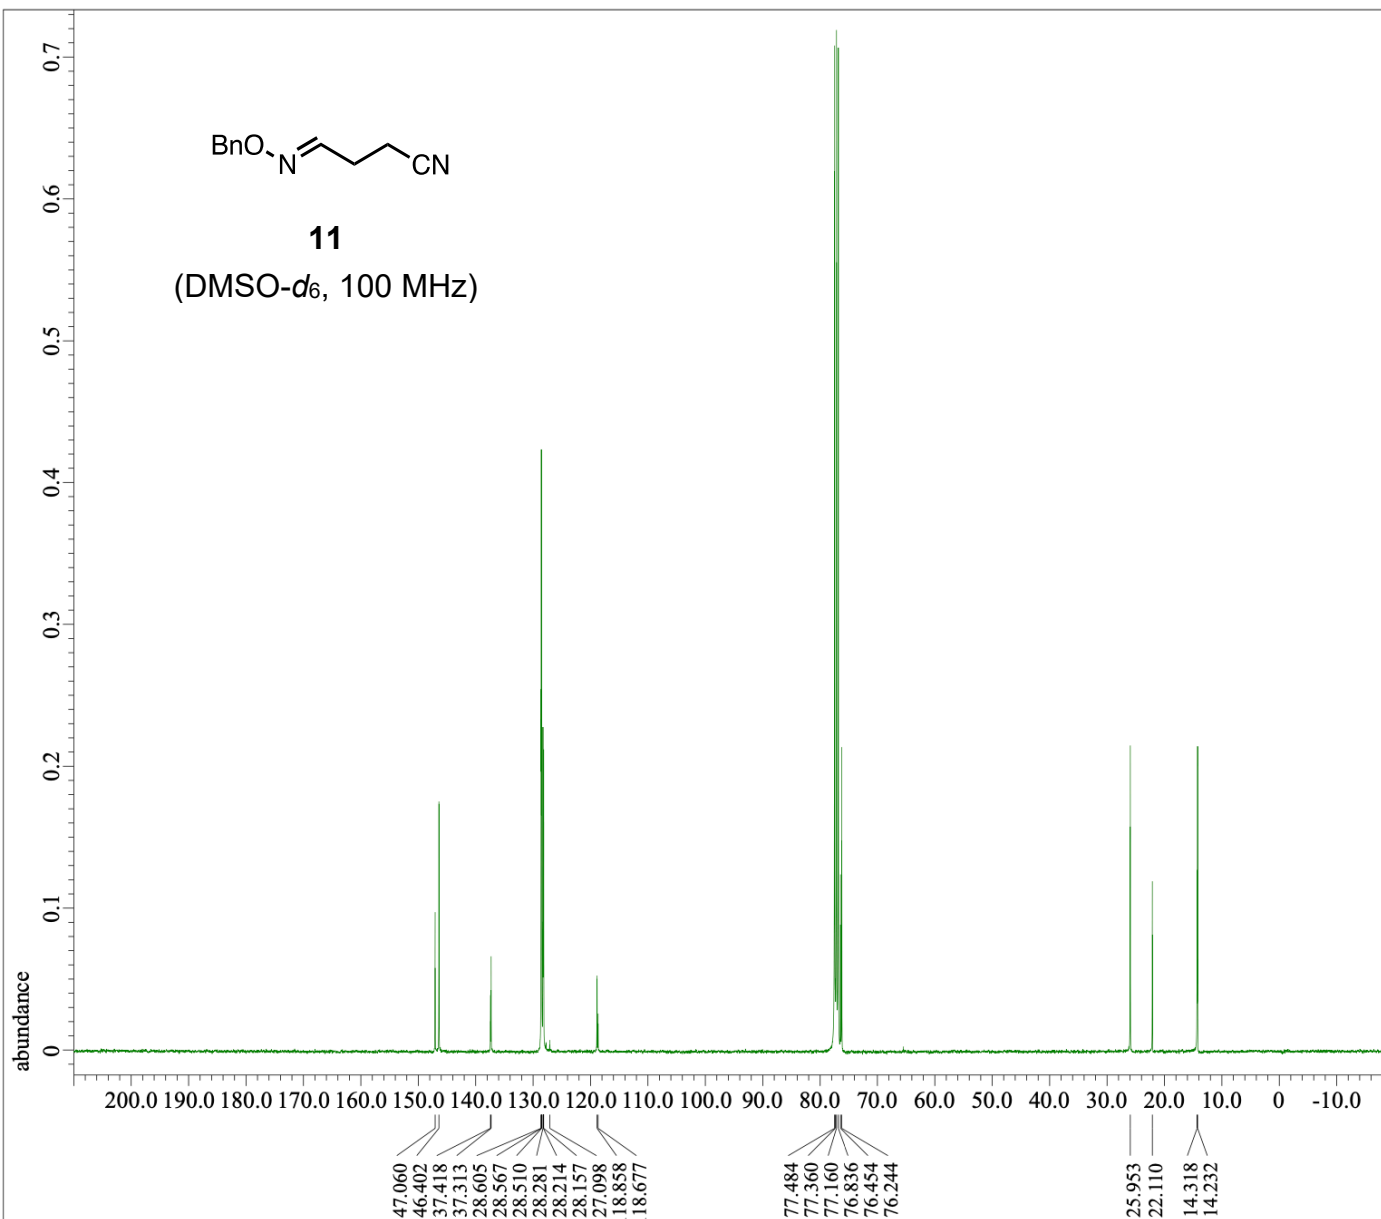

X : parts per Million : 13C

---- PROCESSING PARAMETERS ----

```
dc balance( 0, FALSE )
sexp( 2.0[Hz], 0.0[s] )
trapezoid3( 0[%], 80[%], 100[%] )
zerofill( 1, TRUE )
fft( 1, TRUE, TRUE )
machinephase
ppm
```

Derived from: 17OKW8-50-1(13C\_CDC13\_400MHz)-1

```
Filename      = 17OKW8-50-1(13C_CDC13_400
Author        = delta
Experiment    = single_pulse_dec
Sample_Id     = S#808586
Solvent       = CHLOROFORM-D
Actual_Start Time = 28-JAN-2022 05:29:47
Revision_Time  = 2-FEB-2022 18:25:30

Comment       = 17OKW8-50-1(13C_CDC13_400
Data_Format   = 1D COMPLEX
Dim_Size      = 26214
X_Domain      = 13C
Dim_Title     = 13C
Dim_Units     = [ppm]
Dimensions    = X
Site          = ECS 400
Spectrometer  = JNM-ECS400

Field Strength = 9.20197068[T] (390[MHz])
X_Acq_Duration = 1.06430464[s]
X_Domain       = 13C
X_Freq         = 98.51479726[MHz]
X_Offset       = 100[ppm]
X_Points       = 32768
X_Prescans     = 4
X_Resolution   = 0.93958061[Hz]
X_Sweep        = 30.78817734[kHz]
Irr_Domain     = 1H
Irr_Freq       = 391.78655441[MHz]
Irr_Offset     = 5[ppm]
Clipped        = TRUE
Scans          = 12975
Total_Scans    = 12975

Relaxation Delay = 2[s]
Recvr Gain       = 60
Temp_Get         = 19.9[dC]
X_90_Width      = 9.1[us]
X_Acq_Time      = 1.06430464[s]
X_Angle         = 30[deg]
X_Atn           = 4.6[dB]
X_Pulse         = 3.03333333[us]
Irr_Atn_Dec     = 21.36[dB]
Irr_Atn_No     = 21.36[dB]
Irr_Noise       = WALTZ
Decoupling      = TRUE
Initial_Wait    = 1[s]
Noe             = TRUE
Noe_Time        = 2[s]
Repetition Time = 3.06430464[s]
```



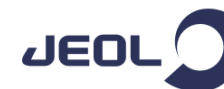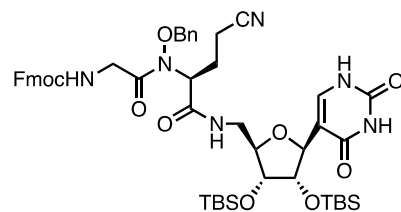

**13**

(DMSO-*d*<sub>6</sub>, 100 MHz)

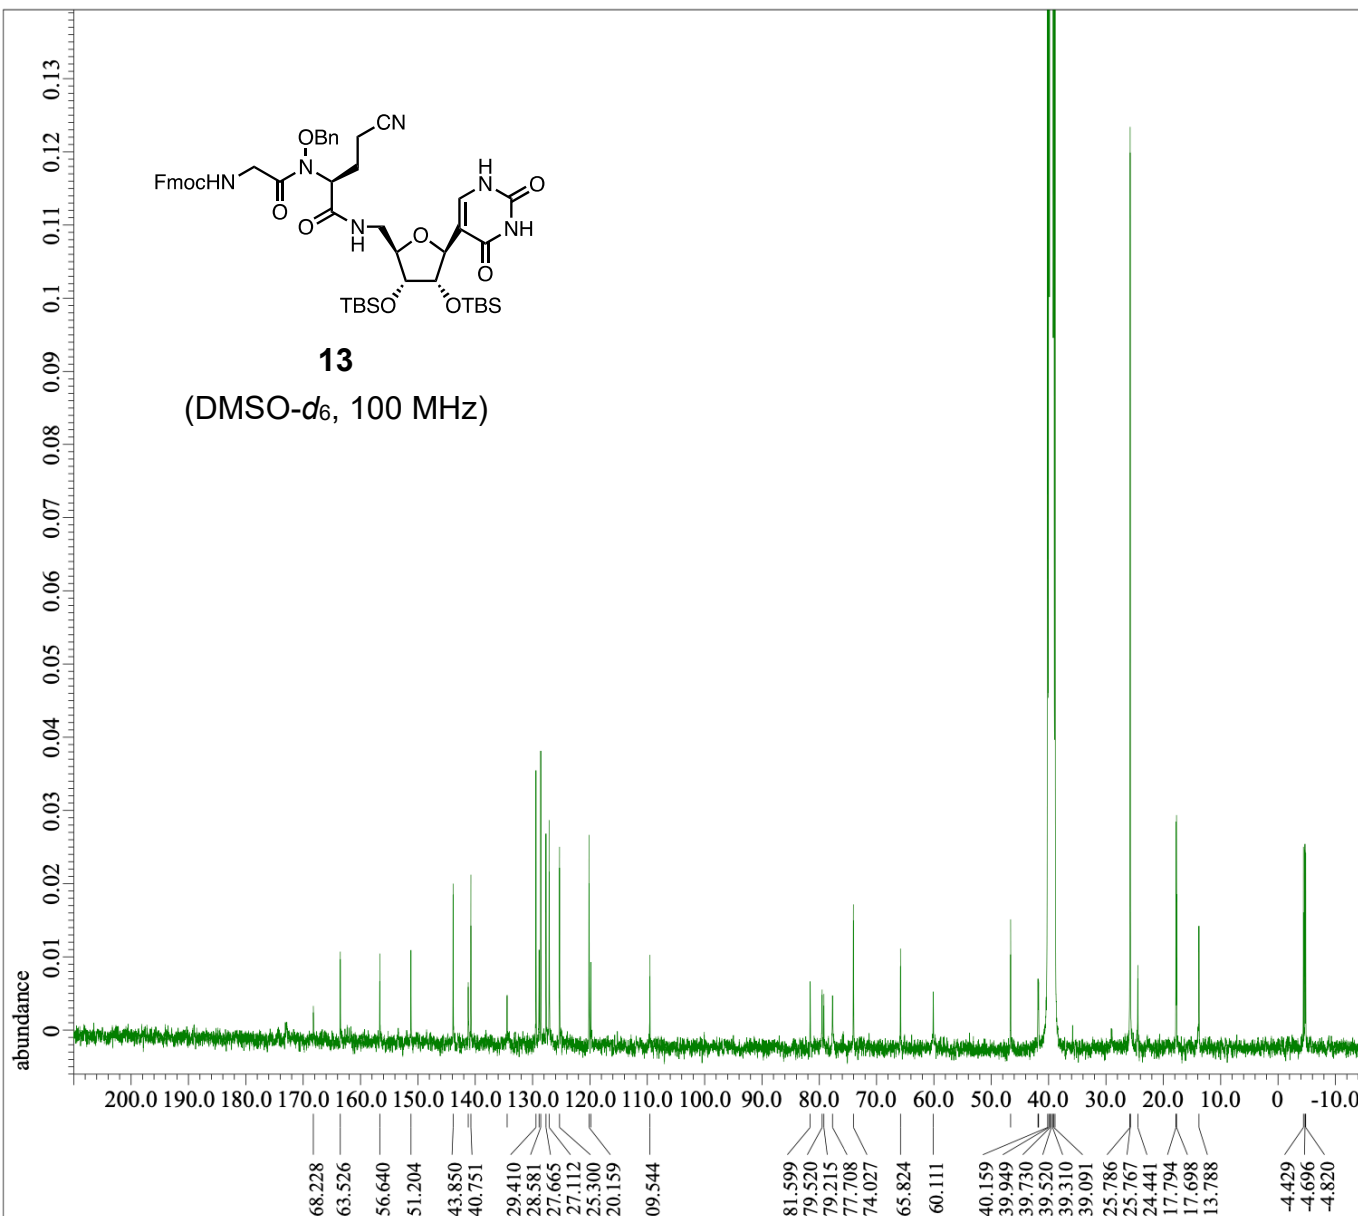

X : parts per Million : 13C

---- PROCESSING PARAMETERS ----

```
dc balance( 0, FALSE )
sexp( 2.0[Hz], 0.0[s] )
trapezoid3( 0[%], 80[%], 100[%] )
zerofill( 1, TRUE )
fft( 1, TRUE, TRUE )
machinephase
ppm
```

Derived from: 17OKW8-38-1-LP(13C\_DMSO-d6\_400M

```
Filename      = 17OKW8-38-1-LP(13C_DMSO-d
Author       = delta
Experiment    = single_pulse_dec
Sample_Id    = S#825131
Solvent      = DMSO-D6
Actual_Start_Time = 21-JAN-2022 05:57:28
Revision_Time  = 3-FEB-2022 17:50:29
```

```
Comment      = 17OKW8-38-1-LP(13C_DMSO-d
Data_Format   = 1D COMPLEX
Dim_Size     = 26214
X_Domain     = 13C
Dim_Title    = 13C
Dim_Units    = [ppm]
Dimensions   = X
Site         = ECS 400
Spectrometer = JNM-ECS400
```

```
Field Strength = 9.20197068[T] (390 [MHz])
X_Acq_Duration = 1.06430464[s]
X_Domain      = 13C
X_Freq       = 98.51479726 [MHz]
X_Offset     = 100 [ppm]
X_Points     = 32768
X_Prescans   = 4
X_Resolution = 0.93958061 [Hz]
X_Sweep      = 30.78817734 [kHz]
Irr_Domain   = 1H
Irr_Freq     = 391.78655441 [MHz]
Irr_Offset   = 5 [ppm]
Clipped     = TRUE
Scans       = 11015
Total_Scans = 11015
```

```
Relaxation_Delay = 2 [s]
Recvr_Gain       = 60
Temp_Get        = 19.2 [dC]
X_90_Width     = 9.1 [us]
X_Acq_Time     = 1.06430464 [s]
X_Angle        = 30 [deg]
X_Atn          = 4.6 [dB]
X_Pulse        = 3.03333333 [us]
Irr_Atn_Dec    = 21.36 [dB]
Irr_Atn_Noise = 21.36 [dB]
Irr_Noise     = WALTZ
Decoupling     = TRUE
Initial_Wait   = 1 [s]
Noe            = TRUE
Noe_Time       = 2 [s]
Repetition_Time = 3.06430464 [s]
```

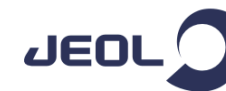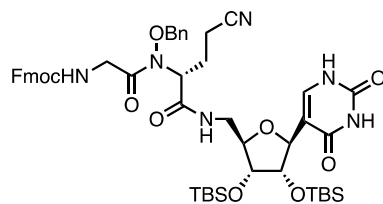

14

(DMSO-d<sub>6</sub>, 400 MHz)

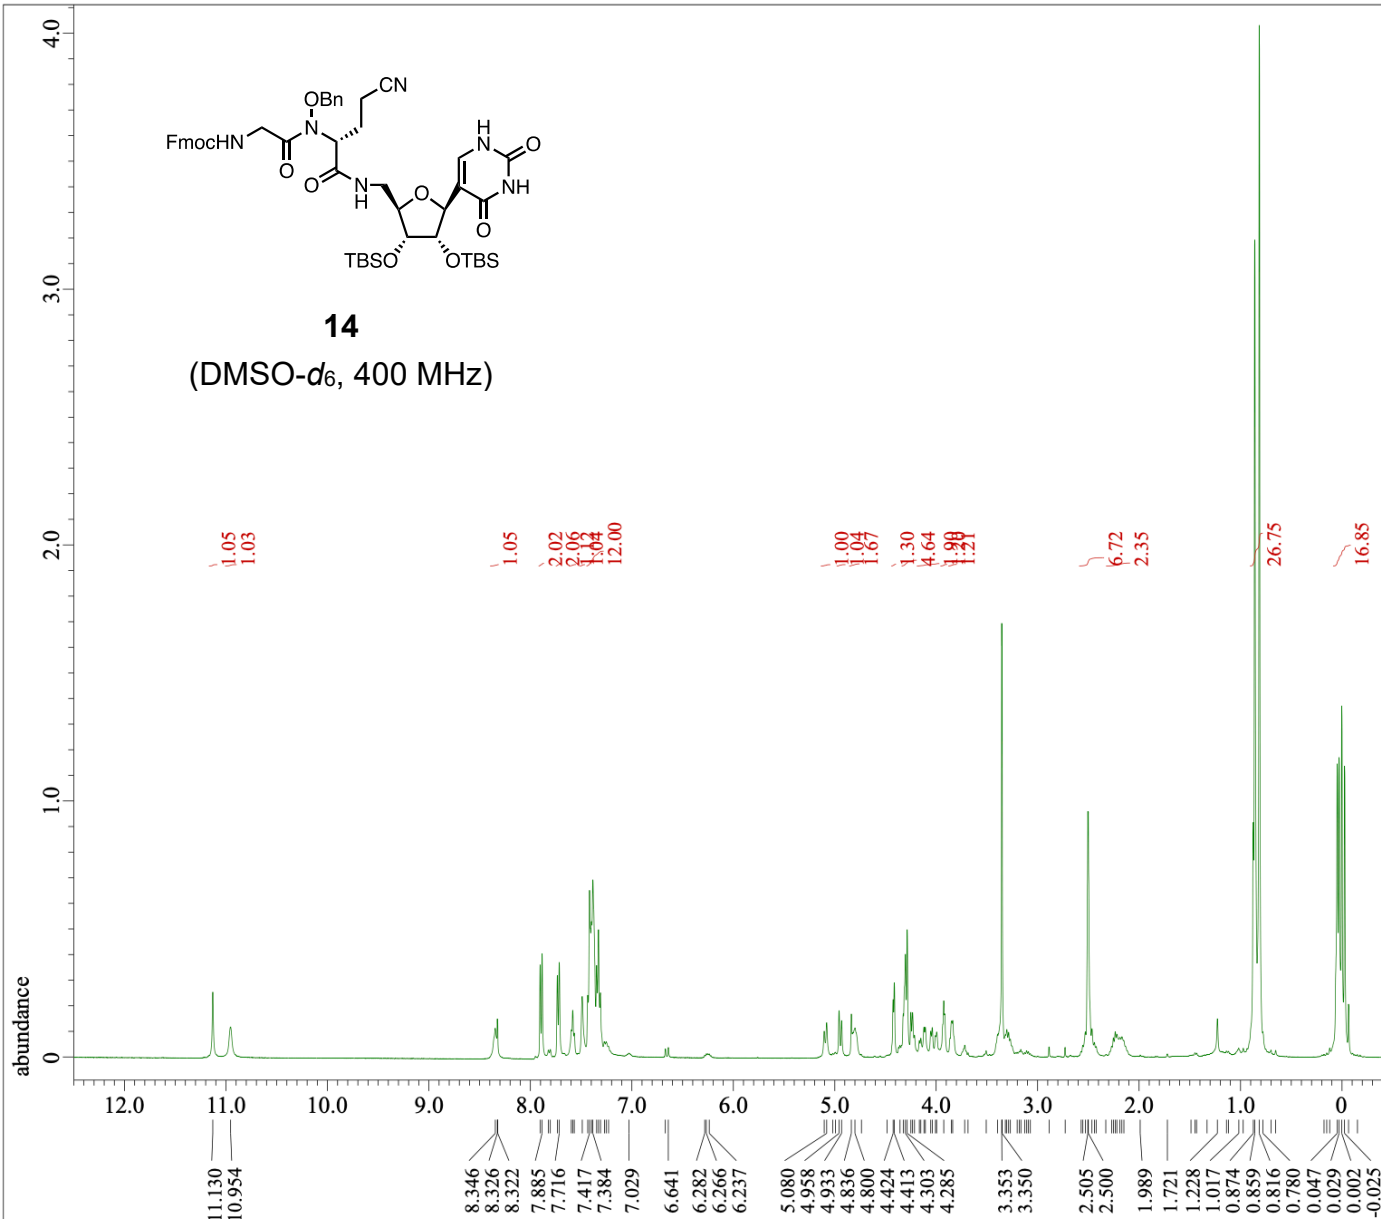

X : parts per Million : 1H

---- PROCESSING PARAMETERS ----

```
dc balance( 0, FALSE )
sexp( 0.2[Hz], 0.0[s] )
trapezoid3( 0[%], 80[%], 100[%] )
zerofill( 1, TRUE )
fft( 1, TRUE, TRUE )
machinephase
ppm
```

Derived from: 17OKW8-38-1-MP(1H\_DMSO-d6\_400MH

```
Filename      = 17OKW8-38-1-MP(1H_DMSO-d6
Author       = delta
Experiment   = single_pulse.ex2
Sample Id    = S#459008
Solvent      = DMSO-D6
Actual Start Time = 22-JAN-2022 19:47:46
Revision Time  = 3-FEB-2022 18:04:50
```

```
Comment      = 17OKW8-38-1-MP(1H_DMSO-d6
Data Format   = 1D COMPLEX
Dim Size     = 16384
X Domain     = 1H
Dim Title    = 1H
Dim Units    = [ppm]
Dimensions   = X
Site         = ECS 400
Spectrometer = JNM-ECS400
```

```
Field Strength = 9.20197068[T] (390 [MHz])
X Acq Duration = 2.78790144[s]
X Domain       = 1H
X Freq         = 391.78655441 [MHz]
X Offset       = 5 [ppm]
X Points       = 16384
X Prescans     = 1
X Resolution   = 0.35869274 [Hz]
X Sweep        = 5.87682181 [kHz]
Irr Domain     = 1H
Irr Freq       = 391.78655441 [MHz]
Irr Offset     = 5 [ppm]
Tri Domain     = 1H
Tri Freq       = 391.78655441 [MHz]
Tri Offset     = 5 [ppm]
Clipped        = FALSE
Scans          = 8
Total Scans    = 8
```

```
Relaxation Delay = 5 [s]
Recvr Gain       = 38
Temp Get         = 19.8 [dC]
X 90 Width       = 12.1 [us]
X Acq Time       = 2.78790144 [s]
X Angle          = 45 [deg]
X Atn            = 1.8 [dB]
X Pulse         = 6.05 [us]
Irr Mode         = Off
Tri Mode         = Off
Dante Presat    = FALSE
Initial Wait     = 1 [s]
Repetition Time = 7.78790144 [s]
```

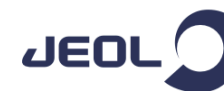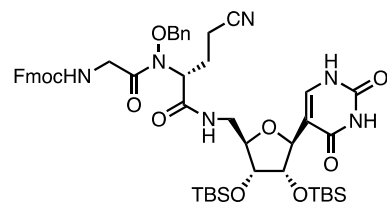

14

(DMSO-d<sub>6</sub>, 400 MHz)

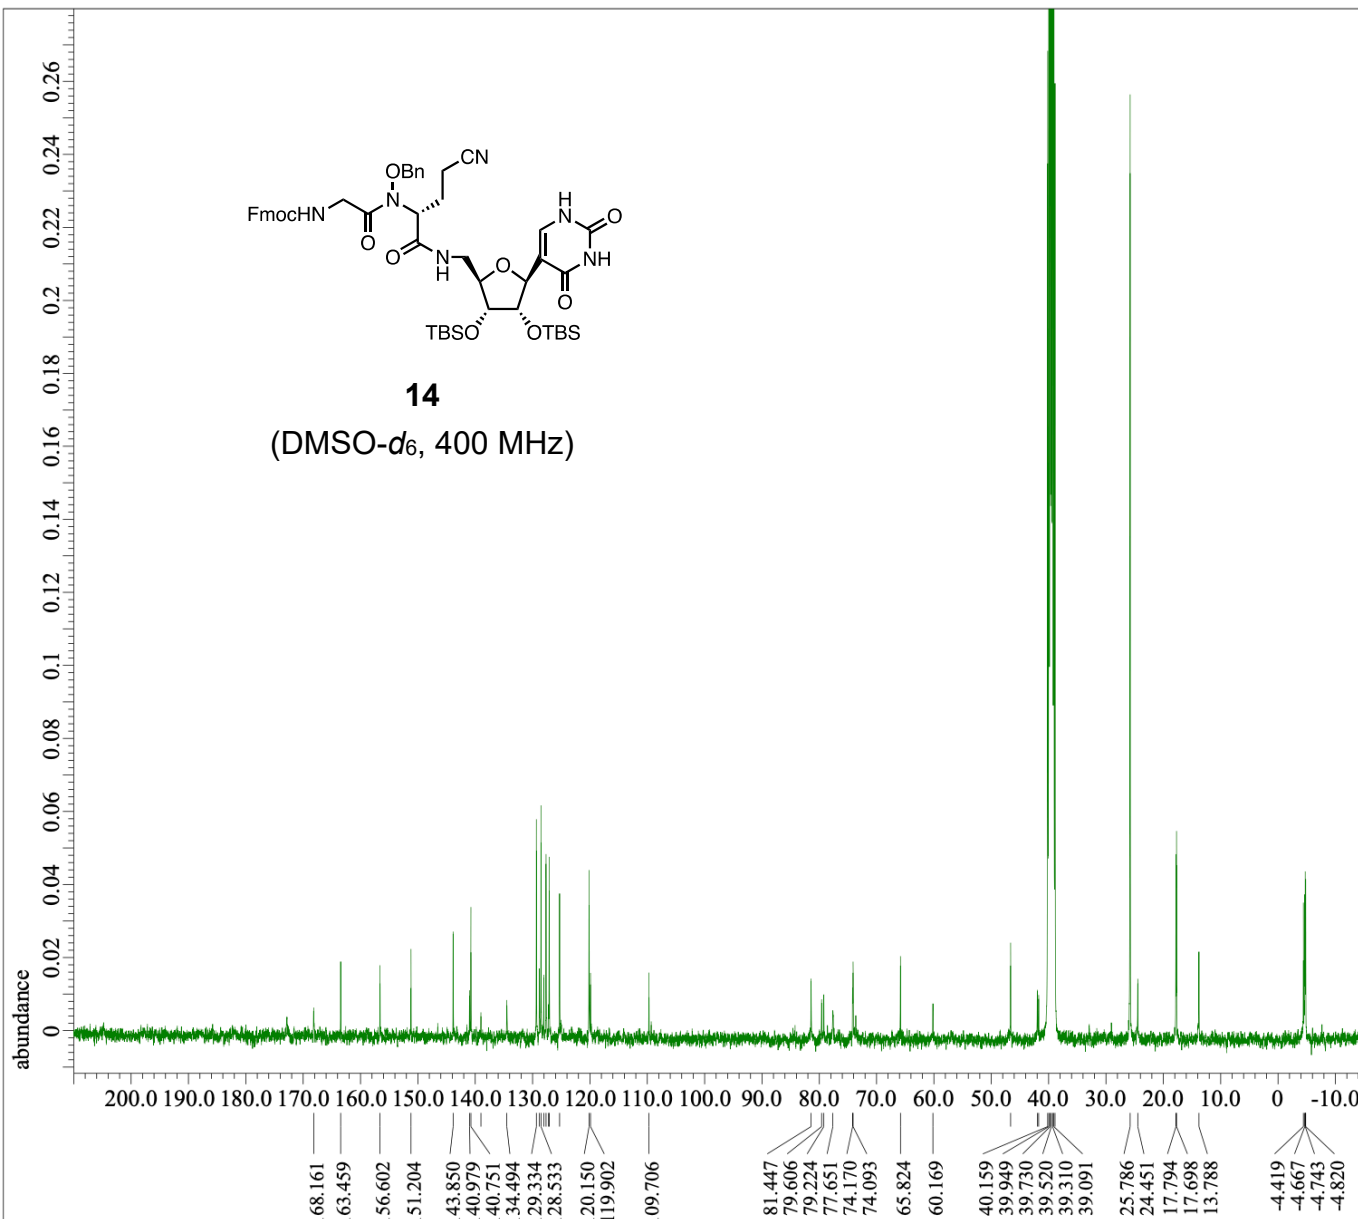

X : parts per Million : 13C

---- PROCESSING PARAMETERS ----  
dc\_balance( 0, FALSE )  
sexp( 2.0[Hz], 0.0[s] )  
trapezoid3( 0[%], 80[%], 100[%] )  
zerofill( 1, TRUE )  
fft( 1, TRUE, TRUE )  
machinephase  
ppm

Derived from: 17OKW8-38-1-MP(13C\_DMSO-d6\_400M

Filename = 17OKW8-38-1-MP(13C\_DMSO-d  
Author = delta  
Experiment = single\_pulse\_dec  
Sample\_Id = S#339028  
Solvent = DMSO-D6  
Actual\_Start\_Time = 22-JAN-2022 16:27:17  
Revision\_Time = 3-FEB-2022 18:07:23

Comment = 17OKW8-38-1-MP(13C\_DMSO-d  
Data\_Format = 1D\_COMPLEX  
Dim\_Size = 26214  
X\_Domain = 13C  
Dim\_Title = 13C  
Dim\_Units = [ppm]  
Dimensions = X  
Site = ECS 400  
Spectrometer = JNM-ECS400

Field\_Strength = 9.20197068[T] (390[MHz])  
X\_Acq\_Duration = 1.06430464[s]  
X\_Domain = 13C  
X\_Freq = 98.51479726[MHz]  
X\_Offset = 100[ppm]  
X\_Points = 32768  
X\_Prescans = 4  
X\_Resolution = 0.93958061[Hz]  
X\_Sweep = 30.78817734[kHz]  
Irr\_Domain = 1H  
Irr\_Freq = 391.78655441[MHz]  
Irr\_Offset = 5[ppm]  
Clipped = TRUE  
Scans = 3901  
Total\_Scans = 3901

Relaxation\_Delay = 2[s]  
Recvr\_Gain = 60  
Temp\_Get = 19.9[dC]  
X\_90\_Width = 9.1[us]  
X\_Acq\_Time = 1.06430464[s]  
X\_Angle = 30[deg]  
X\_Atn = 4.6[dB]  
X\_Pulse = 3.03333333[us]  
Irr\_Atn\_Dec = 21.36[dB]  
Irr\_Atn\_Noise = 21.36[dB]  
Irr\_Noise = WALTZ  
Decoupling = TRUE  
Initial\_Wait = 1[s]  
Noe = TRUE  
Noe\_Time = 2[s]  
Repetition\_Time = 3.06430464[s]

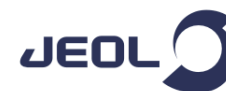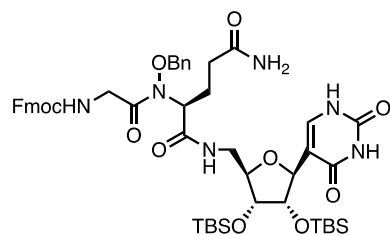

15

(DMSO-d<sub>6</sub>, 400 MHz)

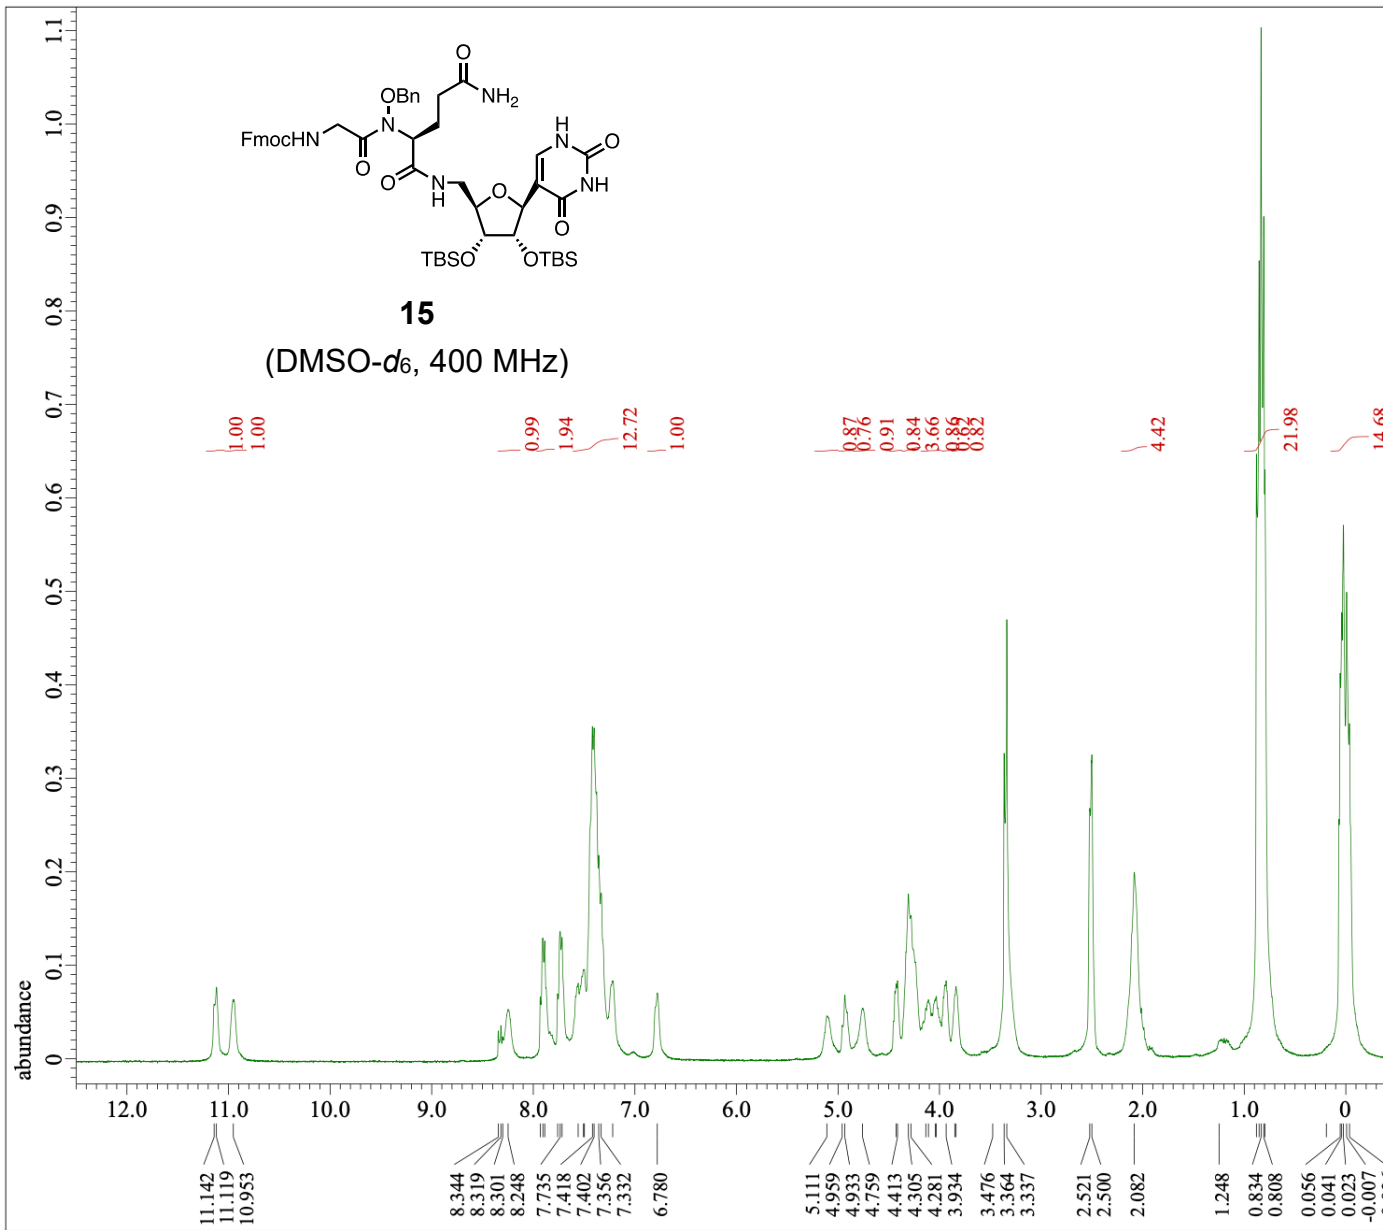

X : parts per Million : 1H

---- PROCESSING PARAMETERS ----  
dc balance ( 0, FALSE )  
sexp( 0.2[Hz], 0.0[s] )  
trapezoid3( 0[%], 80[%], 100[%] )  
zerofill( 1, TRUE )  
fft( 1, TRUE, TRUE )  
machinephase  
ppm

Derived from: 17OKW8-81-1-LP(1H DMSO-d6 400MH)

Filename = 17OKW8-81-1-LP(1H\_DMSO-d6)  
Author = delta  
Experiment = single\_pulse.ex2  
Sample\_Id = S#721915  
Solvent = DMSO-D6  
Actual\_Start\_Time = 10-FEB-2022 03:05:01  
Revision\_Time = 12-FEB-2022 12:14:06

Comment = 17OKW8-81-1-LP(1H\_DMSO-d6)  
Data\_Format = 1D COMPLEX  
Dim\_Size = 13107  
X\_Domain = 1H  
Dim\_Title = 1H  
Dim\_Units = [ppm]  
Dimensions = X  
Site = ECS 400  
Spectrometer = JNM-ECS400

Field\_Strength = 9.20197068[T] (390[MHz])  
X\_Acq\_Duration = 2.228224[s]  
X\_Domain = 1H  
X\_Freq = 391.78655441[MHz]  
X\_Offset = 5[ppm]  
X\_Points = 16384  
X\_Prescans = 1  
X\_Resolution = 0.44878791[Hz]  
X\_Sweep = 7.35294118[kHz]  
Irr\_Domain = 1H  
Irr\_Freq = 391.78655441[MHz]  
Irr\_Offset = 5[ppm]  
Tri\_Domain = 1H  
Tri\_Freq = 391.78655441[MHz]  
Tri\_Offset = 5[ppm]  
Clipped = FALSE  
Scans = 20  
Total\_Scans = 20

Relaxation\_Delay = 5[s]  
Recvr\_Gain = 40  
Temp\_Get = 20.2[dC]  
X\_90\_Width = 12.1[us]  
X\_Acq\_Time = 2.228224[s]  
X\_Angle = 45[deg]  
X\_Atn = 1.8[dB]  
X\_Pulse = 6.05[us]  
Irr\_Mode = Off  
Tri\_Mode = Off  
Dante\_Presat = FALSE  
Initial\_Wait = 1[s]  
Repetition\_Time = 7.228224[s]

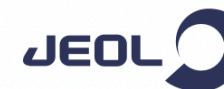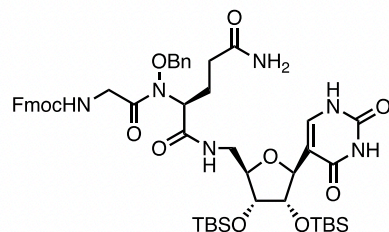

**15**  
(DMSO-*d*<sub>6</sub>, 100 MHz)

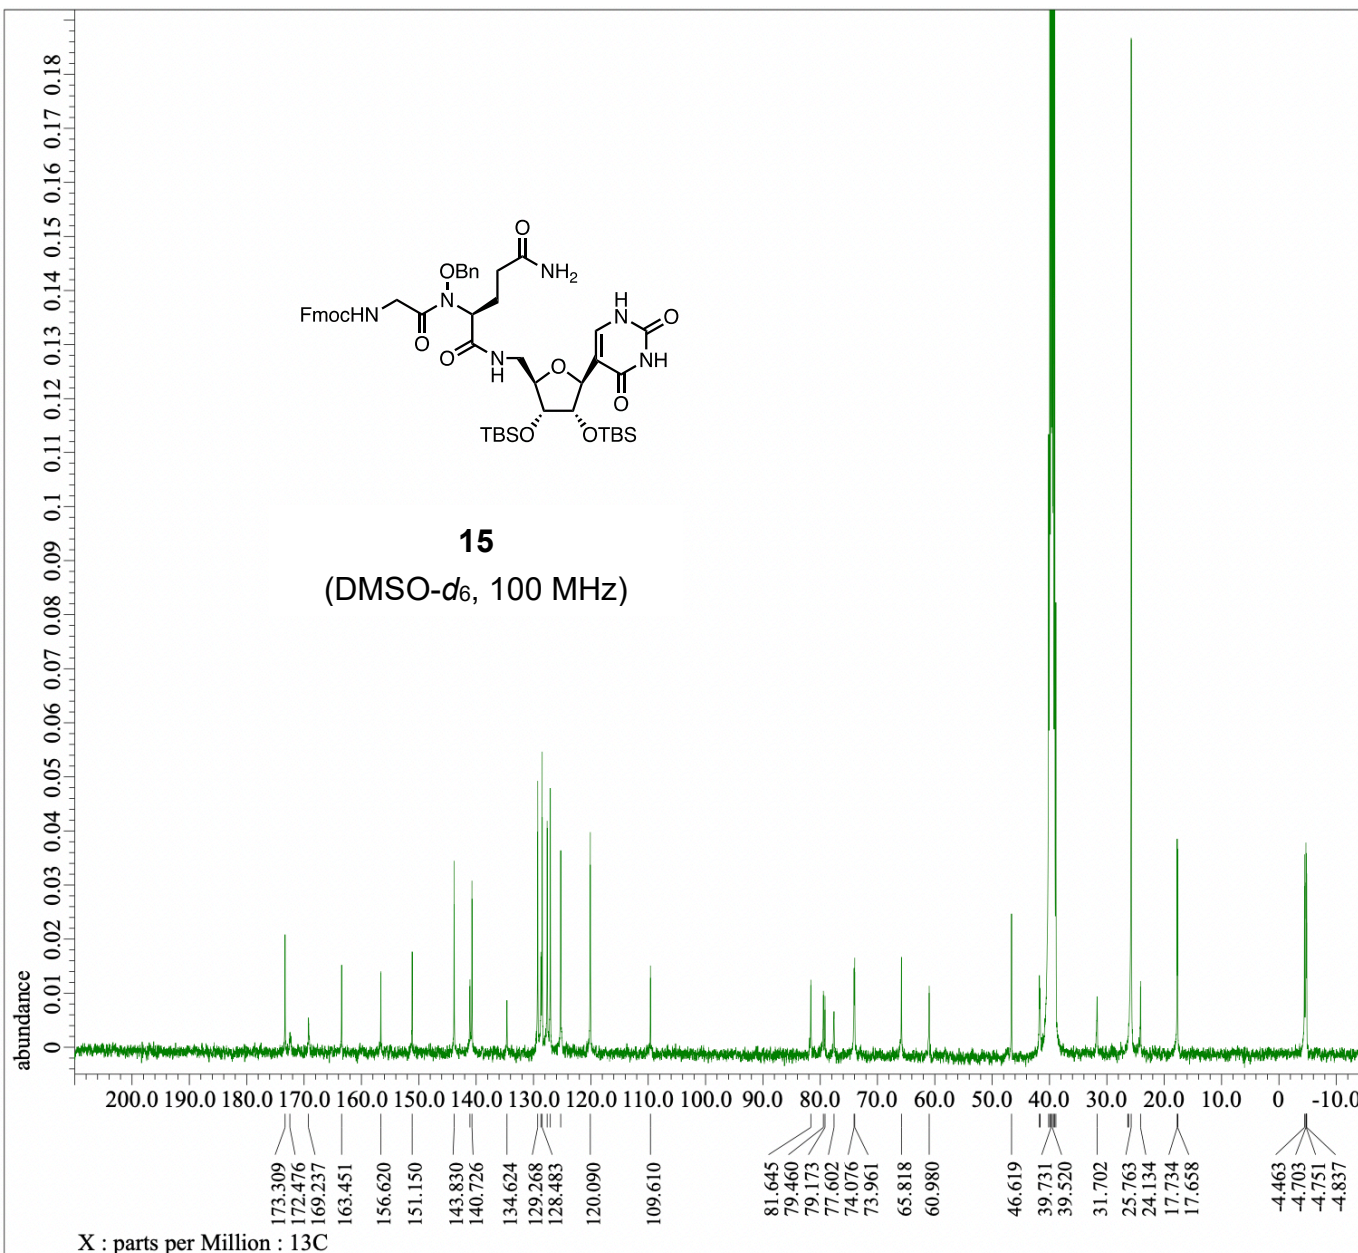

---- PROCESSING PARAMETERS ----

```
dc_balance( 0, FALSE )
sexp( 2.0[Hz], 0.0[s] )
trapezoid3( 0[%], 80[%], 100[%] )
zerofill( 1, TRUE )
fft( 1, TRUE, TRUE )
machinephase
ppm
```

Derived from: 17OKW8-81-1-LP(13C\_DMSO-d6\_400M)

```
Filename      = 17OKW8-81-1-LP(13C_DMSO-d
Author       = delta
Experiment   = single_pulse_dec
Sample_Id    = S#415513
Solvent      = DMSO-D6
Actual_Start Time = 10-FEB-2022 17:25:26
Revision_Time = 12-FEB-2022 12:53:16
```

```
Comment      = 17OKW8-81-1-LP(13C_DMSO-d
Data_Format  = 1D COMPLEX
Dim_Size     = 26214
X_Domain     = 13C
Dim_Title    = 13C
Dim_Units    = [ppm]
Dimensions   = X
Site         = ECX 400P
Spectrometer = DELTA2_NMR
```

```
Field Strength = 9.2982153[T] (400[MHz])
X_Acq_Duration = 1.048576[s]
X_Domain       = 13C
X_Freq        = 99.54517646[MHz]
X_Offset      = 100[ppm]
X_Points      = 32768
X_Prescans    = 4
X_Resolution  = 0.95367432[Hz]
X_Sweep       = 31.25[kHz]
Irr_Domain    = 1H
Irr_Freq     = 395.88430144[MHz]
Irr_Offset    = 5[ppm]
Clipped      = FALSE
Scans        = 3457
Total_Scans   = 3457
```

```
Relaxation_Delay = 2[s]
Recvr_Gain       = 54
Temp_Get        = 410.9[dC]
X_90_Width     = 10[us]
X_Acq_Time      = 1.048576[s]
X_Angle        = 30[deg]
X_Atn          = 6.6[dB]
X_Pulse        = 3.33333333[us]
Irr_Atn_Dec    = 19.15[dB]
Irr_Atn_Noise  = 19.15[dB]
Irr_Noise      = WALTZ
Decoupling     = TRUE
Initial_Wait   = 1[s]
Noe            = TRUE
Noe_Time       = 2[s]
Repetition_Time = 3.048576[s]
```

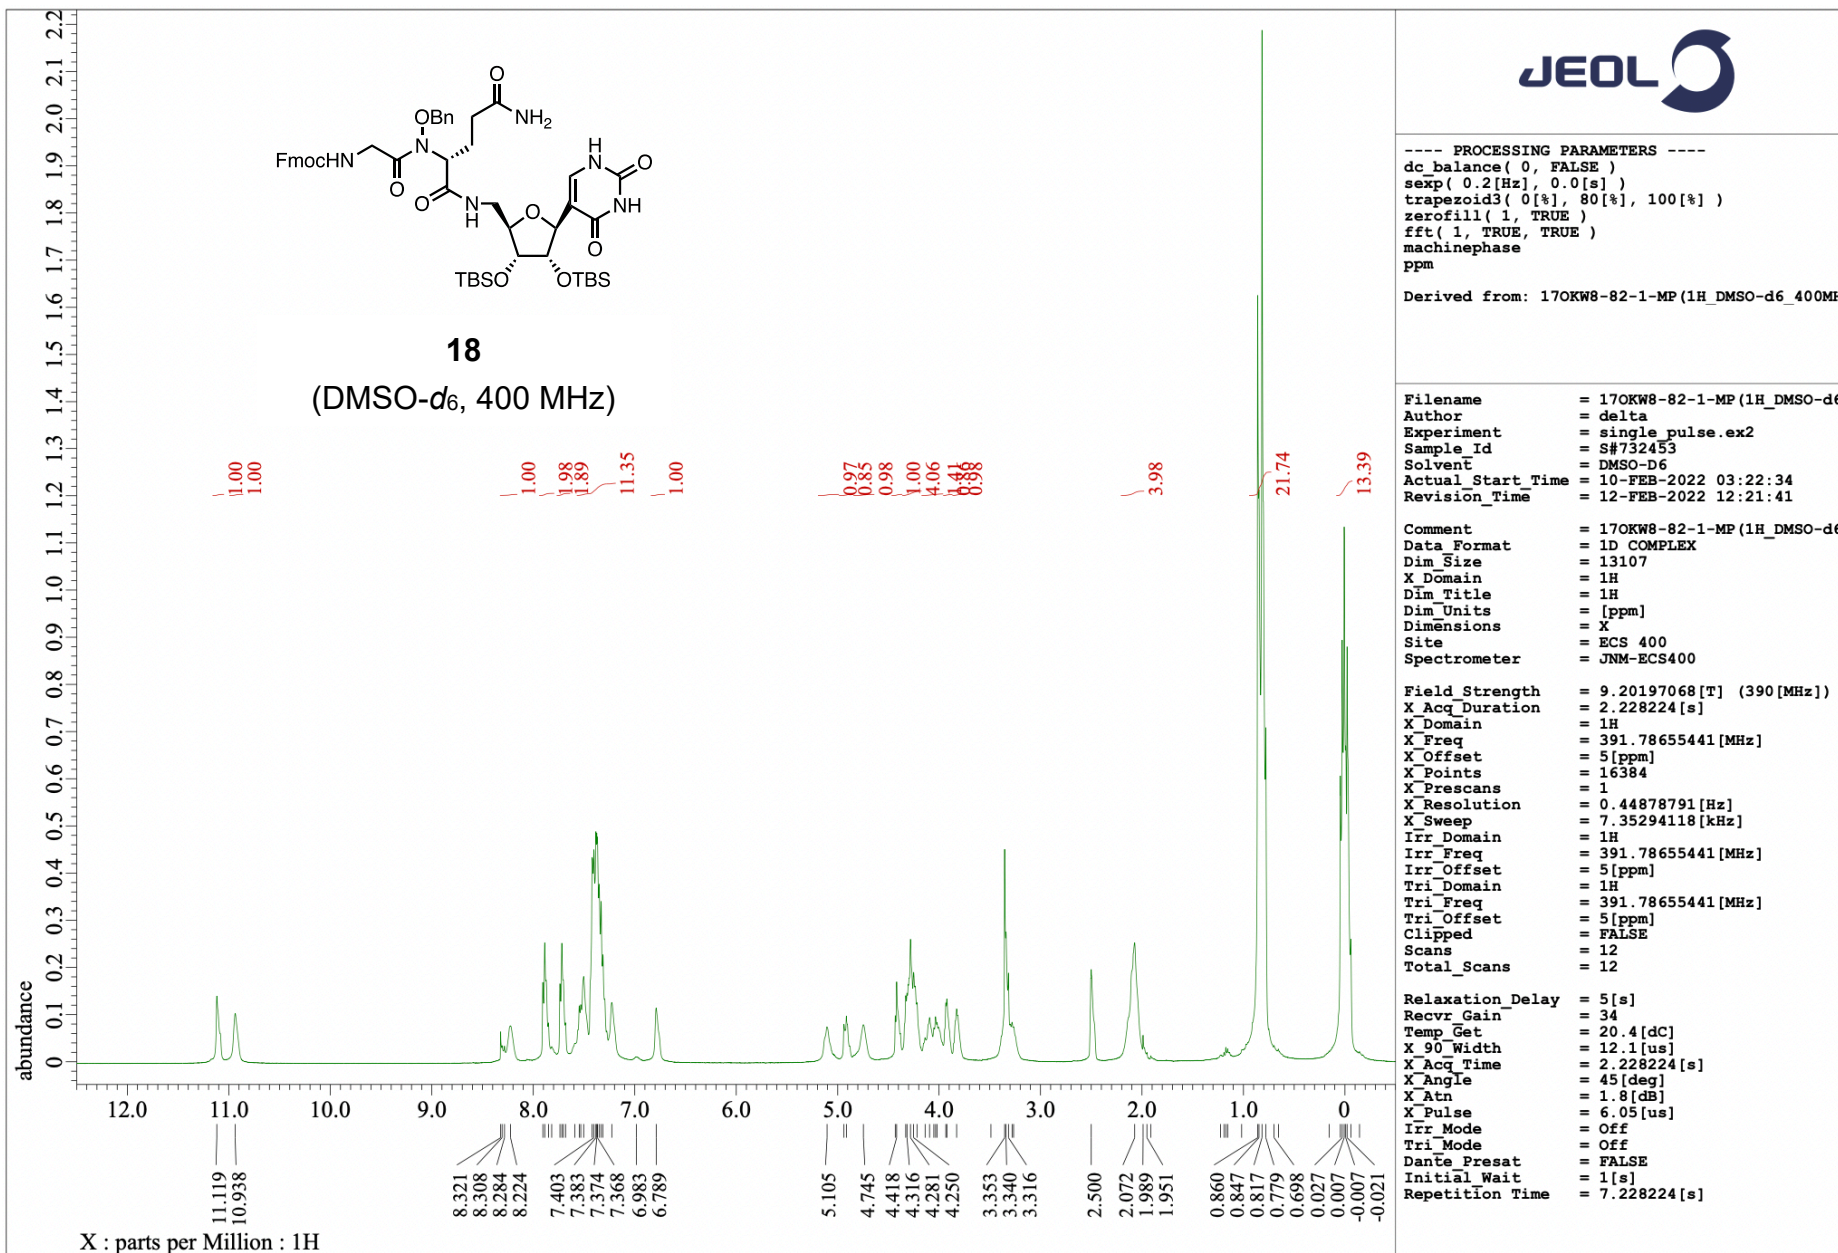













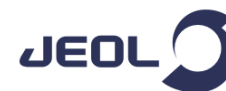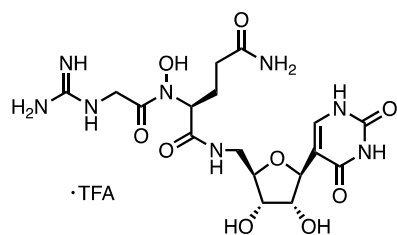

**1**  
(DMSO-*d*<sub>6</sub>, 400 MHz)

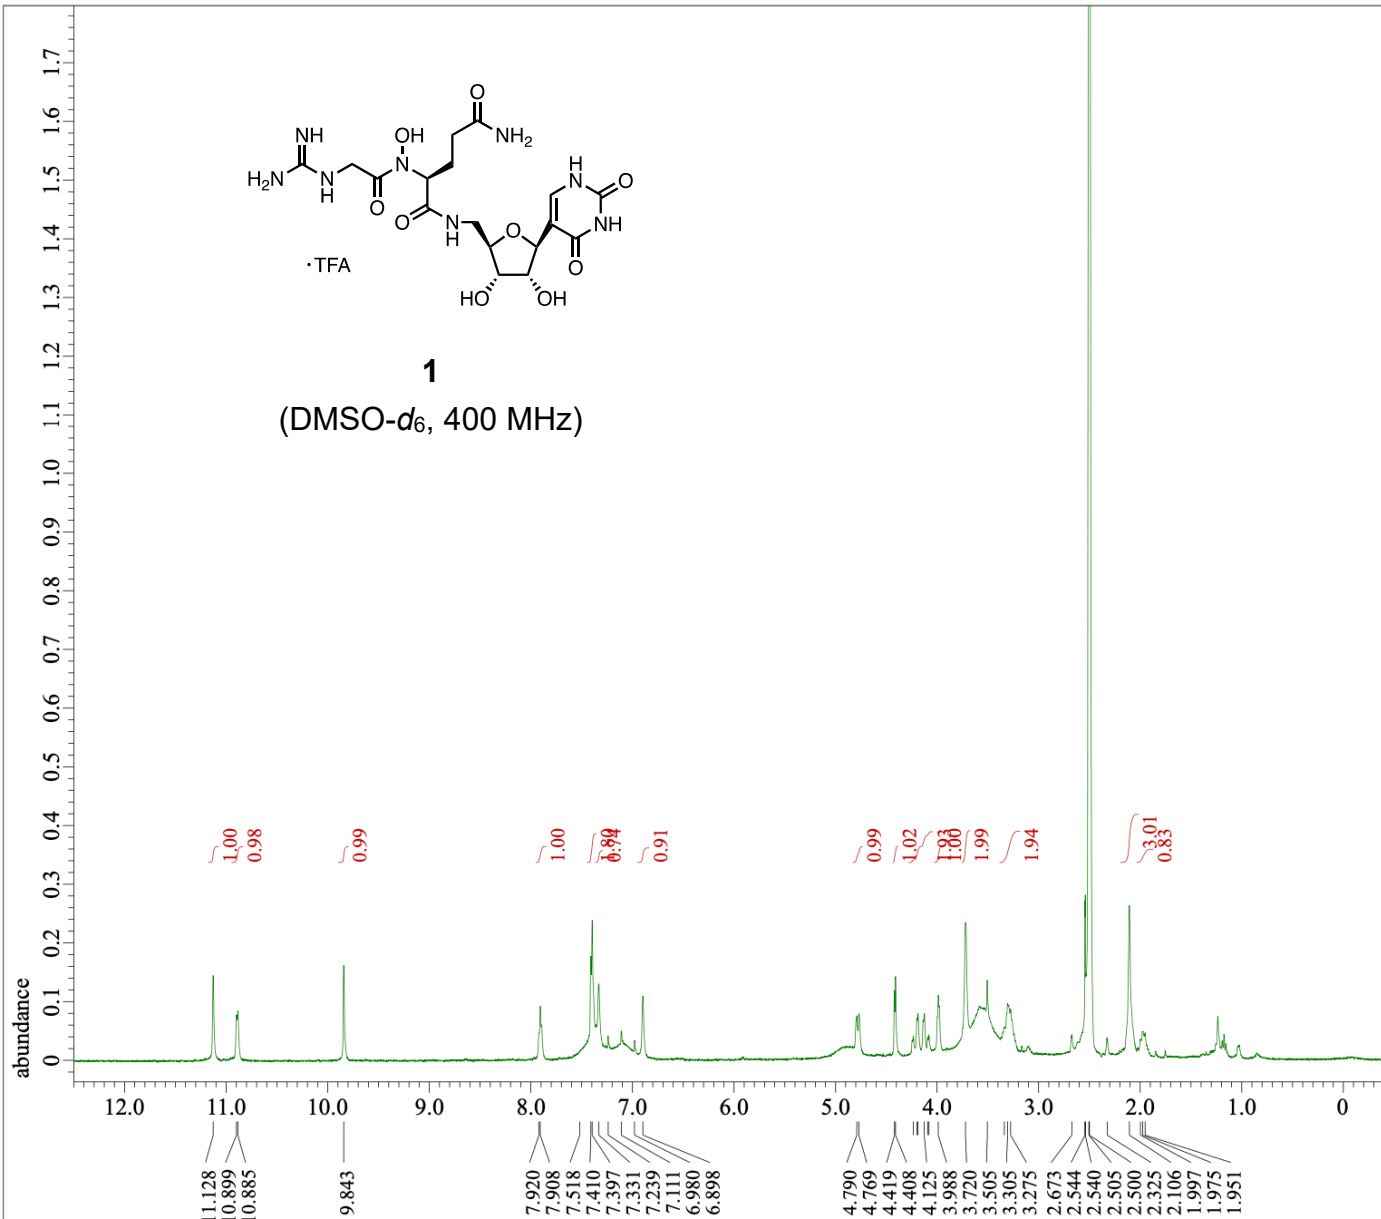

X : parts per Million : 1H

---- PROCESSING PARAMETERS ----

dc balance( 0, FALSE )  
sexp( 0.2[Hz], 0.0[s] )  
trapezoid3( 0[%], 80[%], 100[%] )  
zerofill( 1, TRUE )  
fft( 1, TRUE, TRUE )  
machinephase  
ppm

Derived from: 17OKW8-60-1-LP-TFAsalt(1H\_DMSO-

Filename = 17OKW8-60-1-LP-TFAsalt(1H  
Author = delta  
Experiment = single\_pulse.ex2  
Sample\_Id = S#580581  
Solvent = DMSO-D6  
Actual\_Start\_Time = 29-JAN-2022 23:09:59  
Revision\_Time = 7-FEB-2022 11:59:37

Comment = 17OKW8-60-1-LP-TFAsalt(1H  
Data\_Format = 1D COMPLEX  
Dim\_Size = 13107  
X\_Domain = 1H  
Dim\_Title = 1H  
Dim\_Units = [ppm]  
Dimensions = X  
Site = ECS 400  
Spectrometer = JNM-ECS400

Field\_Strength = 9.20197068[T] (390[MHz])  
X\_Acq\_Duration = 2.228224[s]  
X\_Domain = 1H  
X\_Freq = 391.78655441[MHz]  
X\_Offset = 5[ppm]  
X\_Points = 16384  
X\_Prescans = 1  
X\_Resolution = 0.44878791[Hz]  
X\_Sweep = 7.35294118[kHz]  
Irr\_Domain = 1H  
Irr\_Freq = 391.78655441[MHz]  
Irr\_Offset = 5[ppm]  
Tri\_Domain = 1H  
Tri\_Freq = 391.78655441[MHz]  
Tri\_Offset = 5[ppm]  
Clipped = FALSE  
Scans = 27  
Total\_Scans = 27

Relaxation\_Delay = 5[s]  
Recvr\_Gain = 48  
Temp\_Get = 20.4[dc]  
X\_90\_Width = 12.1[us]  
X\_Acq\_Time = 2.228224[s]  
X\_Angle = 45[deg]  
X\_Atn = 1.8[dB]  
X\_Pulse = 6.05[us]  
Irr\_Mode = Off  
Tri\_Mode = Off  
Dante\_Preset = FALSE  
Initial\_Wait = 1[s]  
Repetition\_Time = 7.228224[s]

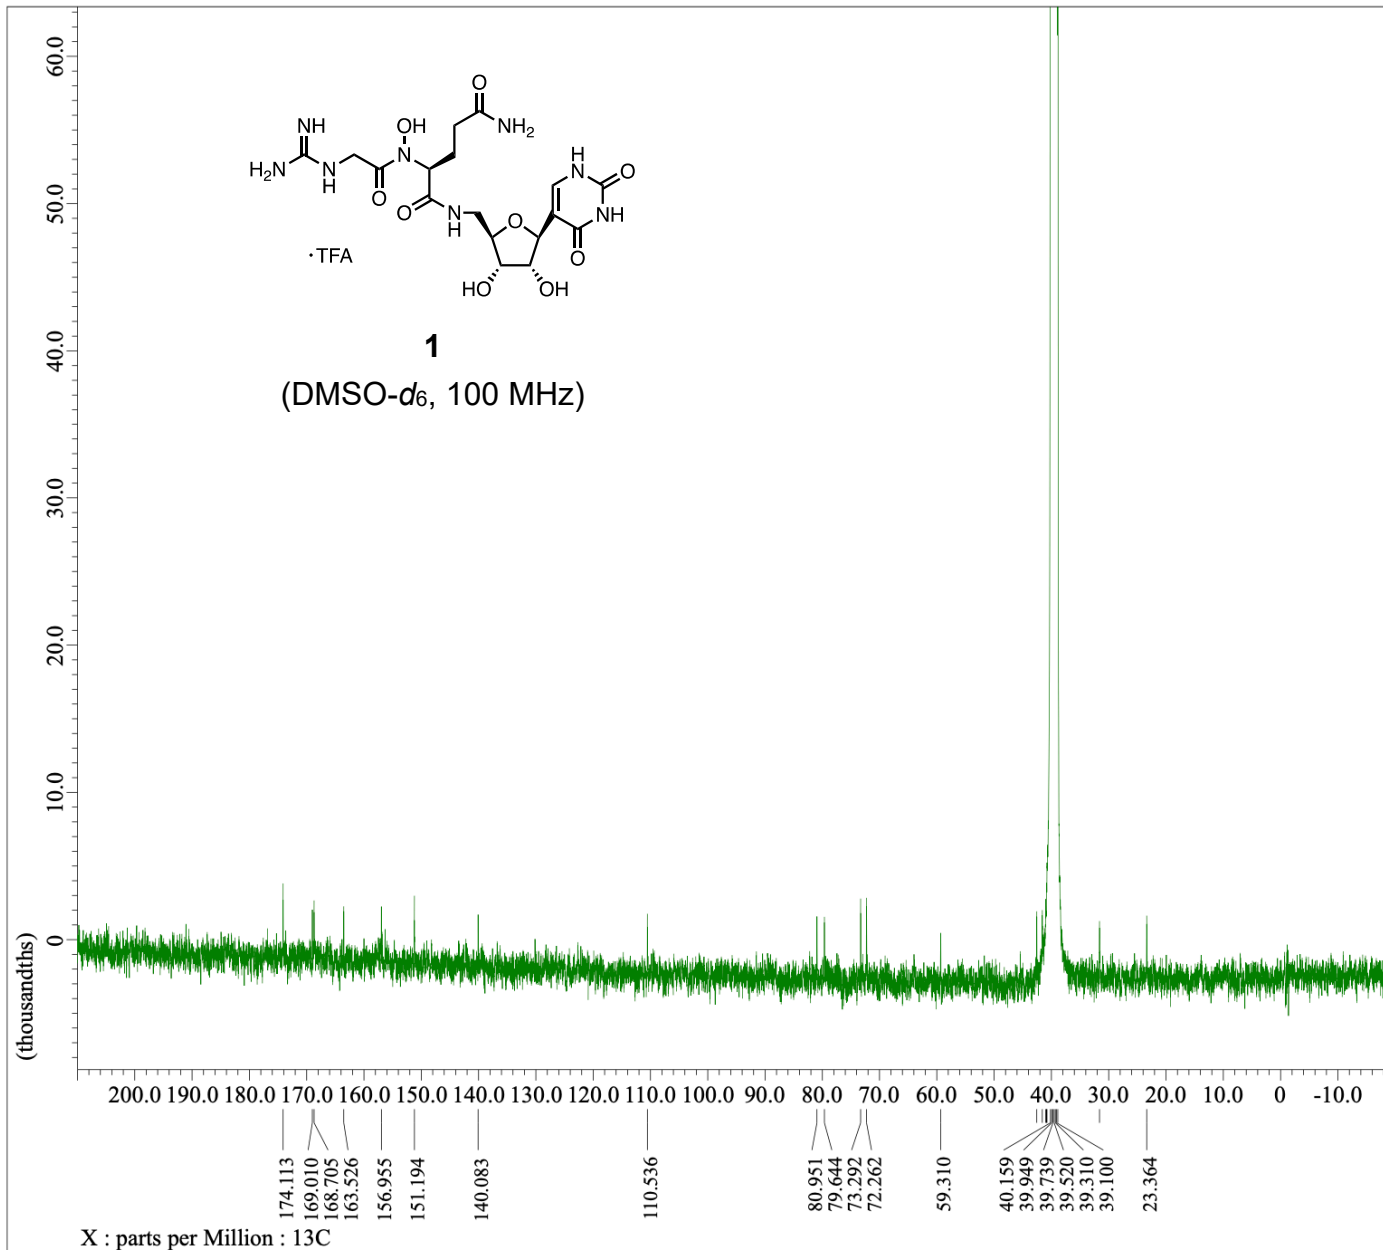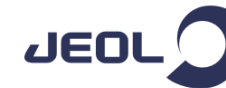

---- PROCESSING PARAMETERS ----

```
dc_balance( 0, FALSE )
sexp( 2.0[Hz], 0.0[s] )
trapezoid3( 0[%], 80[%], 100[%] )
zerofill( 1, TRUE )
fft( 1, TRUE, TRUE )
machinephase
ppm
```

Derived from: 17OKW8-60-1-LP-TFAsalt(13C\_DMSO)

```
Filename      = 17OKW8-60-1-LP-TFAsalt(13
Author        = delta
Experiment    = single_pulse_dec
Sample_Id     = S#822807
Solvent       = DMSO-D6
Actual_Start Time = 2-FEB-2022 05:53:42
Revision_Time = 7-FEB-2022 11:52:27
```

```
Comment      = 17OKW8-60-1-LP-TFAsalt(13
Data_Format   = 1D COMPLEX
Dim_Size      = 26214
X_Domain      = 13C
Dim_Title     = 13C
Dim_Units     = [ppm]
Dimensions    = X
Site          = ECS 400
Spectrometer  = JNM-ECS400
```

```
Field Strength = 9.20197068[T] (390[MHz])
X_Acq_Duration = 1.06430464[s]
X_Domain       = 13C
X_Freq         = 98.51479726[MHz]
X_Offset       = 100[ppm]
X_Points       = 32768
X_Prescans     = 4
X_Resolution   = 0.93958061[Hz]
X_Sweep        = 30.78817734[kHz]
Irr_Domain     = 1H
Irr_Freq       = 391.78655441[MHz]
Irr_Offset     = 5[ppm]
Clipped        = TRUE
Scans          = 11147
Total_Scans    = 11147
```

```
Relaxation_Delay = 2[s]
Recvr_Gain       = 60
Temp_Get         = 19.5[dC]
X_90_Width      = 9.1[us]
X_Acq_Time      = 1.06430464[s]
X_Angle         = 30[deg]
X_Atn           = 4.6[dB]
X_Pulse         = 3.03333333[us]
Irr_Atn_Dec     = 21.36[dB]
Irr_Atn_Noise   = 21.36[dB]
Irr_Noise       = WAITZ
Decoupling      = TRUE
Initial_Wait    = 1[s]
Noe              = TRUE
Noe_Time        = 2[s]
Repetition_Time = 3.06430464[s]
```

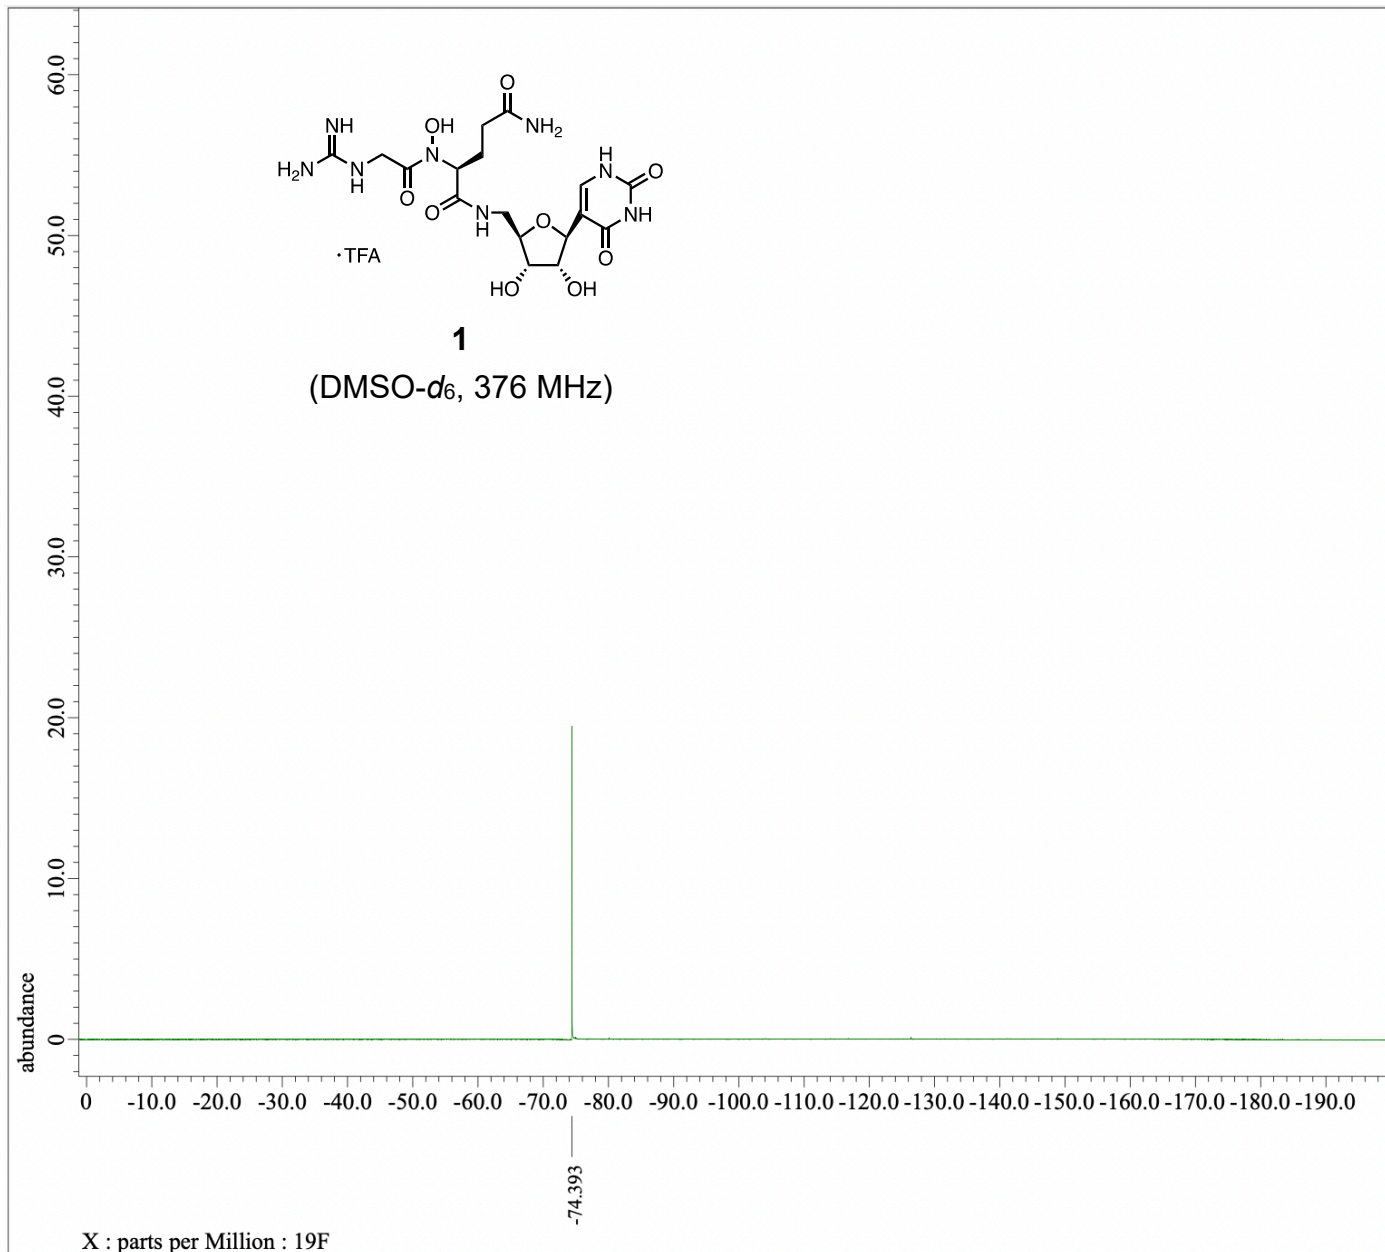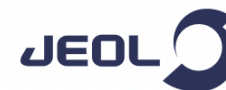

```

---- PROCESSING PARAMETERS ----
dc balance( 0, FALSE )
sexp( 0.2[Hz], 0.0[s] )
trapezoid3( 0[%], 80[%], 100[%] )
zerofill( 1, TRUE )
fft( 1, TRUE, TRUE )
machinephase
ppm
phase( -5, 0, 50[%] )

```

Derived from: 17OKW8-60-1-LP-TFAsalt-4(19F\_DM

```

Filename      = 17OKW8-60-1-LP-TFAsalt-4 (
Author       = delta
Experiment   = single_pulse.ex2
Sample_Id    = S#757858
Solvent      = DMSO-D6
Actual_Start Time = 8-FEB-2022 04:05:45
Revision_Time = 7-FEB-2022 22:22:42

```

```

Comment      = 17OKW8-60-1-LP-TFAsalt-4 (
Data Format   = 1D COMPLEX
Dim Size     = 13107
X_Domain     = 19F
Dim Title    = 19F
Dim Units    = [ppm]
Dimensions   = X
Site         = ECS 400
Spectrometer = JNM-ECS400

```

```

Field Strength = 9.20197068[T] (390[MHz])
X_Acq_Duration = 0.17563648[s]
X_Domain       = 19F
X_Freq         = 368.64763285[MHz]
X_Offset       = -100.0[ppm]
X_Points       = 16384
X_Prescans     = 1
X_Resolution  = 5.69357801[Hz]
X_Sweep        = 93.28358209[kHz]
Irr_Domain     = 19F
Irr_Freq       = 368.64763285[MHz]
Irr_Offset     = 5[ppm]
Tri_Domain     = 19F
Tri_Freq       = 368.64763285[MHz]
Tri_Offset     = 5[ppm]
Clipped        = FALSE
Scans          = 4
Total_Scans    = 4

```

```

Relaxation_Delay = 5[s]
Recvr_Gain       = 50
Temp_Get         = 20.6[dc]
X_90_Width       = 12.5[us]
X_Acq_Time       = 0.17563648[s]
X_Angle          = 45[deg]
X_Atn            = 2.2[db]
X_Pulse          = 6.25[us]
Irr_Mode         = Off
Tri_Mode         = Off
Dante_Presat    = FALSE
Initial_Wait     = 1[s]
Repetition_Time  = 5.17563648[s]

```



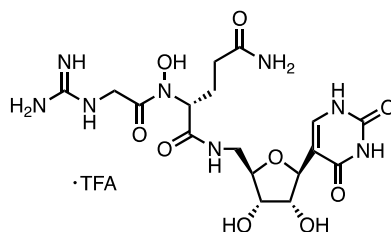

**epi-1**  
(DMSO-d<sub>6</sub>, 400 MHz)

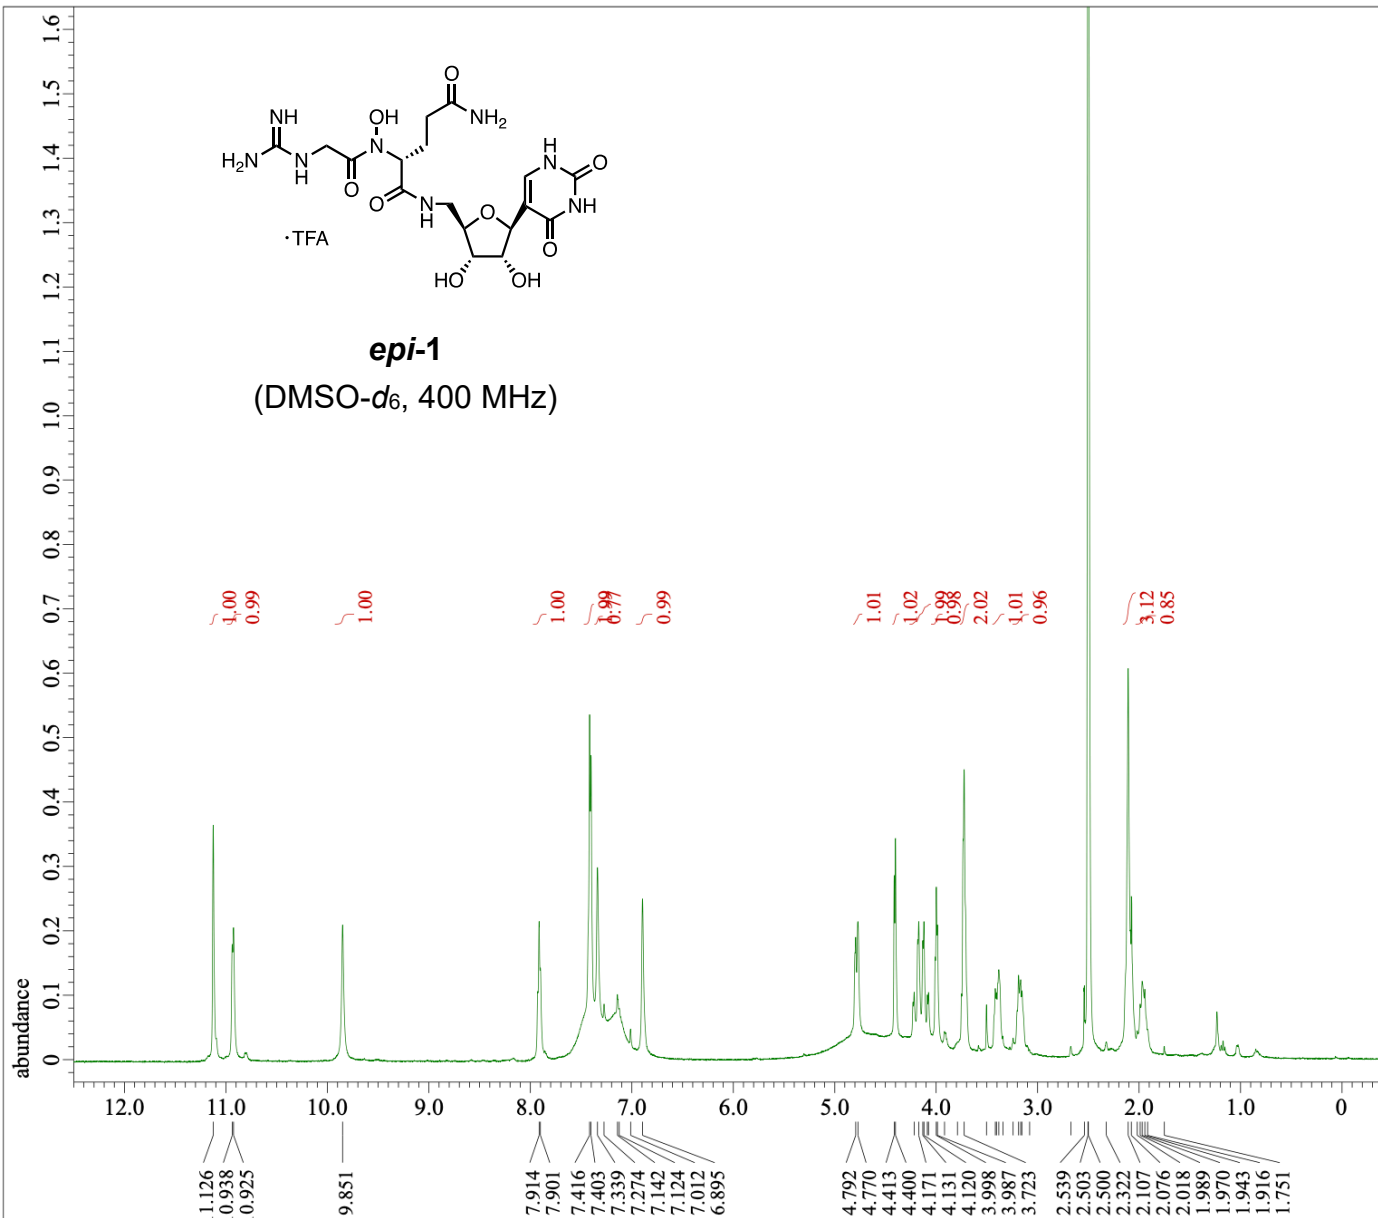

X : parts per Million : 1H

---- PROCESSING PARAMETERS ----

```
dc balance( 0, FALSE )
sexp( 0.2[Hz], 0.0[s] )
trapezoid3( 0[%], 80[%], 100[%] )
zerofill( 1, TRUE )
fft( 1, TRUE, TRUE )
machinephase
ppm
```

Derived from: 17OKW8-65-1-MP-TFAsalt(1H\_DMSO-

```
Filename      = 17OKW8-65-1-MP-TFAsalt(1H
Author       = delta
Experiment   = single_pulse.ex2
Sample_Id    = S#794618
Solvent      = DMSO-D6
Actual_Start Time = 5-FEB-2022 05:06:29
Revision_Time = 7-FEB-2022 22:30:42
```

```
Comment      = 17OKW8-65-1-MP-TFAsalt(1H
Data_Format  = 1D COMPLEX
Dim_Size     = 13107
X_Domain     = 1H
Dim_Title    = 1H
Dim_Units    = [ppm]
Dimensions   = X
Site         = ECS 400
Spectrometer = JNM-ECS400
```

```
Field Strength = 9.20197068[T] (390[MHz])
X_Acq_Duration = 2.228224[s]
X_Domain       = 1H
X_Freq         = 391.78655441[MHz]
X_Offset       = 5[ppm]
X_Points       = 16384
X_Prescans     = 1
X_Resolution   = 0.44878791[Hz]
X_Sweep        = 7.35294118[kHz]
Irr_Domain     = 1H
Irr_Freq       = 391.78655441[MHz]
Irr_Offset     = 5[ppm]
Tri_Domain     = 1H
Tri_Freq       = 391.78655441[MHz]
Tri_Offset     = 5[ppm]
Clipped        = FALSE
Scans          = 28
Total_Scans    = 28
```

```
Relaxation_Delay = 5[s]
Recvr_Gain        = 42
Temp_Get         = 20.7[dC]
X_90_Width       = 12.1[us]
X_Acq_Time       = 2.228224[s]
X_Angle          = 45[deg]
X_Atn            = 1.8[dB]
X_Pulse          = 6.05[us]
Irr_Mode         = Off
Tri_Mode         = Off
Dante_Preset     = FALSE
Initial_Wait     = 1[s]
Repetition_Time  = 7.228224[s]
```

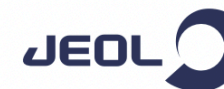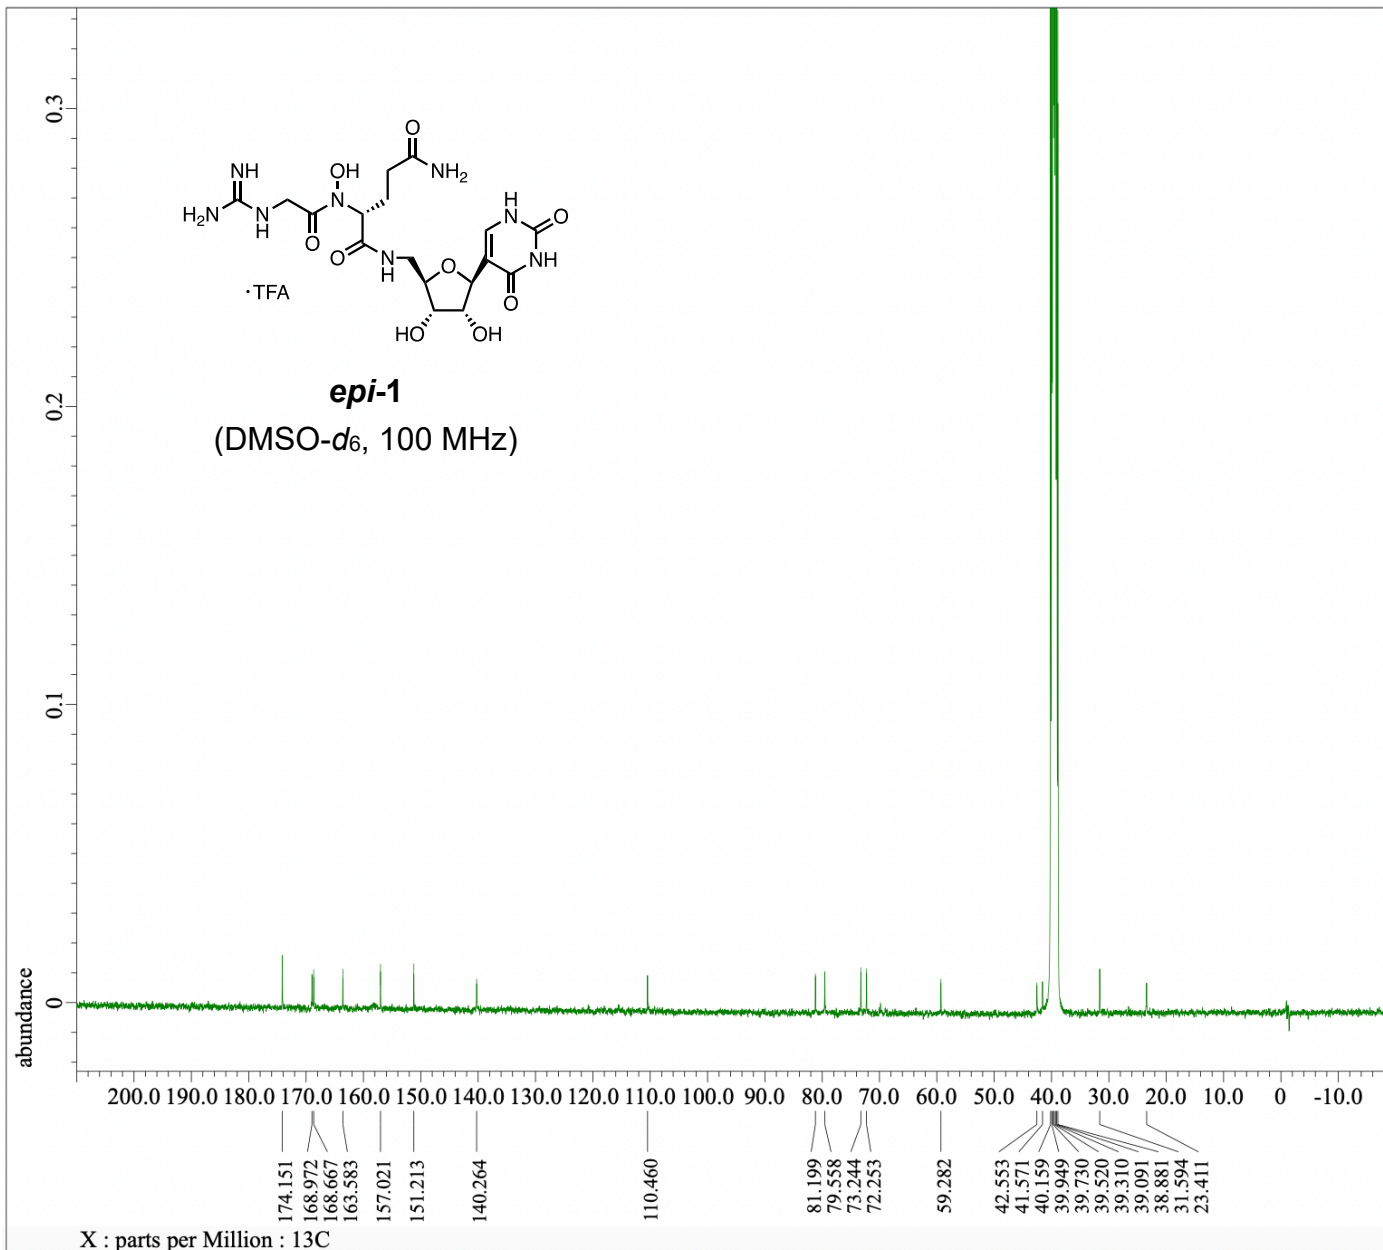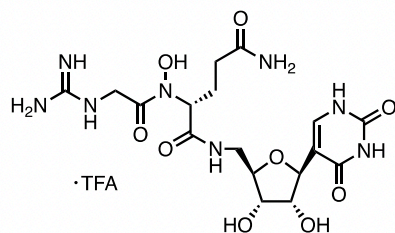

**epi-1**  
(DMSO-*d*<sub>6</sub>, 100 MHz)

---- PROCESSING PARAMETERS ----

```
dc_balance( 0, FALSE )
sexp( 2.0[Hz], 0.0[s] )
trapezoid3( 0[%], 80[%], 100[%] )
zerofill( 1, TRUE )
fft( 1, TRUE, TRUE )
machinephase
ppm
```

Derived from: 17OKW8-65-1-MP-TFAsalt-2(13C\_DM

```
Filename      = 17OKW8-65-1-MP-TFAsalt-2 (
Author        = delta
Experiment    = single_pulse_dec
Sample_Id     = S#803252
Solvent       = DMSO-D6
Actual_Start Time = 10-FEB-2022 05:20:06
Revision_Time = 12-FEB-2022 12:25:04
```

```
Comment      = 17OKW8-65-1-MP-TFAsalt-2 (
Data_Format  = 1D COMPLEX
Dim_Size     = 26214
X_Domain     = 13C
Dim_Title    = 13C
Dim_Units    = [ppm]
Dimensions   = X
Site         = ECS 400
Spectrometer = JNM-ECS400
```

```
Field Strength = 9.20197068[T] (390[MHz])
X_Acq_Duration = 1.06430464[s]
X_Domain       = 13C
X_Freq        = 98.51479726[MHz]
X_Offset      = 100[ppm]
X_Points      = 32768
X_Prescans    = 4
X_Resolution  = 0.93958061[Hz]
X_Sweep       = 30.78817734[kHz]
Irr_Domain    = 1H
Irr_Freq      = 391.78655441[MHz]
Irr_Offset    = 5[ppm]
Clipped       = TRUE
Scans         = 12439
Total_Scans   = 12439
```

```
Relaxation Delay = 2[s]
Recvr Gain       = 60
Temp_Get         = 19.8[dC]
X_90_Width      = 9.1[us]
X_Acq_Time      = 1.06430464[s]
X_Angle         = 30[deg]
X_Atn           = 4.6[dB]
X_Pulse         = 3.03333333[us]
Irr_Atn_Dec     = 21.36[dB]
Irr_Atn_Noise  = 21.36[dB]
Irr_Noise       = WAITZ
Decoupling      = TRUE
Initial_Wait    = 1[s]
Noe              = TRUE
Noe_Time        = 2[s]
Repetition Time = 3.06430464[s]
```

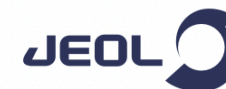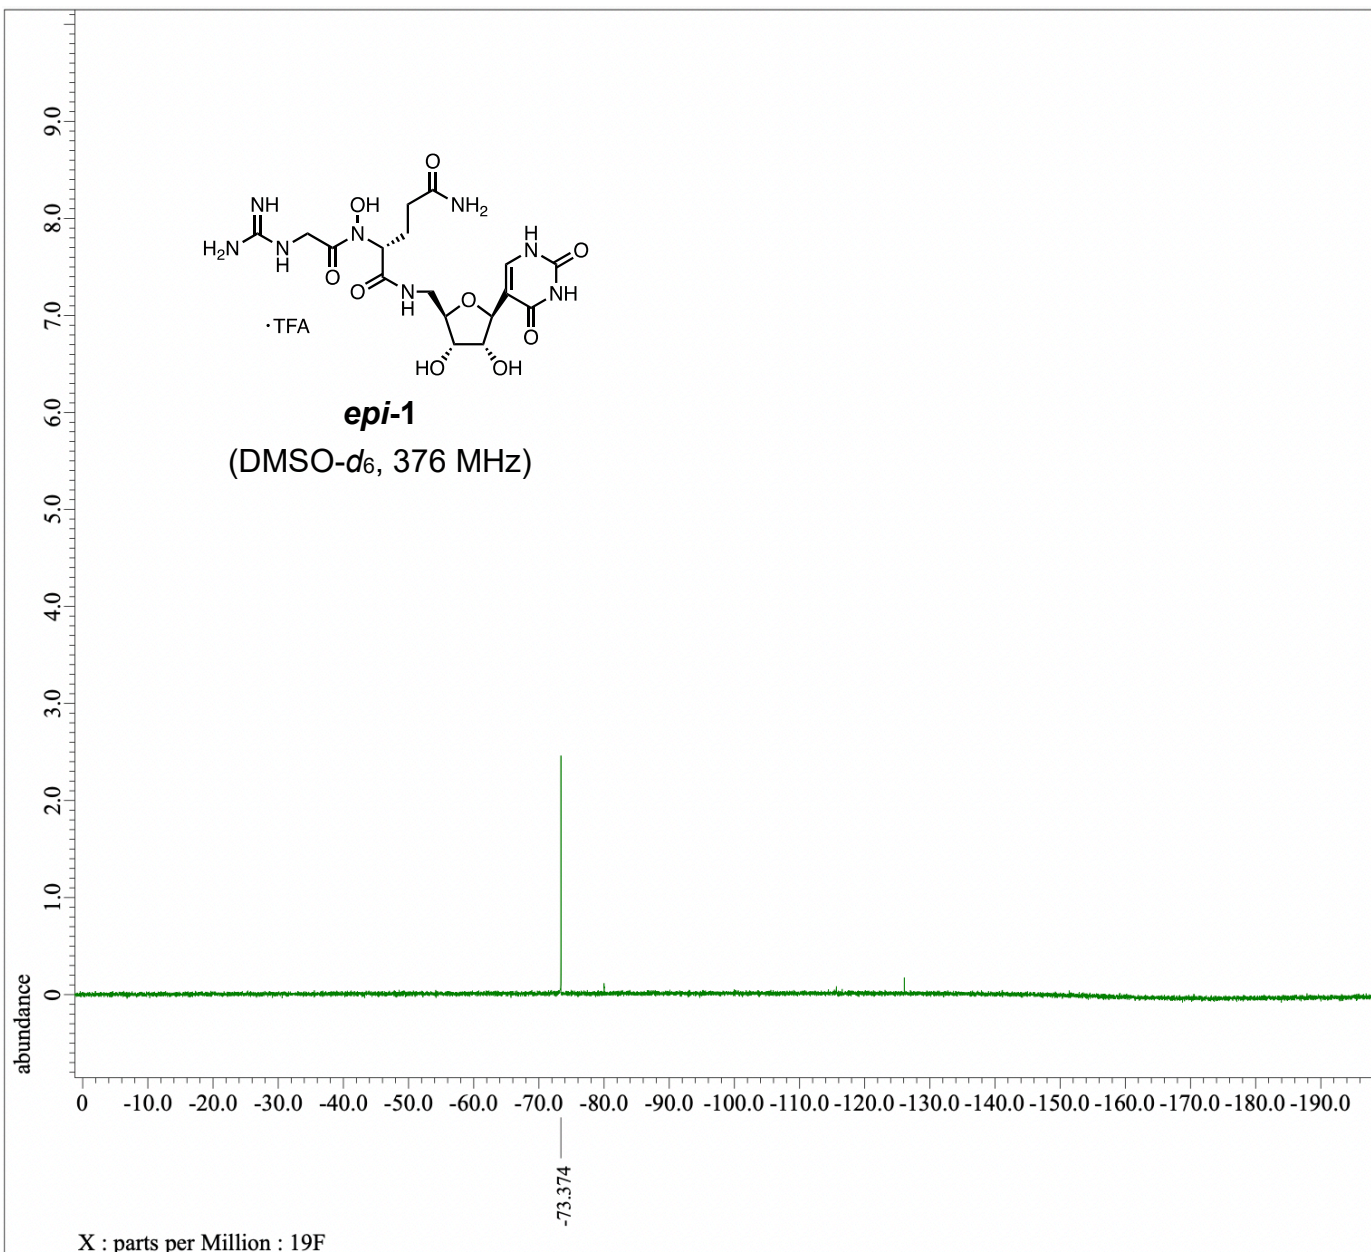

---- PROCESSING PARAMETERS ----

```
dc balance( 0, FALSE )
sexp( 0.2[Hz], 0.0[s] )
trapezoid3( 0[%], 80[%], 100[%] )
zerofill( 1, TRUE )
fft( 1, TRUE, TRUE )
machinephase
ppm
phase( -85, 0, 50[%] )
```

Derived from: 17OKW8-65-1-MP-TFAsalt-4 (19F\_DM

```
Filename      = 17OKW8-65-1-MP-TFAsalt-4 (
Author       = delta
Experiment   = single_pulse.ex2
Sample_Id    = S#786949
Solvent      = DMSO-D6
Actual_Start_Time = 8-FEB-2022 04:54:13
Revision_Time  = 7-FEB-2022 22:21:57

Comment      = 17OKW8-65-1-MP-TFAsalt-4 (
Data_Format  = 1D COMPLEX
Dim_Size     = 13107
X_Domain     = 19F
Dim_Title    = 19F
Dim_Units    = [ppm]
Dimensions   = X
Site         = ECS 400
Spectrometer = JNM-ECS400

Field_Strength = 9.20197068[T] (390 [MHz])
X_Acq_Duration = 0.17563648[s]
X_Domain       = 19F
X_Freq        = 368.64763285 [MHz]
X_Offset      = -100.0 [ppm]
X_Points      = 16384
X_Prescans    = 1
X_Resolution  = 5.69357801 [Hz]
X_Sweep       = 93.28358209 [kHz]
Irr_Domain    = 19F
Irr_Freq     = 368.64763285 [MHz]
Irr_Offset   = 5 [ppm]
Tri_Domain   = 19F
Tri_Freq     = 368.64763285 [MHz]
Tri_Offset   = 5 [ppm]
Clipped      = FALSE
Scans        = 4
Total_Scans  = 4

Relaxation_Delay = 5 [s]
Recvr Gain       = 50
Temp_Get        = 20.8 [dC]
X_90_Width      = 12.5 [us]
X_Acq_Time      = 0.17563648 [s]
X_Angle         = 45 [deg]
X_Atn          = 2.2 [dB]
X_Pulse        = 6.25 [us]
Irr_Mode       = Off
Tri_Mode       = Off
Dante_Presat   = FALSE
Initial_Wait   = 1 [s]
Repetition_Time = 5.17563648 [s]
```

### 3) Reaction mechanism of Ugi multicomponent reaction

#### Ugi reaction

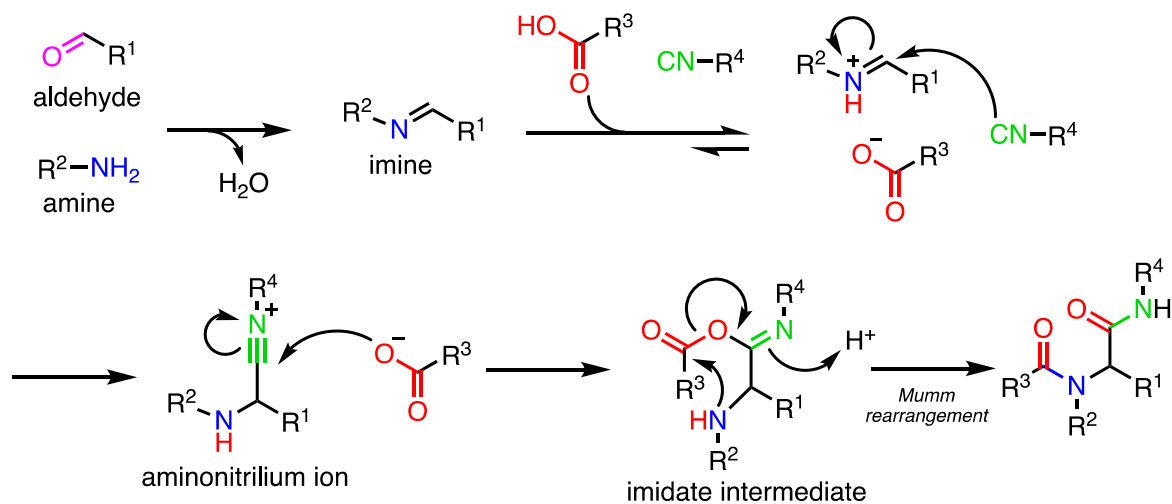

#### Oxime-Ugi reaction

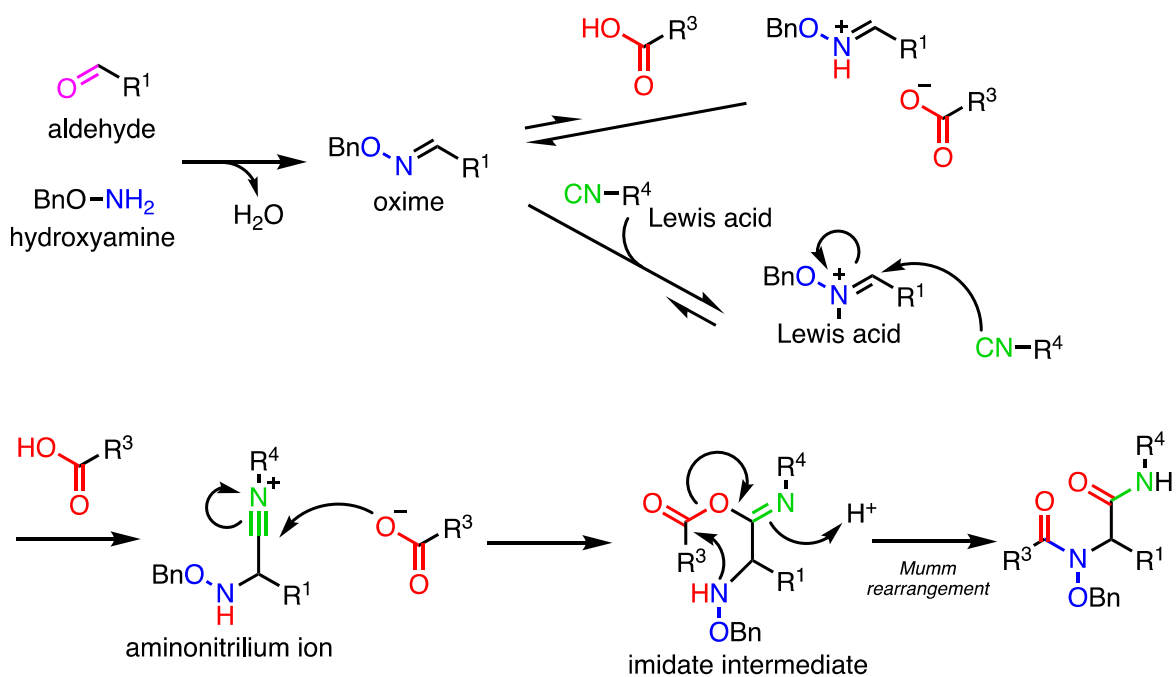

#### 4) Marfey's analysis of compound 15 and 16

##### LC analysis

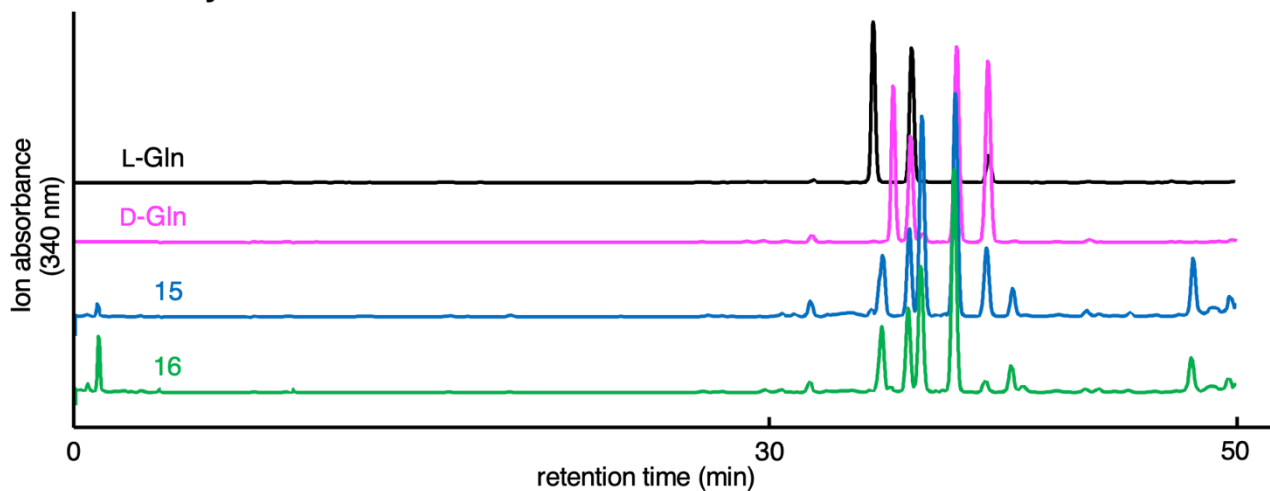

##### SIM analysis

Target m/z 400.2000 (+)

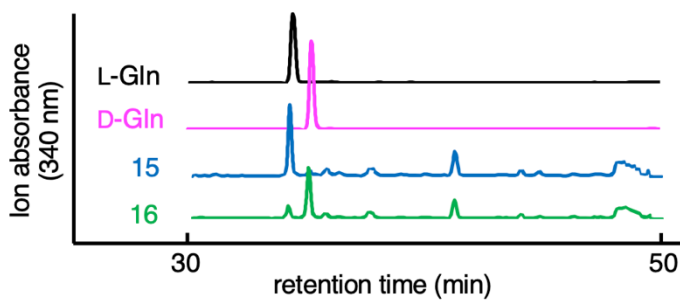

##### L-FDAA derivatives

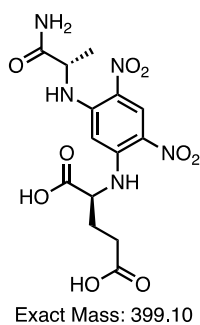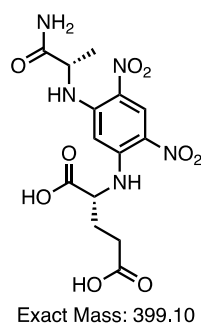

5) Comparison of  $^1\text{H}$  NMR and  $^{13}\text{C}$  NMR charts of natural and synthetic pseudouridimycin and *epi*-pseudouridimycin ( $\text{DMSO-}d_6$ )

$^1\text{H}$  NMR

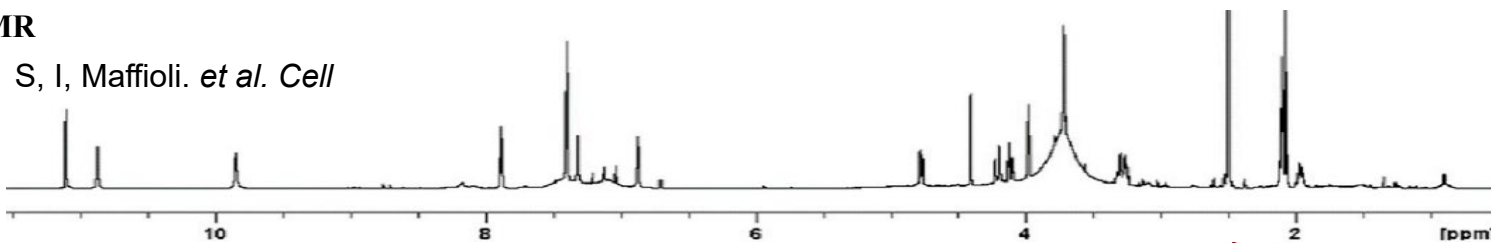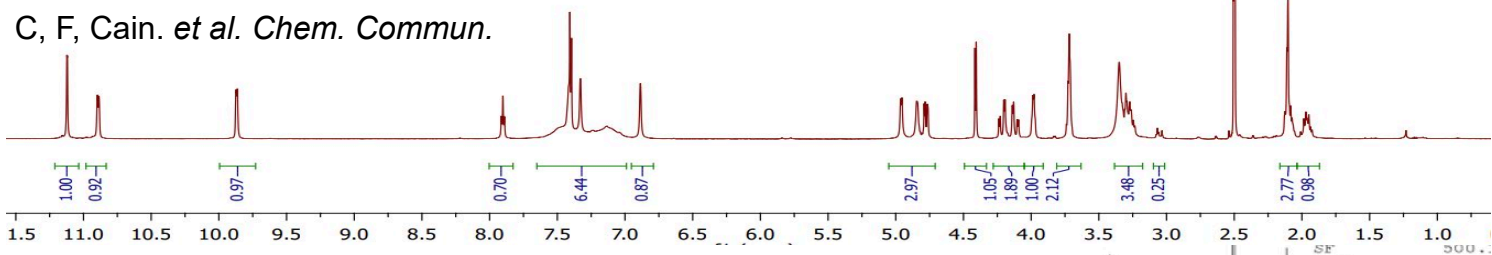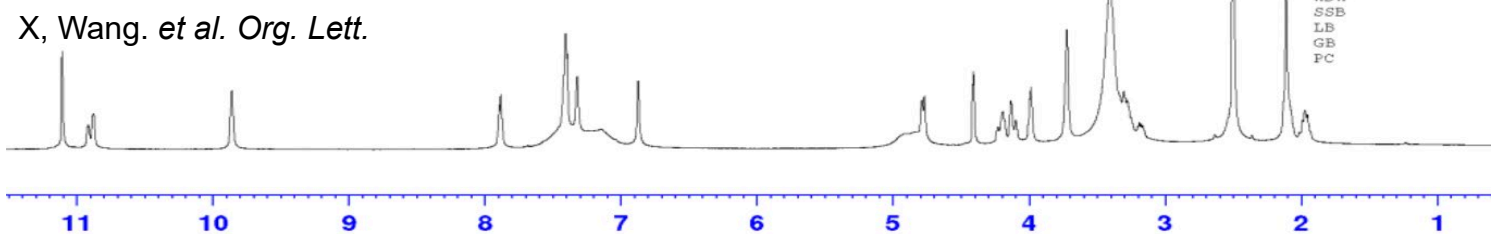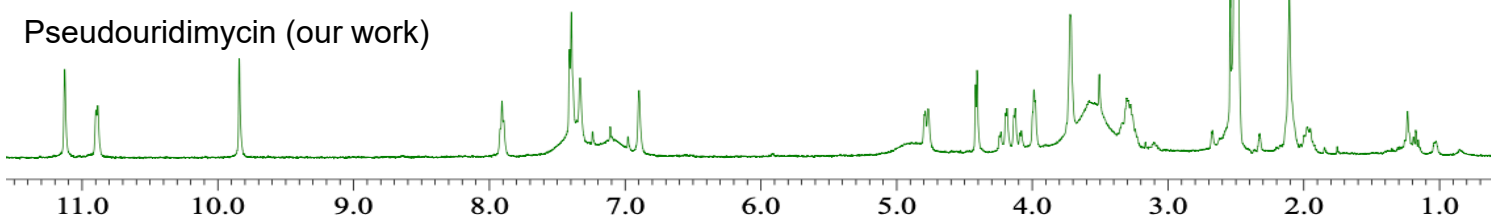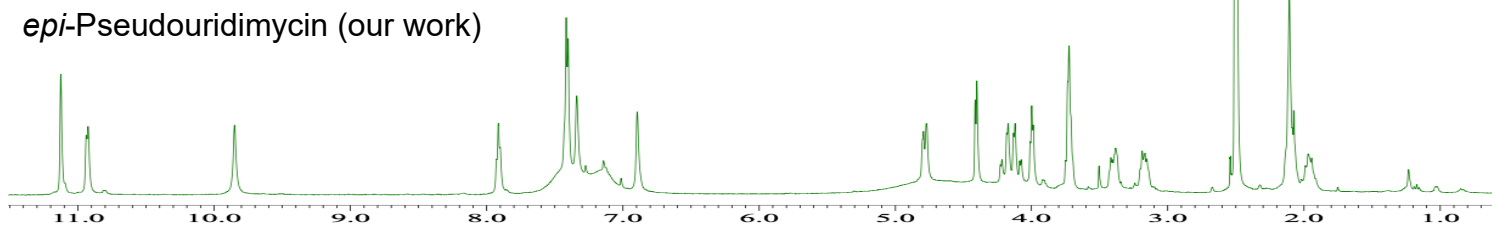

# <sup>13</sup>C NMR

C, F, Cain. *et al. Chem. Commun.*

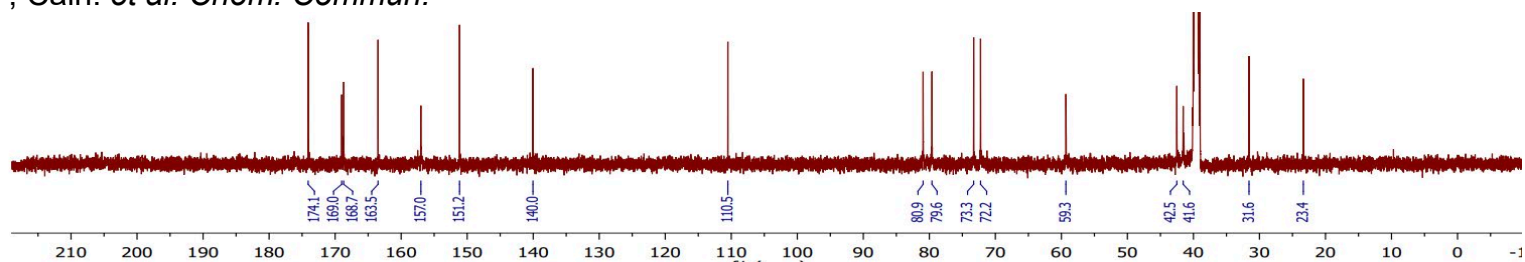

X, Wang. *et al. Org. Lett.*

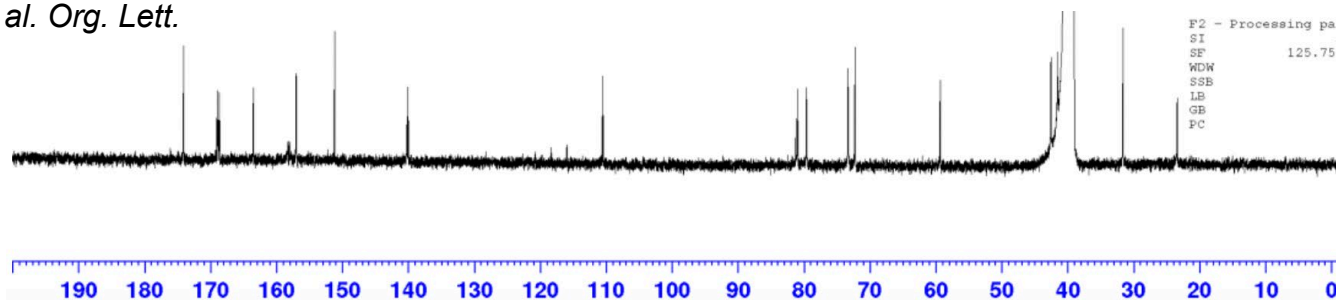

Pseudouridimycin (our work)

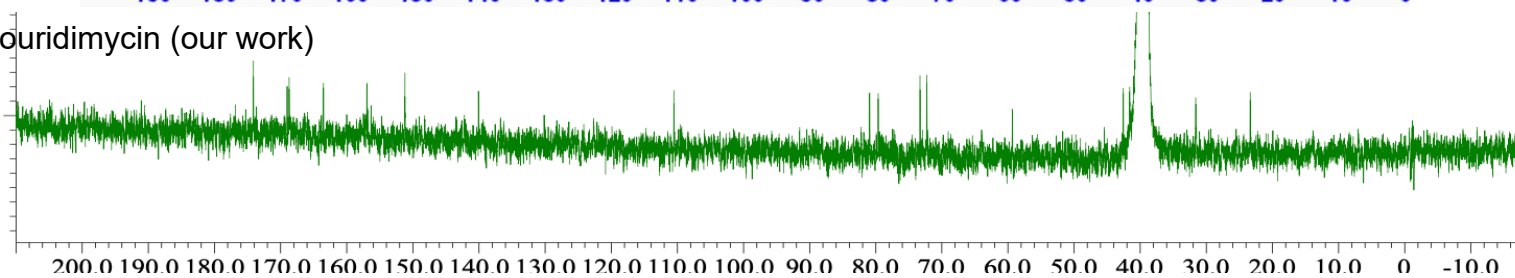

*epi*-Pseudouridimycin (our work)

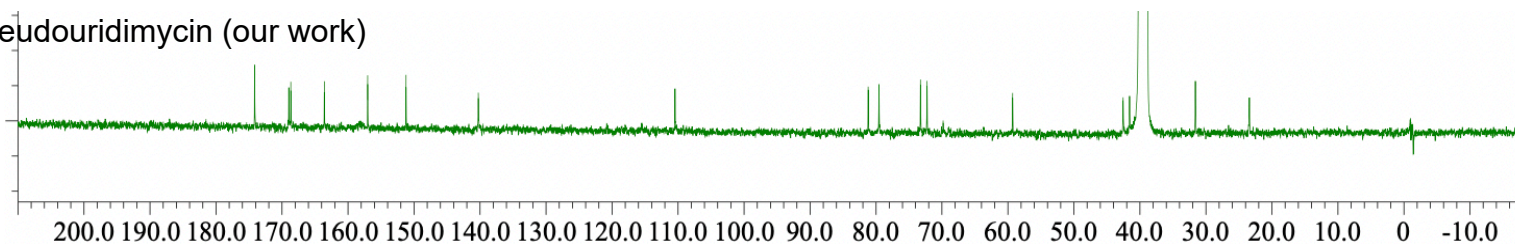

6) comparison of  $^1\text{H}$ -NMR and  $^{19}\text{F}$ -NMR charts of two types of pseudouridimycin and *epi*-pseudouridimycin salts (DMSO- $d_6$ )

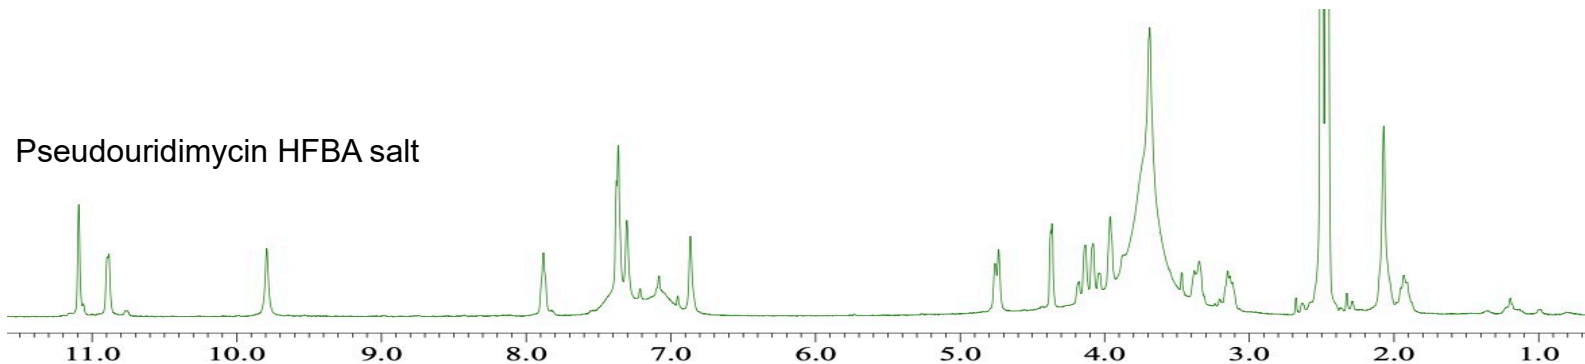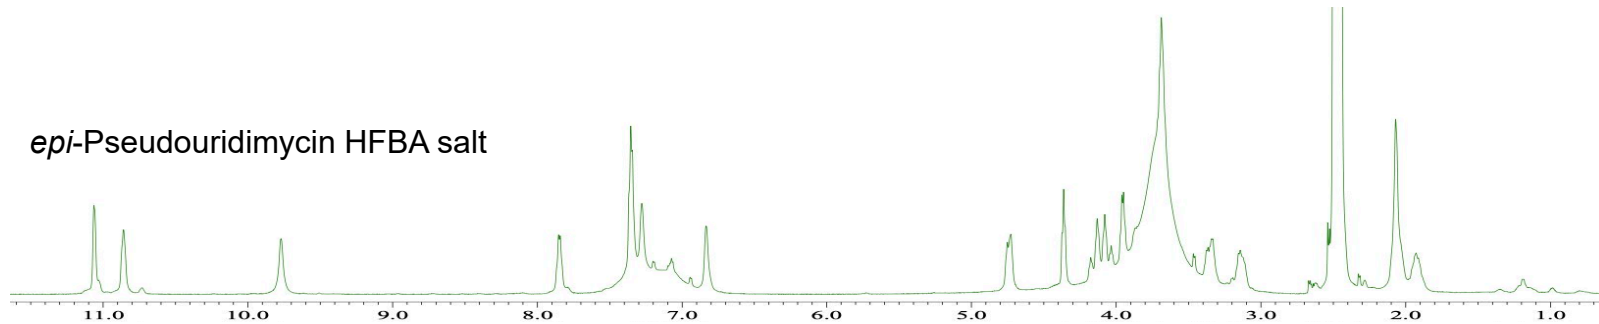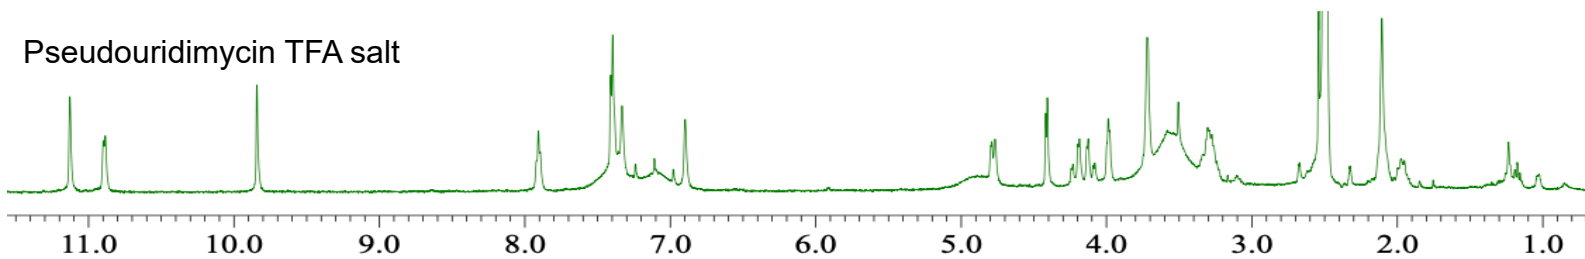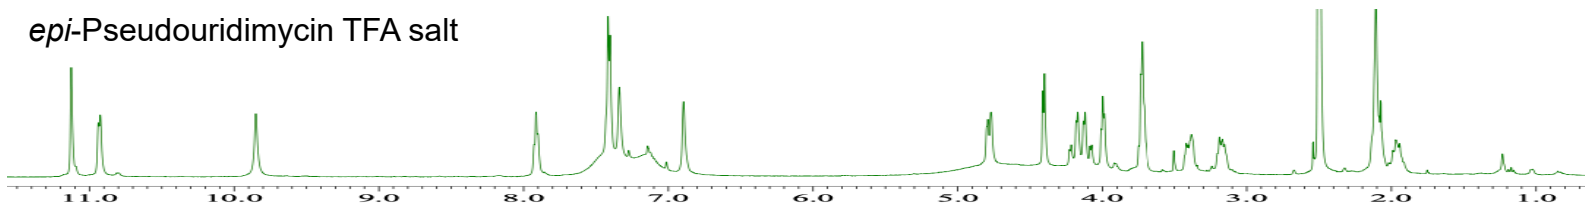



Pseudouridimycin HFBA salt

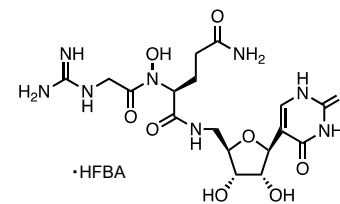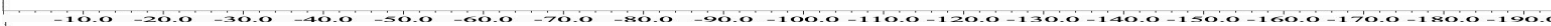

*epi*-Pseudouridimycin HFBA salt

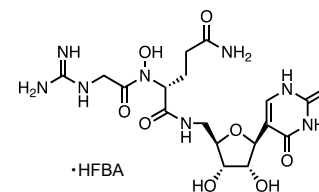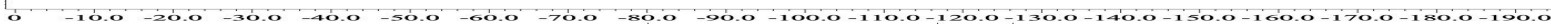

Pseudouridimycin TFA salt

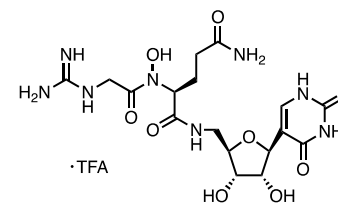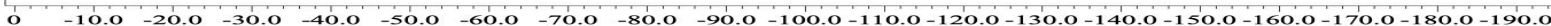

*epi*-Pseudouridimycin TFA salt

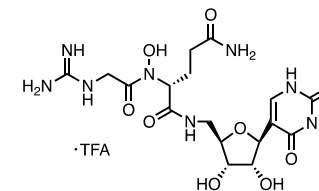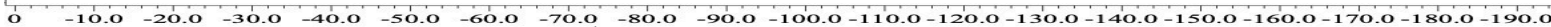

## 7) LR-MS and HR-MS charts of synthesized compounds

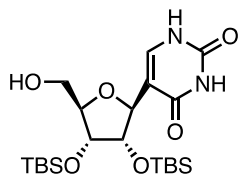

**2',3'-Di-O-tert-butylidimethylsilylpseudouridine**

Sample No. : C:\Xcalibur\...BG\_212101\_17OKW 2 Instrument : Exactive Plus  
 Operator name : Yamashita Nao  
 Date : 02/03/22 10:44:01  
 Instrumental method : C:\Xcalibur\methods\ESI\_100ul\S60\_100ul\_mz150\_2000pn.meth  
 Instrumental Analysis Division, Global Facility Center, Creative Research Institution, Hokkaido University

Mobile phase solvent : MeOH  
 Sample solvent : MeOH

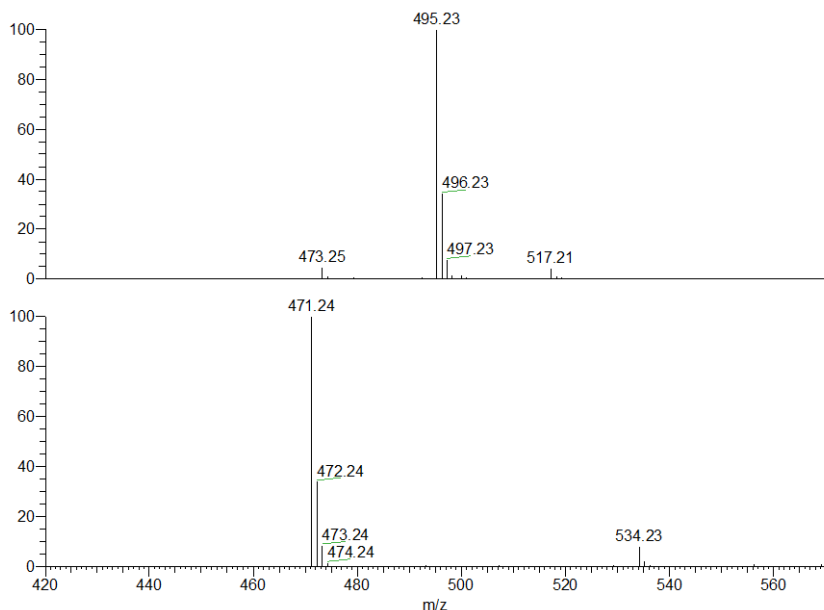

NL: 1.99E8  
 BG\_212101\_17OKW7-57\_pn2#20-34 RT: 0.32-0.49 AV: 7 T: FTMS + c ESI Full ms [150.00-2000.00]

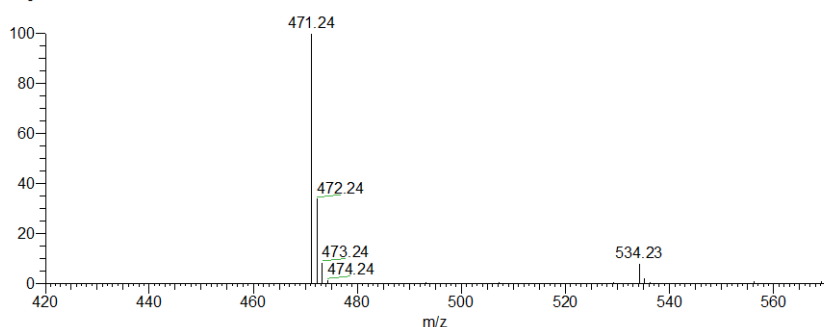

NL: 1.74E8  
 BG\_212101\_17OKW7-57\_pn2#20-34 RT: 0.31-0.50 AV: 8 T: FTMS - c ESI Full ms [150.00-2000.00]

Sample No. : C:\Xcalibur\...212101\_17OKW7-57\_pn2 Instrument : Exactive Plus  
 Operator name : Yamashita Nao  
 Date : 02/03/22 10:21:42  
 Instrumental method : C:\Xcalibur\methods\ESI\_100ul\S60\_100ul\_mz150\_2000pn.meth  
 Instrumental Analysis Division, Global Facility Center, Creative Research Institution, Hokkaido University

Mobile phase solvent : MeOH  
 Sample solvent : MeOH

212101\_17OKW7-57\_pn2 #20-23 RT: 0.32-0.35 AV: 2 NL: 2.95E7  
 T: FTMS + p ESI Full ms [150.0000-2000.0000]

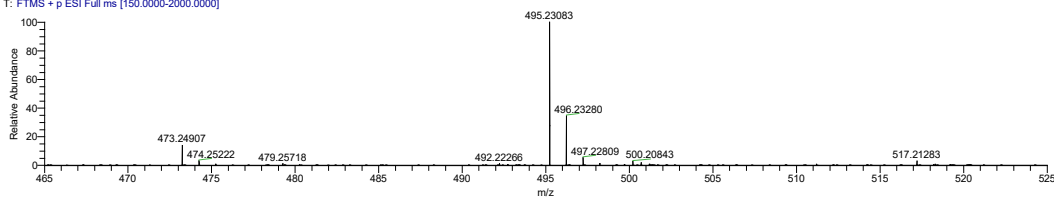

212101\_17OKW7-57\_pn2 #23-27 RT: 0.35-0.40 AV: 3 NL: 6.22E7  
 T: FTMS + p ESI Full ms [150.0000-2000.0000]

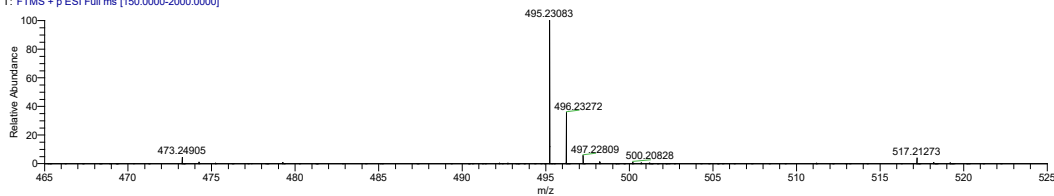

212101\_17OKW7-57\_pn2 #27-30 RT: 0.40-0.43 AV: 2 NL: 6.18E7  
 T: FTMS + p ESI Full ms [150.0000-2000.0000]

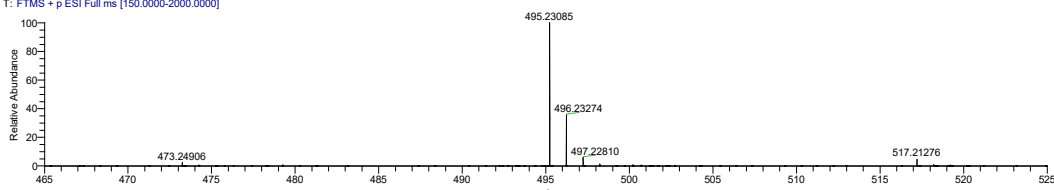

Elemental composition search on mass 495.23

m/z= 490.23-500.23

Isotope Min Max  
 N-14 0 2  
 O-16 0 15  
 C-12 0 100  
 H-1 0 200  
 Na-23 0 1  
 Si-28 0 2

Charge 1  
 Mass tolerance 5.00 ppm  
 Nitrogen rule not used  
 RDB equiv -1.00-100.00  
 max results 100

| m/z       | Theo. Mass | Delta (ppm) | RDB equiv. | Composition                                                                     |
|-----------|------------|-------------|------------|---------------------------------------------------------------------------------|
| 495.23083 | 495.23098  | -0.29       | 12.5       | C <sub>27</sub> H <sub>35</sub> O <sub>5</sub> N <sub>2</sub> Si                |
|           | 495.23103  | -0.40       | 4.0        | C <sub>21</sub> H <sub>37</sub> O <sub>12</sub> N                               |
|           | 495.23130  | -0.95       | 5.5        | C <sub>22</sub> H <sub>36</sub> O <sub>9</sub> N <sub>2</sub> Na                |
|           | 495.23144  | -1.22       | 3.0        | C <sub>20</sub> H <sub>41</sub> O <sub>9</sub> N <sub>2</sub> Si <sub>2</sub>   |
|           | 495.23171  | -1.78       | 4.5        | C <sub>21</sub> H <sub>40</sub> O <sub>6</sub> N <sub>2</sub> NaSi <sub>2</sub> |
|           | 495.23186  | -2.07       | 21.5       | C <sub>36</sub> H <sub>31</sub> O <sub>2</sub>                                  |
|           | 495.22945  | 2.78        | 18.5       | C <sub>34</sub> H <sub>32</sub> O <sub>2</sub> Na                               |
|           | 495.23259  | -3.56       | 13.5       | C <sub>30</sub> H <sub>36</sub> O <sub>3</sub> NaSi                             |
|           | 495.22903  | 3.63        | 0.0        | C <sub>18</sub> H <sub>42</sub> O <sub>9</sub> NNaSi <sub>2</sub>               |
|           | 495.22862  | 4.46        | 1.0        | C <sub>19</sub> H <sub>38</sub> O <sub>12</sub> NNa                             |
|           | 495.22857  | 4.56        | 9.5        | C <sub>25</sub> H <sub>36</sub> O <sub>5</sub> N <sub>2</sub> NaSi              |

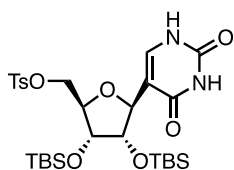

## 2',3'-Di-O-tert-butylidimethylsilyl-5'-O-p-toluenesulfonylpseudouridine

Sample No. : C:\Xcalibur\...BG\_212102\_7\_pU-O' \_  
 Operator name : Yamashita Nao  
 Date : 02/03/22 11:09:11  
 Instrumental method : C:\Xcalibur\methods\ESI\_100ul\S60\_100ul\_mz150\_2000pn.meth  
 Instrumental Analysis Division, Global Facility Center, Creative Research Institution, Hokkaido University

Instrument : Exactive Plus

Mobile phase solvent : MeOH  
 Sample solvent : MeOH

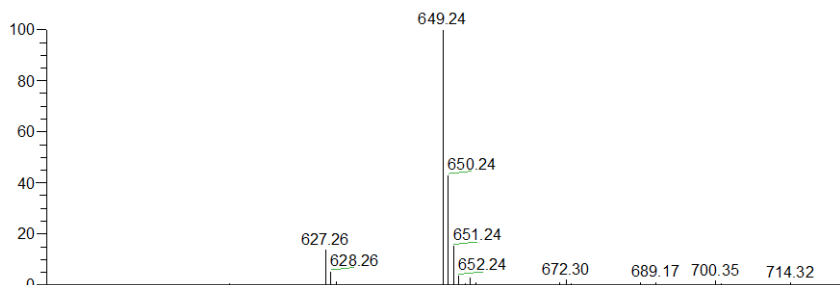

NL: 3.02E8  
 BG\_212102\_7\_pU-  
 OTs\_pn#20-34 RT:  
 0.32-0.48 AV: 7 T:  
 FTMS + c ESI Full ms  
 [150.00-2000.00]

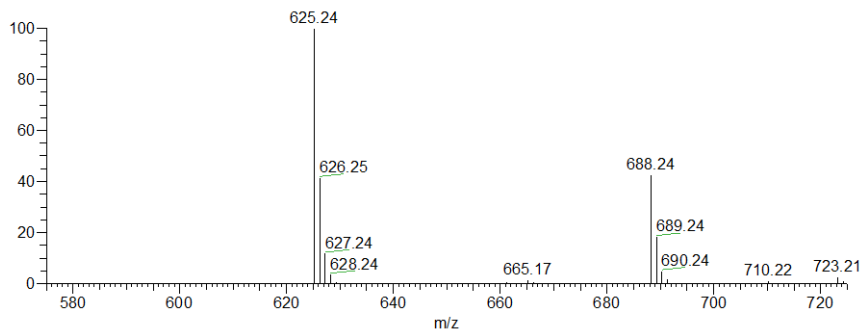

NL: 1.94E8  
 BG\_212102\_7\_pU-  
 OTs\_pn#20-34 RT:  
 0.30-0.50 AV: 8 T:  
 FTMS - c ESI Full ms  
 [150.00-2000.00]

Sample No. : C:\Xcalibur\...0203\212102\_7\_pU-OTs\_pn  
 Operator name : Yamashita Nao  
 Date : 02/03/22 10:40:51  
 Instrumental method : C:\Xcalibur\methods\ESI\_100ul\S60\_100ul\_mz150\_2000pn.meth  
 Instrumental Analysis Division, Global Facility Center, Creative Research Institution, Hokkaido University

Instrument : Exactive Plus

Mobile phase solvent : MeOH  
 Sample solvent : MeOH

212102\_7\_pU-OTs\_pn#20-23 RT: 0.32-0.34 AV: 2 NL: 3.77E7  
 T: FTMS + p ESI Full ms [150.0000-2000.0000]

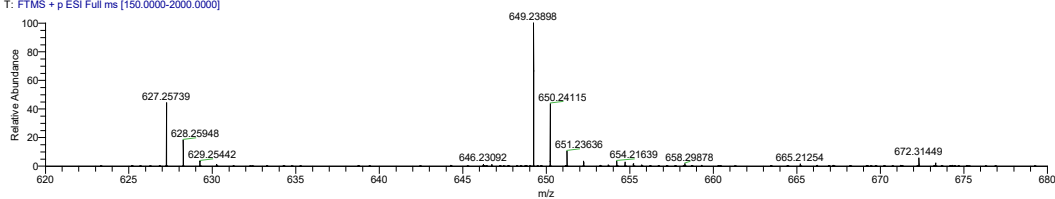

212102\_7\_pU-OTs\_pn#23-27 RT: 0.34-0.40 AV: 3 NL: 8.79E7  
 T: FTMS + p ESI Full ms [150.0000-2000.0000]

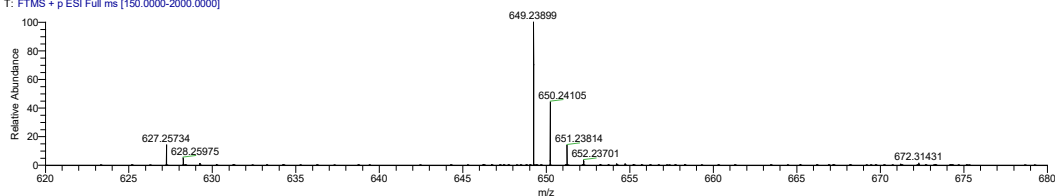

212102\_7\_pU-OTs\_pn#27-31 RT: 0.40-0.46 AV: 3 NL: 8.28E7  
 T: FTMS + p ESI Full ms [150.0000-2000.0000]

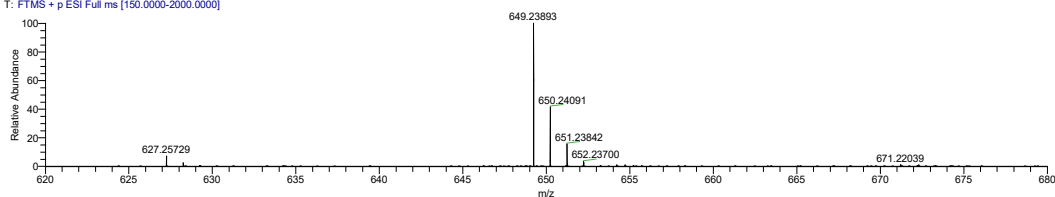

Elemental composition search on mass 649.24

m/z= 644.24-654.24

Isotope Min Max  
 N-14 0 2  
 O-16 0 15  
 C-12 0 100  
 H-1 0 200  
 Na-23 1 1  
 Si-28 0 2  
 S-32 0 1

Charge 1

Mass tolerance 5.00 ppm

Nitrogen rule not used

RDB equiv -1.00-100.00

max results 20

| m/z       | Theo. Mass | Delta (ppm) | RDB equiv. | Composition                                                                                    |
|-----------|------------|-------------|------------|------------------------------------------------------------------------------------------------|
| 649.23899 | 649.23871  | 0.43        | 21.5       | C <sub>40</sub> H <sub>42</sub> O <sub>4</sub> Na <sub>2</sub> Si <sub>2</sub>                 |
|           | 649.23830  | 1.06        | 22.5       | C <sub>41</sub> H <sub>38</sub> O <sub>4</sub> Na <sub>2</sub> Si                              |
|           | 649.23807  | 1.41        | 22.5       | C <sub>40</sub> H <sub>38</sub> O <sub>5</sub> Na <sub>2</sub> Si                              |
|           | 649.23992  | -1.44       | 9.5        | C <sub>28</sub> H <sub>42</sub> O <sub>12</sub> N <sub>2</sub> Na <sub>2</sub> Si              |
|           | 649.23788  | 1.71        | 4.0        | C <sub>25</sub> H <sub>48</sub> O <sub>11</sub> N <sub>2</sub> Na <sub>2</sub> Si <sub>2</sub> |
|           | 649.24015  | -1.79       | 9.5        | C <sub>29</sub> H <sub>42</sub> O <sub>11</sub> N <sub>2</sub> Na <sub>2</sub> Si              |
|           | 649.23761  | 2.12        | 32.0       | C <sub>47</sub> H <sub>32</sub> ONNa                                                           |
|           | 649.23747  | 2.34        | 5.0        | C <sub>26</sub> H <sub>44</sub> O <sub>14</sub> N <sub>2</sub> Na <sub>2</sub> Si              |
|           | 649.23742  | 2.42        | 13.5       | C <sub>32</sub> H <sub>42</sub> O <sub>7</sub> N <sub>2</sub> Na <sub>2</sub> Si <sub>2</sub>  |
|           | 649.24056  | -2.42       | 8.5        | C <sub>28</sub> H <sub>46</sub> O <sub>8</sub> N <sub>2</sub> Na <sub>2</sub> Si <sub>2</sub>  |
|           | 649.24061  | -2.50       | 0.0        | C <sub>22</sub> H <sub>48</sub> O <sub>15</sub> N <sub>2</sub> Na <sub>2</sub> Si <sub>2</sub> |
|           | 649.23724  | 2.69        | 5.0        | C <sub>25</sub> H <sub>44</sub> O <sub>15</sub> N <sub>2</sub> Na <sub>2</sub> Si              |
|           | 649.24075  | -2.71       | 27.0       | C <sub>43</sub> H <sub>36</sub> O <sub>2</sub> N <sub>2</sub> Na <sub>2</sub> Si               |
|           | 649.23719  | 2.77        | 13.5       | C <sub>31</sub> H <sub>42</sub> O <sub>8</sub> N <sub>2</sub> Na <sub>2</sub> Si <sub>2</sub>  |
|           | 649.24080  | -2.79       | 18.5       | C <sub>37</sub> H <sub>38</sub> O <sub>9</sub> Na <sub>2</sub> Si                              |
|           | 649.24098  | -3.07       | 27.0       | C <sub>44</sub> H <sub>36</sub> ONNa <sub>2</sub> Si                                           |
|           | 649.23678  | 3.40        | 14.5       | C <sub>32</sub> H <sub>38</sub> O <sub>11</sub> N <sub>2</sub> Na <sub>2</sub> Si              |
|           | 649.24121  | -3.42       | 17.5       | C <sub>36</sub> H <sub>42</sub> O <sub>6</sub> Na <sub>2</sub> Si <sub>2</sub>                 |
|           | 649.24144  | -3.78       | 17.5       | C <sub>37</sub> H <sub>42</sub> O <sub>5</sub> Na <sub>2</sub> Si <sub>2</sub>                 |

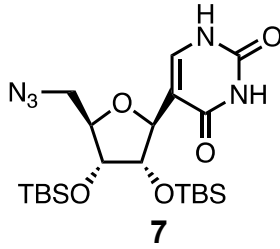

Sample No. : C:\Xcalibur\...BG\_212103\_7\_pU\_N3\_pn  
 Operator name : Yamashita Nao  
 Date : 02/03/22 11:23:09  
 Instrumental method : C:\Xcalibur\methods\ESI\_100ul\S60\_100ul\_mz150\_2000pn.meth  
 Instrumental Analysis Division, Global Facility Center, Creative Research Institution, Hokkaido University

Instrument : Exactive Plus

Mobile phase solvent : MeOH  
 Sample solvent : MeOH

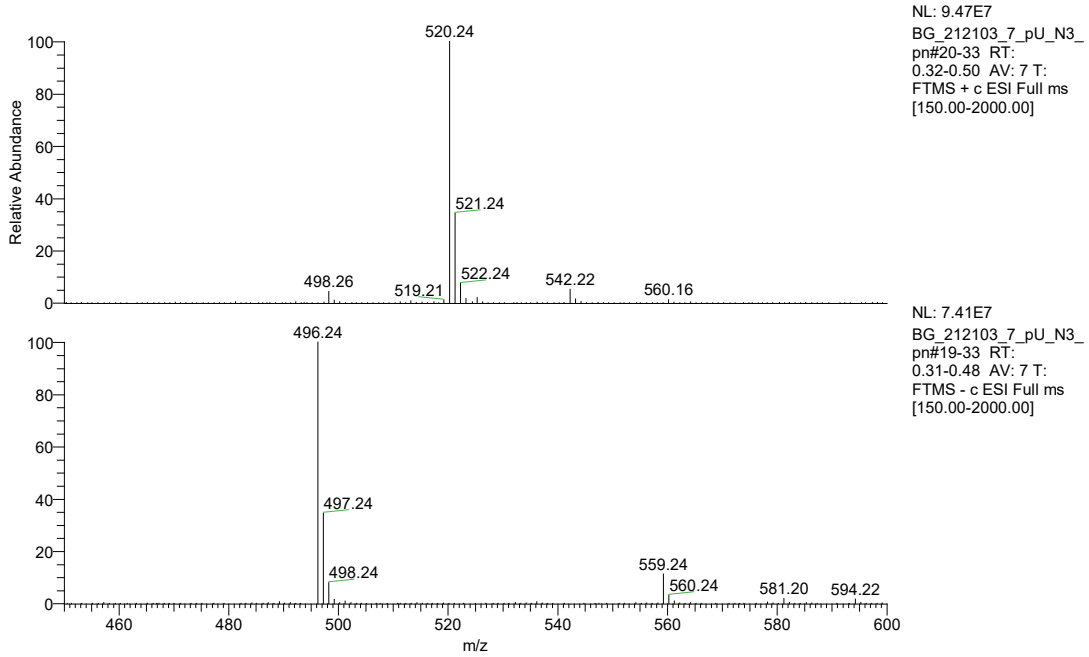

Sample No. : C:\Xcalibur\...0203\212103\_7\_pU\_N3\_pn  
 Operator name : Yamashita Nao  
 Date : 02/03/22 10:45:37  
 Instrumental method : C:\Xcalibur\methods\ESI\_100ul\S60\_100ul\_mz150\_2000pn.meth  
 Instrumental Analysis Division, Global Facility Center, Creative Research Institution, Hokkaido University

Instrument : Exactive Plus

Mobile phase solvent : MeOH  
 Sample solvent : MeOH

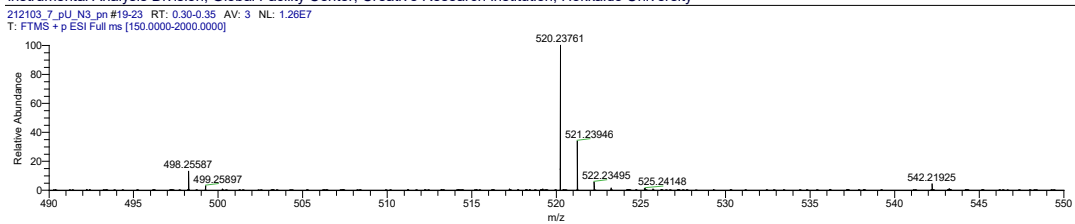

212103\_7\_pU\_N3\_pn#23-26 RT: 0.35-0.38 AV: 2 NL: 3.40E7  
 T: FTMS + p ESI Full ms [150.0000-2000.0000]

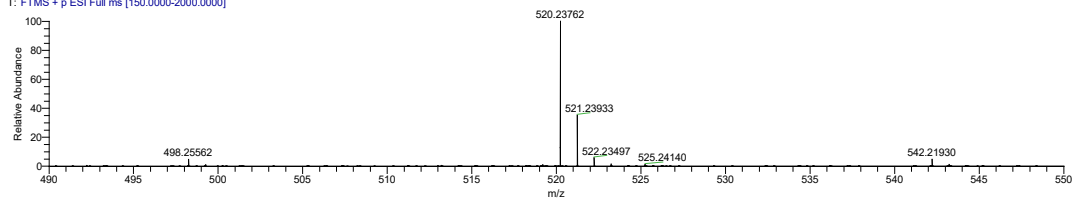

212103\_7\_pU\_N3\_pn#26-30 RT: 0.41-0.44 AV: 2 NL: 2.81E7  
 T: FTMS + p ESI Full ms [150.0000-2000.0000]

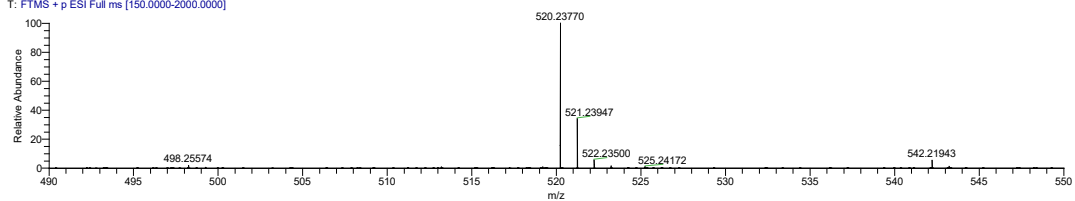

Elemental composition search on mass 520.24

m/z= 515.24-525.24

Isotope Min Max  
 N-14 0 10  
 O-16 0 15  
 C-12 0 100  
 H-1 0 200  
 Na-23 1 1  
 Si-28 0 2

Charge 1  
 Mass tolerance 5.00 ppm  
 Nitrogen rule not used  
 RDB equiv -1.00-100.00  
 max results 20

| m/z       | Theo. Mass | Delta (ppm) | RDB equiv. | Composition                                                                     |
|-----------|------------|-------------|------------|---------------------------------------------------------------------------------|
| 520.23762 | 520.23773  | -0.22       | 16.0       | C <sub>28</sub> H <sub>33</sub> O <sub>N</sub> <sub>6</sub> NaSi                |
|           | 520.23778  | -0.32       | 7.5        | C <sub>22</sub> H <sub>35</sub> O <sub>8</sub> N <sub>5</sub> Na                |
|           | 520.23728  | 0.66        | 20.0       | C <sub>36</sub> H <sub>33</sub> O <sub>2</sub> Na                               |
|           | 520.23819  | -1.10       | 6.5        | C <sub>21</sub> H <sub>39</sub> O <sub>5</sub> N <sub>5</sub> NaSi <sub>2</sub> |
|           | 520.23686  | 1.47        | 1.5        | C <sub>20</sub> H <sub>43</sub> O <sub>9</sub> N <sub>Na</sub> Si <sub>2</sub>  |
|           | 520.23685  | 1.48        | 7.0        | C <sub>19</sub> H <sub>37</sub> O <sub>4</sub> N <sub>8</sub> NaSi <sub>2</sub> |
|           | 520.23645  | 2.26        | 2.5        | C <sub>21</sub> H <sub>39</sub> O <sub>12</sub> N <sub>Na</sub>                 |
|           | 520.23644  | 2.27        | 8.0        | C <sub>20</sub> H <sub>33</sub> O <sub>7</sub> N <sub>8</sub> Na                |
|           | 520.23639  | 2.35        | 11.0       | C <sub>27</sub> H <sub>37</sub> O <sub>5</sub> N <sub>2</sub> NaSi              |
|           | 520.23639  | 2.36        | 16.5       | C <sub>26</sub> H <sub>31</sub> N <sub>9</sub> NaSi                             |
|           | 520.23908  | -2.80       | 15.5       | C <sub>30</sub> H <sub>35</sub> O <sub>2</sub> N <sub>3</sub> NaSi              |
|           | 520.23912  | -2.89       | 12.5       | C <sub>23</sub> H <sub>31</sub> O <sub>4</sub> N <sub>9</sub> Na                |
|           | 520.23913  | -2.90       | 7.0        | C <sub>24</sub> H <sub>37</sub> O <sub>9</sub> N <sub>2</sub> Na                |
|           | 520.23593  | 3.24        | 20.5       | C <sub>34</sub> H <sub>31</sub> O <sub>N</sub> <sub>3</sub> Na                  |
|           | 520.23953  | -3.67       | 11.5       | C <sub>22</sub> H <sub>35</sub> O <sub>N</sub> <sub>9</sub> NaSi <sub>2</sub>   |
|           | 520.23954  | -3.68       | 6.0        | C <sub>23</sub> H <sub>41</sub> O <sub>6</sub> N <sub>2</sub> NaSi <sub>2</sub> |
|           | 520.23958  | -3.77       | 3.0        | C <sub>16</sub> H <sub>37</sub> O <sub>8</sub> N <sub>8</sub> NaSi              |
|           | 520.23556  | 3.96        | -1.0       | C <sub>11</sub> H <sub>37</sub> O <sub>10</sub> N <sub>10</sub> NaSi            |
|           | 520.23551  | 4.05        | 2.0        | C <sub>18</sub> H <sub>41</sub> O <sub>8</sub> N <sub>4</sub> NaSi <sub>2</sub> |
|           | 520.23510  | 4.84        | 3.0        | C <sub>19</sub> H <sub>37</sub> O <sub>11</sub> N <sub>4</sub> Na               |

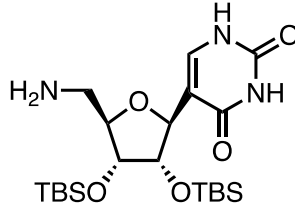

8

Sample No. : C:\Xcalibur\...BG\_212104\_7\_pU\_NH2\_pn  
 Operator name : Yamashita Nao  
 Date : 02/03/22 11:52:24  
 Instrumental method : C:\Xcalibur\methods\ESI\_100ul\S60\_100ul\_mz150\_2000pn.meth  
 Instrumental Analysis Division, Global Facility Center, Creative Research Institution, Hokkaido University

Instrument : Exactive Plus

Mobile phase solvent : MeOH  
 Sample solvent : MeOH

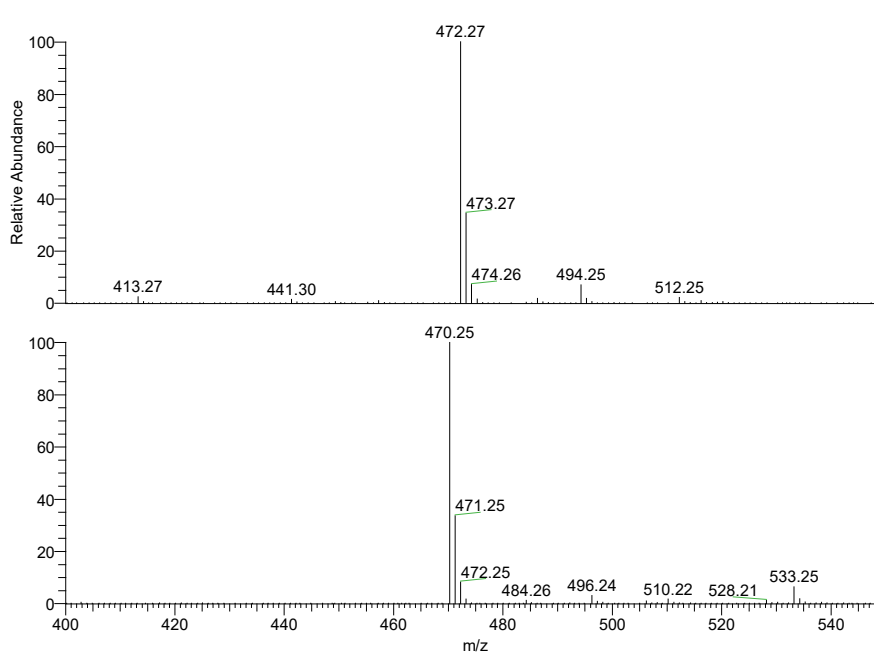

NL: 5.19E8  
 BG\_212104\_7\_pU\_NH2\_pn#20-33 RT: 0.32-0.49 AV: 7 T: FTMS + c ESI Full ms [150.00-2000.00]

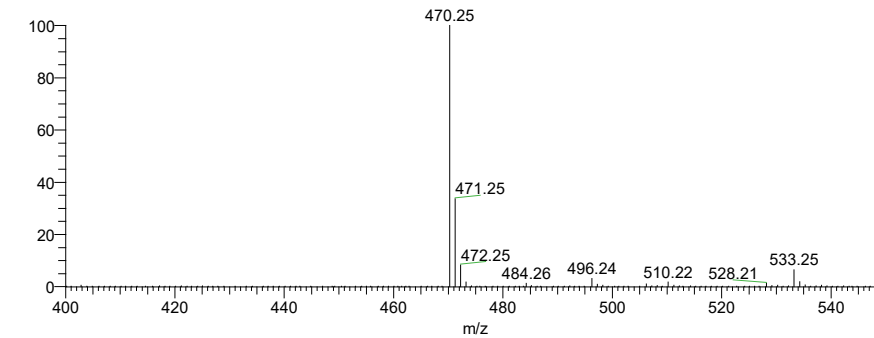

NL: 5.33E7  
 BG\_212104\_7\_pU\_NH2\_pn#19-33 RT: 0.31-0.48 AV: 7 T: FTMS - c ESI Full ms [150.00-2000.00]

Sample No. : C:\Xcalibur\...0203\212104\_7\_pU\_NH2\_pn  
 Operator name : Yamashita Nao  
 Date : 02/03/22 11:45:03  
 Instrumental method : C:\Xcalibur\methods\ESI\_100ul\S60\_100ul\_mz150\_2000pn.meth  
 Instrumental Analysis Division, Global Facility Center, Creative Research Institution, Hokkaido University

Instrument : Exactive Plus

Mobile phase solvent : MeOH  
 Sample solvent : MeOH

212104\_7\_pU\_NH2\_pn #19-23 RT: 0.29-0.35 AV: 3 NL: 6.51E7  
 T: FTMS + p ESI Full ms [150.0000-2000.0000]

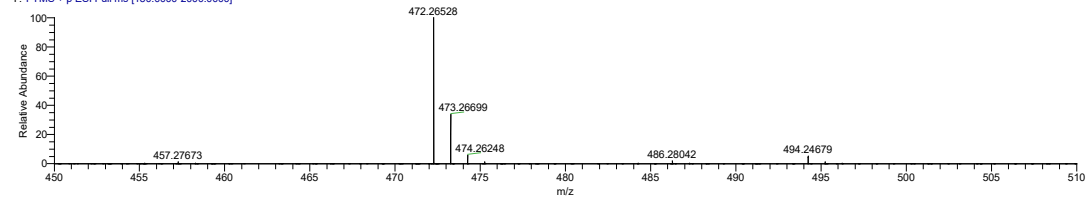

212104\_7\_pU\_NH2\_pn #23-26 RT: 0.35-0.38 AV: 2 NL: 2.00E8  
 T: FTMS + p ESI Full ms [150.0000-2000.0000]

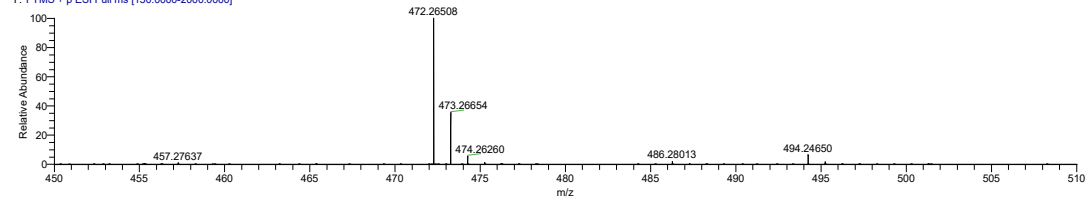

212104\_7\_pU\_NH2\_pn #26-30 RT: 0.41-0.44 AV: 2 NL: 1.38E8  
 T: FTMS + p ESI Full ms [150.0000-2000.0000]

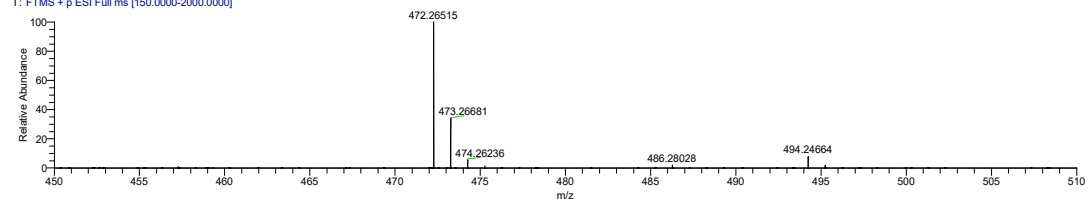



Elemental composition search on mass 472.27

m/z= 467.27-477.27

Isotope Min Max  
 N-14 0 5  
 O-16 0 10  
 C-12 0 100  
 H-1 0 200  
 Si-28 0 2

Charge 1  
 Mass tolerance 5.00 ppm  
 Nitrogen rule not used  
 RDB equiv -1.00-100.00  
 max results 20

| m/z       | Theo. Mass | Delta (ppm) | RDB equiv. | Composition                                                                   |
|-----------|------------|-------------|------------|-------------------------------------------------------------------------------|
| 472.26508 | 472.26529  | -0.44       | 14.0       | C <sub>28</sub> H <sub>36</sub> O <sub>N</sub> <sub>4</sub> Si                |
|           | 472.26534  | -0.55       | 5.5        | C <sub>22</sub> H <sub>38</sub> O <sub>8</sub> N <sub>3</sub>                 |
|           | 472.26575  | -1.42       | 4.5        | C <sub>21</sub> H <sub>42</sub> O <sub>5</sub> N <sub>3</sub> Si <sub>2</sub> |
|           | 472.26395  | 2.39        | 9.0        | C <sub>27</sub> H <sub>40</sub> O <sub>5</sub> Si                             |
|           | 472.26663  | -3.29       | 13.5       | C <sub>30</sub> H <sub>38</sub> O <sub>2</sub> N <sub>3</sub> Si              |
|           | 472.26349  | 3.36        | 18.5       | C <sub>34</sub> H <sub>34</sub> ON                                            |
|           | 472.26668  | -3.40       | 5.0        | C <sub>24</sub> H <sub>40</sub> O <sub>9</sub>                                |
|           | 472.26307  | 4.25        | 0.0        | C <sub>18</sub> H <sub>44</sub> O <sub>8</sub> N <sub>2</sub> Si <sub>2</sub> |
|           | 472.26709  | -4.26       | 4.0        | C <sub>23</sub> H <sub>44</sub> O <sub>6</sub> Si <sub>2</sub>                |

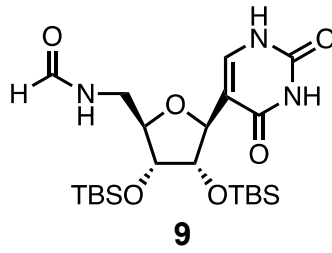

Sample No. : C:\Xcalibur\...BG\_212105\_7\_pU\_formA\_pn  
 Operator name : Yamashita Nao  
 Date : 02/03/22 13:12:41  
 Instrumental method : C:\Xcalibur\methods\ESI\_100ul\60\_100ul\_mz150\_2000pn.meth

Instrument : Exactive Plus

Mobile phase solvent : MeOH  
 Sample solvent : MeOH

Instrumental Analysis Division, Global Facility Center, Creative Research Institution, Hokkaido University

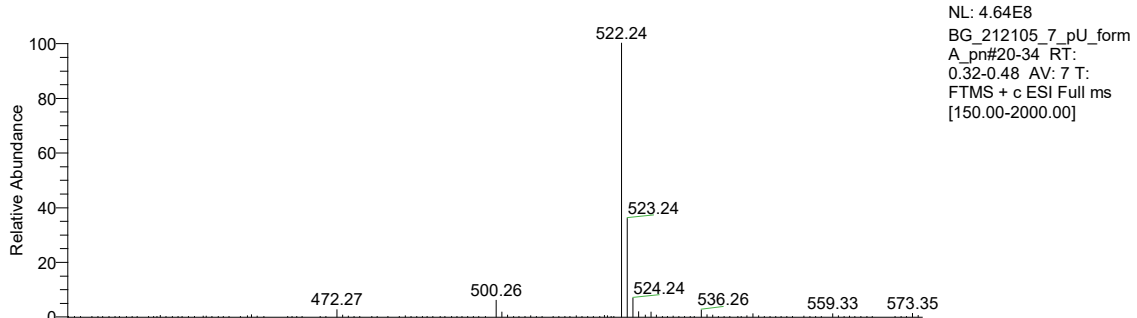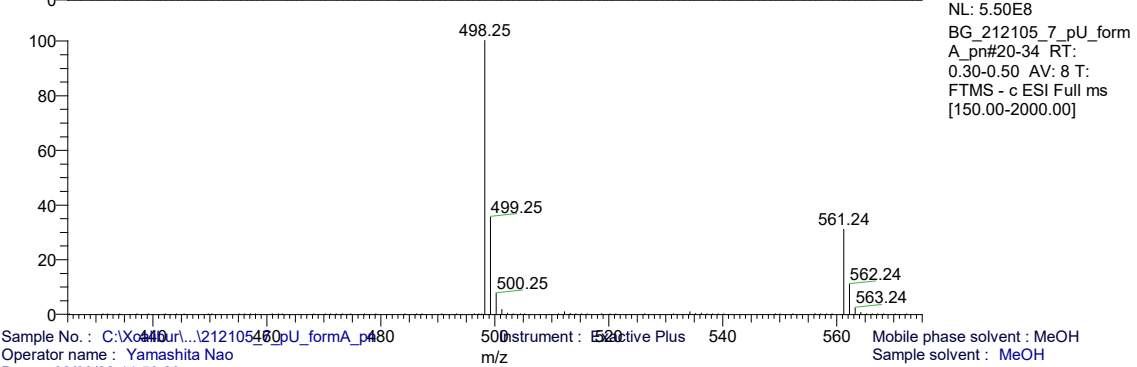

Sample No. : C:\Xcalibur\...212105\_7\_pU\_formA\_p480  
 Operator name : Yamashita Nao  
 Date : 02/03/22 11:50:23

Instrument : Exactive Plus

Mobile phase solvent : MeOH  
 Sample solvent : MeOH

Instrumental method : C:\Xcalibur\methods\ESI\_100ul\60\_100ul\_mz150\_2000pn.meth  
 Instrumental Analysis Division, Global Facility Center, Creative Research Institution, Hokkaido University

212105\_7\_pU\_formA\_pn#20-23 RT: 0.32-0.35 AV: 2 NL: 6.45E7  
 T: FTMS + p ESI Full ms [150.0000-2000.0000]

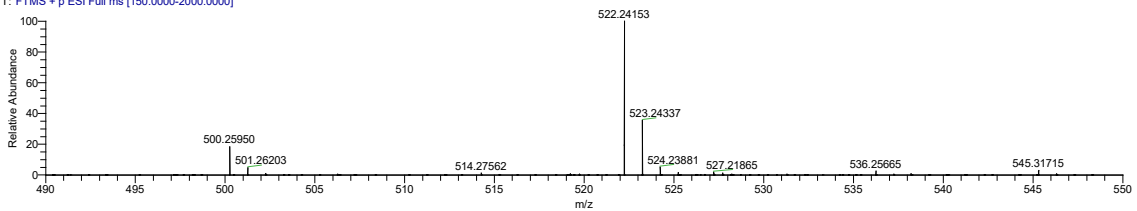

212105\_7\_pU\_formA\_pn#23-27 RT: 0.35-0.40 AV: 3 NL: 1.30E8  
 T: FTMS + p ESI Full ms [150.0000-2000.0000]

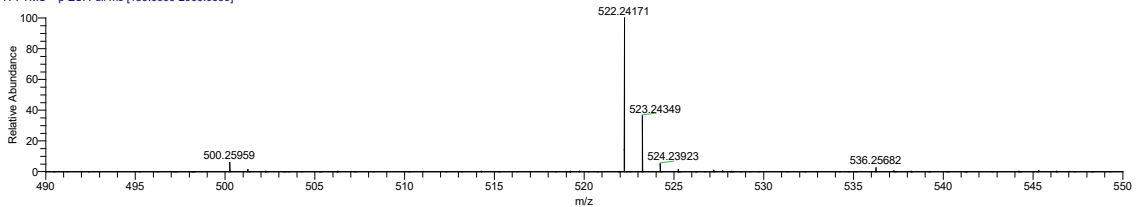

212105\_7\_pU\_formA\_pn#27-31 RT: 0.40-0.46 AV: 3 NL: 1.36E8  
 T: FTMS + p ESI Full ms [150.0000-2000.0000]

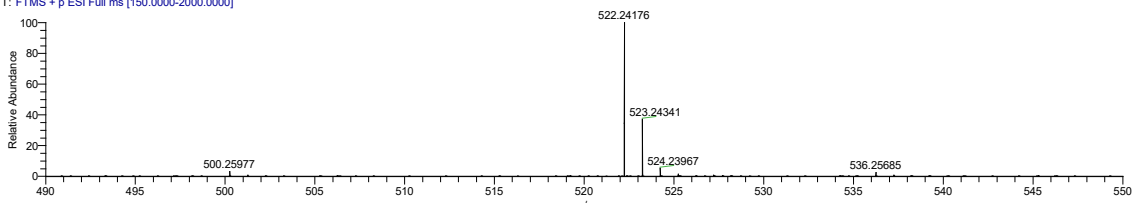

Elemental composition search on mass 522.24

m/z= 517.24-527.24

Isotope Min Max  
 N-14 0 5  
 O-16 0 10  
 C-12 0 100  
 H-1 0 200  
 Si-28 0 2  
 Na-23 0 1

Charge 1

Mass tolerance 5.00 ppm

Nitrogen rule not used

RDB equiv -1.00-100.00

max results 20

| m/z       | Theo. Mass | Delta (ppm) | RDB equiv. | Composition                                                                     |
|-----------|------------|-------------|------------|---------------------------------------------------------------------------------|
| 522.24171 | 522.24187  | -0.31       | 13.5       | C <sub>28</sub> H <sub>36</sub> O <sub>5</sub> N <sub>3</sub> Si                |
|           | 522.24141  | 0.57        | 23.0       | C <sub>35</sub> H <sub>30</sub> ON <sub>4</sub>                                 |
|           | 522.24215  | -0.84       | 15.0       | C <sub>29</sub> H <sub>35</sub> O <sub>2</sub> N <sub>4</sub> NaSi              |
|           | 522.24220  | -0.94       | 6.5        | C <sub>23</sub> H <sub>37</sub> O <sub>9</sub> N <sub>3</sub> Na                |
|           | 522.24234  | -1.20       | 4.0        | C <sub>21</sub> H <sub>42</sub> O <sub>9</sub> N <sub>2</sub> Si <sub>2</sub>   |
|           | 522.24099  | 1.37        | 4.5        | C <sub>19</sub> H <sub>40</sub> O <sub>8</sub> N <sub>5</sub> Si <sub>2</sub>   |
|           | 522.24081  | 1.72        | 10.0       | C <sub>28</sub> H <sub>39</sub> O <sub>6</sub> NaSi                             |
|           | 522.24261  | -1.72       | 5.5        | C <sub>22</sub> H <sub>41</sub> O <sub>6</sub> N <sub>3</sub> NaSi <sub>2</sub> |
|           | 522.24276  | -2.00       | 22.5       | C <sub>37</sub> H <sub>32</sub> O <sub>2</sub> N                                |
|           | 522.24048  | 2.35        | 17.0       | C <sub>33</sub> H <sub>38</sub> O <sub>2</sub> Si <sub>2</sub>                  |
|           | 522.24035  | 2.60        | 19.5       | C <sub>35</sub> H <sub>33</sub> O <sub>2</sub> NNa                              |
|           | 522.24322  | -2.89       | 13.0       | C <sub>30</sub> H <sub>38</sub> O <sub>6</sub> Si                               |
|           | 522.24008  | 3.13        | 18.0       | C <sub>34</sub> H <sub>34</sub> O <sub>5</sub>                                  |
|           | 522.23993  | 3.41        | 1.0        | C <sub>19</sub> H <sub>43</sub> O <sub>9</sub> N <sub>2</sub> NaSi <sub>2</sub> |
|           | 522.24349  | -3.41       | 14.5       | C <sub>31</sub> H <sub>37</sub> O <sub>3</sub> NNaSi                            |
|           | 522.24354  | -3.51       | 6.0        | C <sub>25</sub> H <sub>39</sub> O <sub>10</sub> Na                              |
|           | 522.23947  | 4.29        | 10.5       | C <sub>26</sub> H <sub>37</sub> O <sub>5</sub> N <sub>3</sub> NaSi              |
|           | 522.24395  | -4.29       | 5.0        | C <sub>24</sub> H <sub>43</sub> O <sub>7</sub> NaSi <sub>2</sub>                |
|           | 522.23919  | 4.82        | 9.0        | C <sub>25</sub> H <sub>38</sub> O <sub>8</sub> N <sub>2</sub> Si                |
|           | 522.23914  | 4.92        | 17.5       | C <sub>31</sub> H <sub>36</sub> ON <sub>3</sub> Si <sub>2</sub>                 |

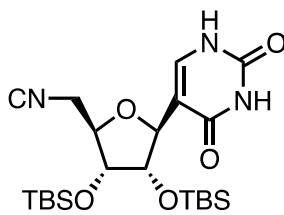

**10**

Sample No. : C:\Xcalibur\...BG\_212106\_7\_pU\_isocy\_pn

Instrument : Exactive Plus

Mobile phase solvent : MeOH

Operator name : Yamashita Nao

Sample solvent : MeOH

Date : 02/03/22 13:20:12

Instrumental method : C:\Xcalibur\methods\ESI\_100ul\S60\_100ul\_mz150\_2000pn.meth

Instrumental Analysis Division, Global Facility Center, Creative Research Institution, Hokkaido University

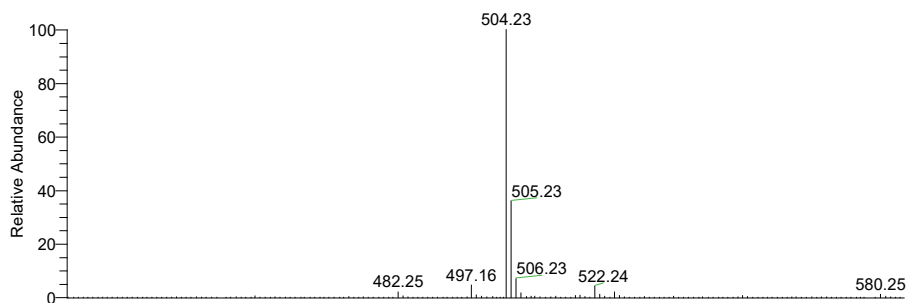

NL: 5.07E8  
BG\_212106\_7\_pU\_isocy\_pn#20-34 RT: 0.32-0.49 AV: 7 T: FTMS + c ESI Full ms [150.00-2000.00]

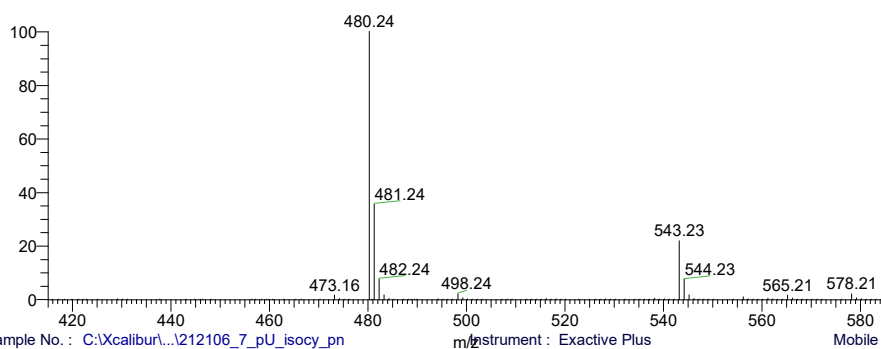

NL: 5.07E8  
BG\_212106\_7\_pU\_isocy\_pn#20-34 RT: 0.31-0.50 AV: 8 T: FTMS - c ESI Full ms [150.00-2000.00]

Sample No. : C:\Xcalibur\...212106\_7\_pU\_isocy\_pn

Instrument : Exactive Plus

Mobile phase solvent : MeOH

Operator name : Yamashita Nao

Sample solvent : MeOH

Date : 02/03/22 11:55:09

Instrumental method : C:\Xcalibur\methods\ESI\_100ul\S60\_100ul\_mz150\_2000pn.meth

Instrumental Analysis Division, Global Facility Center, Creative Research Institution, Hokkaido University

212106\_7\_pU\_isocy\_pn #20-23 RT: 0.32-0.35 AV: 2 NL: 7.36E7  
T: FTMS + p ESI Full ms [150.0000-2000.0000]

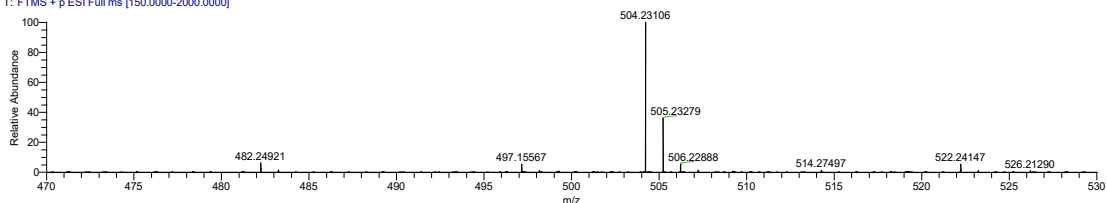

212106\_7\_pU\_isocy\_pn #23-27 RT: 0.35-0.40 AV: 3 NL: 1.59E8  
T: FTMS + p ESI Full ms [150.0000-2000.0000]

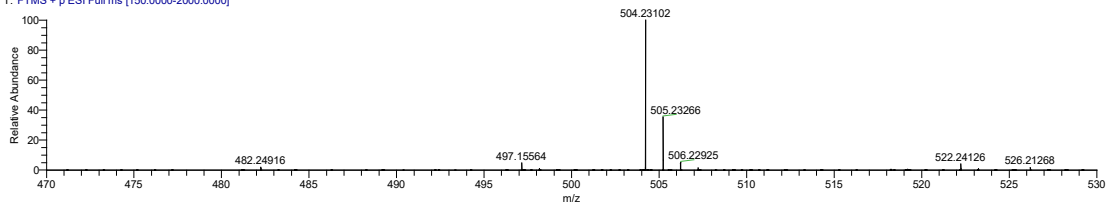

212106\_7\_pU\_isocy\_pn #27-30 RT: 0.40-0.43 AV: 2 NL: 1.71E8  
T: FTMS + p ESI Full ms [150.0000-2000.0000]

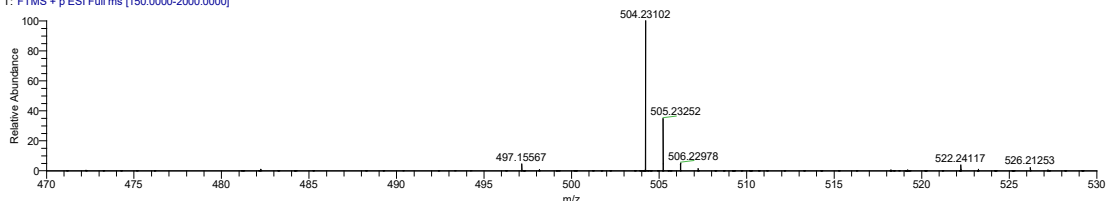

Elemental composition search on mass 504.23

m/z= 499.23-509.23

Isotope Min Max  
 N-14 0 5  
 O-16 0 10  
 C-12 0 100  
 H-1 0 200  
 Si-28 0 2  
 Na-23 0 1

Charge 1  
 Mass tolerance 5.00 ppm

Nitrogen rule not used

RDB equiv -1.00-100.00

max results 20

| m/z       | Theo. Mass | Delta (ppm) | RDB equiv. | Composition                                                                     |
|-----------|------------|-------------|------------|---------------------------------------------------------------------------------|
| 504.23102 | 504.23085  | 0.34        | 24.0       | C <sub>35</sub> H <sub>28</sub> N <sub>4</sub>                                  |
|           | 504.23131  | -0.57       | 14.5       | C <sub>28</sub> H <sub>34</sub> O <sub>4</sub> N <sub>3</sub> Si                |
|           | 504.23158  | -1.12       | 16.0       | C <sub>29</sub> H <sub>33</sub> ON <sub>4</sub> NaSi                            |
|           | 504.23043  | 1.17        | 5.5        | C <sub>19</sub> H <sub>38</sub> O <sub>7</sub> N <sub>5</sub> Si <sub>2</sub>   |
|           | 504.23164  | -1.22       | 7.5        | C <sub>23</sub> H <sub>35</sub> O <sub>8</sub> N <sub>3</sub> Na                |
|           | 504.23177  | -1.49       | 5.0        | C <sub>21</sub> H <sub>40</sub> O <sub>8</sub> N <sub>2</sub> Si <sub>2</sub>   |
|           | 504.23025  | 1.53        | 11.0       | C <sub>28</sub> H <sub>37</sub> O <sub>5</sub> NaSi                             |
|           | 504.23002  | 1.99        | 6.5        | C <sub>20</sub> H <sub>34</sub> O <sub>10</sub> N <sub>5</sub>                  |
|           | 504.23205  | -2.03       | 6.5        | C <sub>22</sub> H <sub>39</sub> O <sub>5</sub> N <sub>3</sub> NaSi <sub>2</sub> |
|           | 504.22992  | 2.18        | 18.0       | C <sub>33</sub> H <sub>36</sub> O <sub>5</sub> Si <sub>2</sub>                  |
|           | 504.23219  | -2.32       | 23.5       | C <sub>37</sub> H <sub>30</sub> ON                                              |
|           | 504.22979  | 2.45        | 20.5       | C <sub>35</sub> H <sub>31</sub> ONNa                                            |
|           | 504.22951  | 2.99        | 19.0       | C <sub>34</sub> H <sub>32</sub> O <sub>4</sub>                                  |
|           | 504.23265  | -3.24       | 14.0       | C <sub>30</sub> H <sub>36</sub> O <sub>5</sub> Si                               |
|           | 504.22937  | 3.28        | 2.0        | C <sub>19</sub> H <sub>41</sub> O <sub>8</sub> N <sub>2</sub> NaSi <sub>2</sub> |
|           | 504.23293  | -3.78       | 15.5       | C <sub>31</sub> H <sub>35</sub> O <sub>2</sub> N <sub>2</sub> NaSi              |
|           | 504.23298  | -3.88       | 7.0        | C <sub>25</sub> H <sub>37</sub> O <sub>9</sub> Na                               |
|           | 504.22890  | 4.20        | 11.5       | C <sub>26</sub> H <sub>35</sub> O <sub>4</sub> N <sub>3</sub> NaSi              |
|           | 504.23339  | -4.70       | 6.0        | C <sub>24</sub> H <sub>41</sub> O <sub>6</sub> NaSi <sub>2</sub>                |
|           | 504.22863  | 4.74        | 10.0       | C <sub>25</sub> H <sub>36</sub> O <sub>7</sub> N <sub>2</sub> Si                |

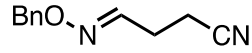

11

Sample No. : C:\Xcalibur\...0203\BG\_212115\_8\_50\_1\_pn  
 Operator name : Yamashita Nao  
 Date : 02/03/22 16:21:18  
 Instrumental method : C:\Xcalibur\methods\ESI\_100ul\S60\_100ul\_mz50\_750pn.meth  
 Instrumental Analysis Division, Global Facility Center, Creative Research Institution, Hokkaido University

Instrument : Exactive Plus

Mobile phase solvent : MeOH  
 Sample solvent : CHCl3

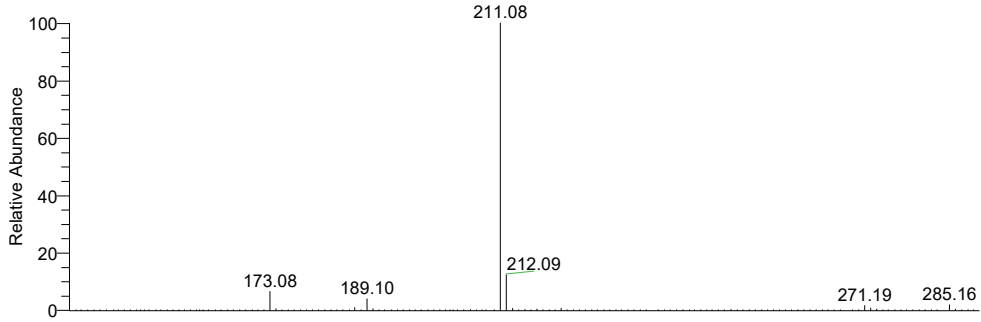

NL: 4.69E9  
 BG\_212115\_8\_50\_1\_p  
 n#21-36 RT:  
 0.29-0.49 AV: 8 T:  
 FTMS + c ESI Full ms  
 [50.00-750.00]

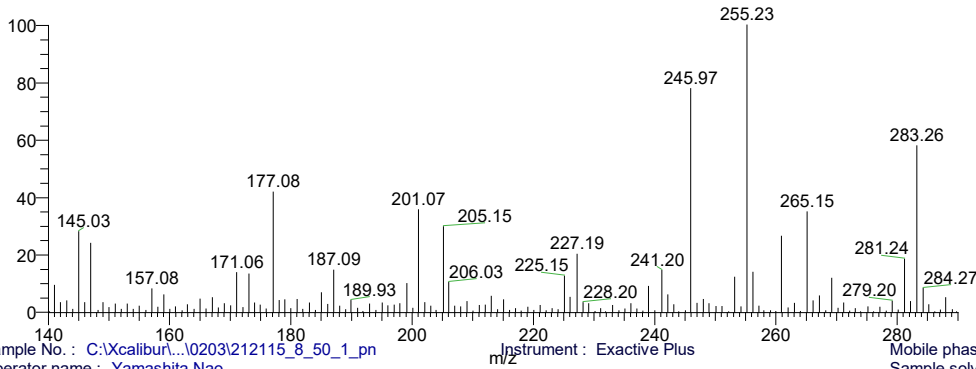

NL: 8.58E6  
 BG\_212115\_8\_50\_1\_p  
 n#21-36 RT:  
 0.31-0.51 AV: 8 T:  
 FTMS - c ESI Full ms  
 [50.00-750.00]

Sample No. : C:\Xcalibur\...0203\212115\_8\_50\_1\_pn  
 Operator name : Yamashita Nao  
 Date : 02/03/22 16:11:41

Instrumental method : C:\Xcalibur\methods\ESI\_100ul\S60\_100ul\_mz50\_750pn.meth  
 Instrumental Analysis Division, Global Facility Center, Creative Research Institution, Hokkaido University

Instrument : Exactive Plus

Mobile phase solvent : MeOH  
 Sample solvent : CHCl3

212115\_8\_50\_1\_pn#21-24 RT: 0.29-0.32 AV: 2 NL: 1.79E8  
 T: FTMS + p ESI Full ms [50.0000-750.0000]

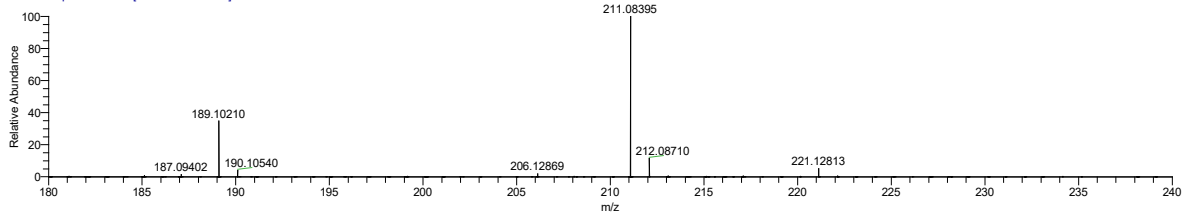

212115\_8\_50\_1\_pn#25-28 RT: 0.35-0.38 AV: 2 NL: 1.49E9  
 T: FTMS + p ESI Full ms [50.0000-750.0000]

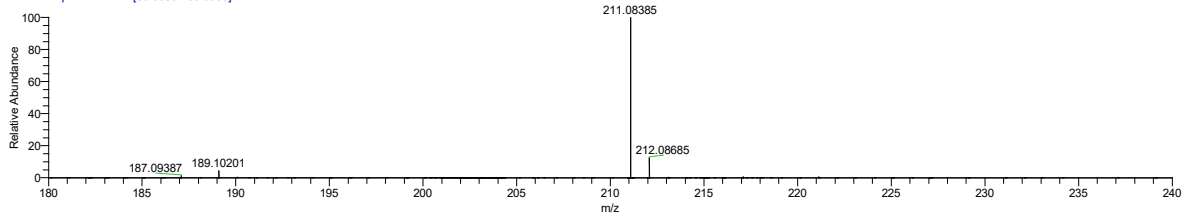

212115\_8\_50\_1\_pn#28-32 RT: 0.41-0.44 AV: 2 NL: 1.72E9  
 T: FTMS + p ESI Full ms [50.0000-750.0000]

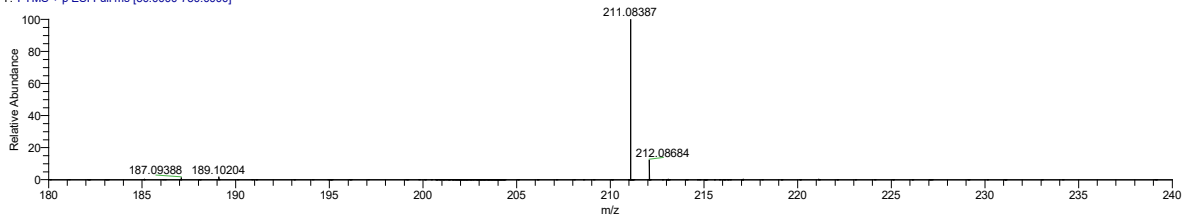

Elemental composition search on mass 211.08

m/z= 206.08-216.08

Isotope Min Max

N-14 0 10

O-16 0 10

C-12 0 100

H-1 0 200

Na-23 0 1

Charge 1

Mass tolerance 5.00 ppm

Nitrogen rule not used

RDB equiv -1.00-100.00

max results 50

| m/z       | Theo. Mass | Delta (ppm) | RDB equiv. | Composition                                        |
|-----------|------------|-------------|------------|----------------------------------------------------|
| 211.08385 | 211.08391  | -0.28       | 5.0        | C <sub>10</sub> H <sub>13</sub> O <sub>4</sub> N   |
|           | 211.08418  | -1.58       | 6.5        | C <sub>11</sub> H <sub>12</sub> ON <sub>2</sub> Na |
|           | 211.08284  | 4.78        | 7.0        | C <sub>9</sub> H <sub>10</sub> N <sub>5</sub> Na   |

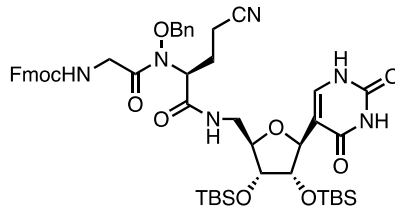

**13**

Sample No. : C:\xcalibur\...BG\_212107\_8\_38\_LP\_pn2  
 Operator name : Yamashita Nao  
 Date : 02/03/22 14:28:09  
 Instrumental method : C:\xcalibur\methods\ESI\_100ul\S60\_100ul\_mz150\_2000pn.meth

Instrument : Exactive Plus

Mobile phase solvent : MeOH  
 Sample solvent : CHCl3

Instrumental Analysis Division, Global Facility Center, Creative Research Institution, Hokkaido University

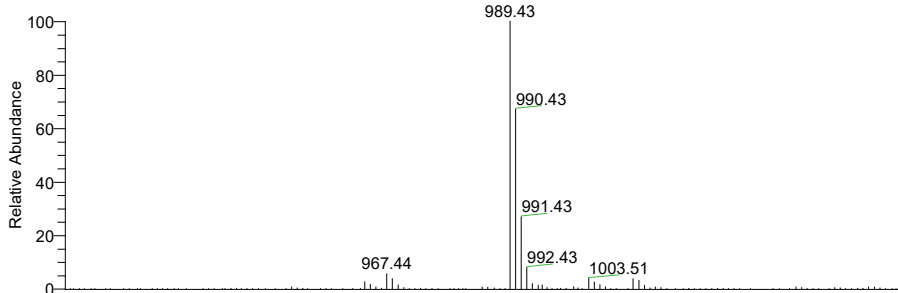

NL: 7.05E7  
 BG\_212107\_8\_38\_LP\_pn2#19-33 RT:  
 0.32-0.50 AV: 8 T:  
 FTMS + c ESI Full ms  
 [150.00-2000.00]

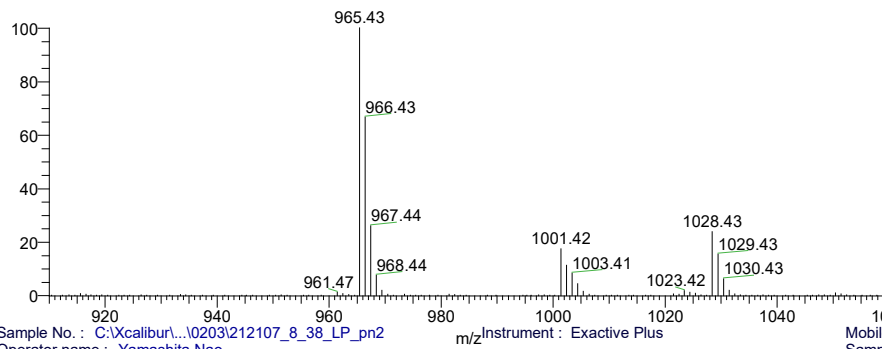

NL: 2.90E7  
 BG\_212107\_8\_38\_LP\_pn2#19-33 RT:  
 0.32-0.48 AV: 7 T:  
 FTMS - c ESI Full ms  
 [150.00-2000.00]

Sample No. : C:\xcalibur\...0203\212107\_8\_38\_LP\_pn2  
 Operator name : Yamashita Nao  
 Date : 02/03/22 14:16:05  
 Instrumental method : C:\xcalibur\methods\ESI\_100ul\S60\_100ul\_mz150\_2000pn.meth

Instrument : Exactive Plus

Mobile phase solvent : MeOH  
 Sample solvent : CHCl3

Instrumental Analysis Division, Global Facility Center, Creative Research Institution, Hokkaido University

212107\_8\_38\_LP\_pn2 #19-22 RT: 0.30-0.33 AV: 2 NL: 7.84E6  
 T: FTMS + p ESI Full ms [150.0000-2000.0000]

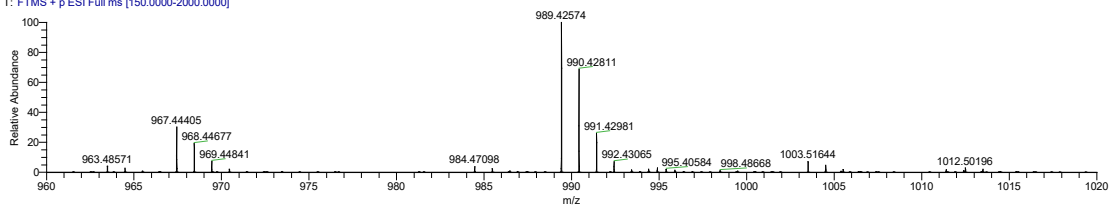

212107\_8\_38\_LP\_pn2 #22-26 RT: 0.36-0.39 AV: 2 NL: 2.25E7  
 T: FTMS + p ESI Full ms [150.0000-2000.0000]

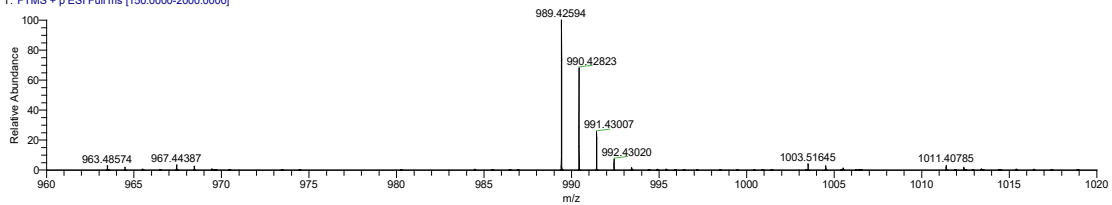

212107\_8\_38\_LP\_pn2 #26-30 RT: 0.41-0.44 AV: 2 NL: 2.22E7  
 T: FTMS + p ESI Full ms [150.0000-2000.0000]

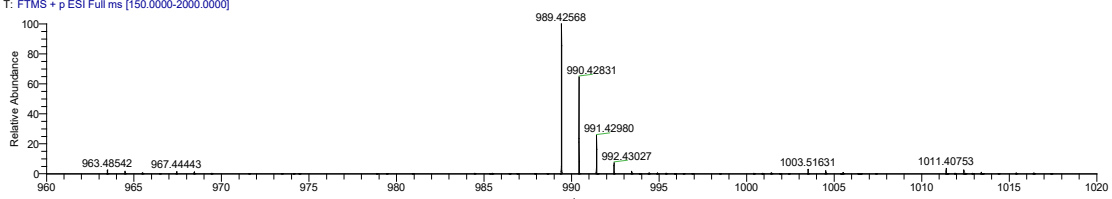



Elemental composition search on mass 989.43

m/z= 984.43-994.43

Isotope Min Max  
 N-14 0 6  
 O-16 0 10  
 C-12 0 100  
 H-1 0 200  
 Na-23 1 1  
 Si-28 0 2  
 S-32 0 0

Charge 1

Mass tolerance 5.00 ppm

Nitrogen rule not used

RDB equiv -1.00-100.00

max results 100

| m/z       | Theo. Mass | Delta (ppm) | RDB equiv. | Composition                                                                      |
|-----------|------------|-------------|------------|----------------------------------------------------------------------------------|
| 989.42594 | 989.42615  | -0.21       | 44.5       | C <sub>71</sub> H <sub>58</sub> N <sub>2</sub> NaSi                              |
|           | 989.42620  | -0.26       | 36.0       | C <sub>65</sub> H <sub>60</sub> O <sub>7</sub> NNa                               |
|           | 989.42532  | 0.63        | 27.0       | C <sub>56</sub> H <sub>64</sub> O <sub>10</sub> N <sub>3</sub> NaSi              |
|           | 989.42661  | -0.68       | 35.0       | C <sub>64</sub> H <sub>64</sub> O <sub>4</sub> NNaSi <sub>2</sub>                |
|           | 989.42527  | 0.68        | 35.5       | C <sub>62</sub> H <sub>62</sub> O <sub>3</sub> N <sub>4</sub> NaSi <sub>2</sub>  |
|           | 989.42486  | 1.09        | 36.5       | C <sub>63</sub> H <sub>58</sub> O <sub>6</sub> N <sub>4</sub> Na                 |
|           | 989.42712  | -1.19       | 22.5       | C <sub>50</sub> H <sub>66</sub> O <sub>10</sub> N <sub>6</sub> NaSi <sub>2</sub> |
|           | 989.42754  | -1.61       | 41.0       | C <sub>66</sub> H <sub>56</sub> O <sub>3</sub> N <sub>5</sub> Na                 |
|           | 989.42398  | 1.99        | 27.5       | C <sub>54</sub> H <sub>62</sub> O <sub>9</sub> N <sub>6</sub> NaSi               |
|           | 989.42795  | -2.03       | 40.0       | C <sub>65</sub> H <sub>60</sub> N <sub>5</sub> NaSi <sub>2</sub>                 |
|           | 989.42393  | 2.03        | 30.5       | C <sub>61</sub> H <sub>66</sub> O <sub>7</sub> NaSi <sub>2</sub>                 |
|           | 989.42800  | -2.08       | 31.5       | C <sub>59</sub> H <sub>62</sub> O <sub>7</sub> N <sub>4</sub> NaSi               |
|           | 989.42352  | 2.45        | 31.5       | C <sub>62</sub> H <sub>62</sub> O <sub>10</sub> Na                               |
|           | 989.42347  | 2.50        | 40.0       | C <sub>68</sub> H <sub>60</sub> O <sub>3</sub> NNaSi                             |
|           | 989.42888  | -2.97       | 40.5       | C <sub>68</sub> H <sub>58</sub> O <sub>4</sub> N <sub>2</sub> Na                 |
|           | 989.42929  | -3.38       | 39.5       | C <sub>67</sub> H <sub>62</sub> O <sub>2</sub> N <sub>2</sub> NaSi <sub>2</sub>  |
|           | 989.42259  | 3.39        | 31.0       | C <sub>59</sub> H <sub>64</sub> O <sub>6</sub> N <sub>3</sub> NaSi <sub>2</sub>  |
|           | 989.42934  | -3.44       | 31.0       | C <sub>61</sub> H <sub>64</sub> O <sub>8</sub> NNaSi                             |
|           | 989.42218  | 3.80        | 32.0       | C <sub>60</sub> H <sub>60</sub> O <sub>9</sub> N <sub>3</sub> Na                 |
|           | 989.42212  | 3.86        | 40.5       | C <sub>66</sub> H <sub>58</sub> O <sub>2</sub> N <sub>4</sub> NaSi               |
|           | 989.43022  | -4.32       | 45.5       | C <sub>69</sub> H <sub>54</sub> N <sub>6</sub> Na                                |
|           | 989.42124  | 4.75        | 31.5       | C <sub>57</sub> H <sub>62</sub> O <sub>5</sub> N <sub>6</sub> NaSi <sub>2</sub>  |

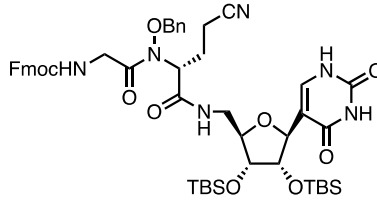

14

Sample No. : C:\Xcalibur\...BG\_212108\_8\_38\_MP\_pn2

Instrument : Exactive Plus

Mobile phase solvent : MeOH

Operator name : Yamashita Nao

Sample solvent : CHCl3

Date : 02/03/22 14:40:22

Instrumental method : C:\Xcalibur\methods\ESI\_100ul\S60\_100ul\_mz150\_2000pn.meth

Instrumental Analysis Division, Global Facility Center, Creative Research Institution, Hokkaido University

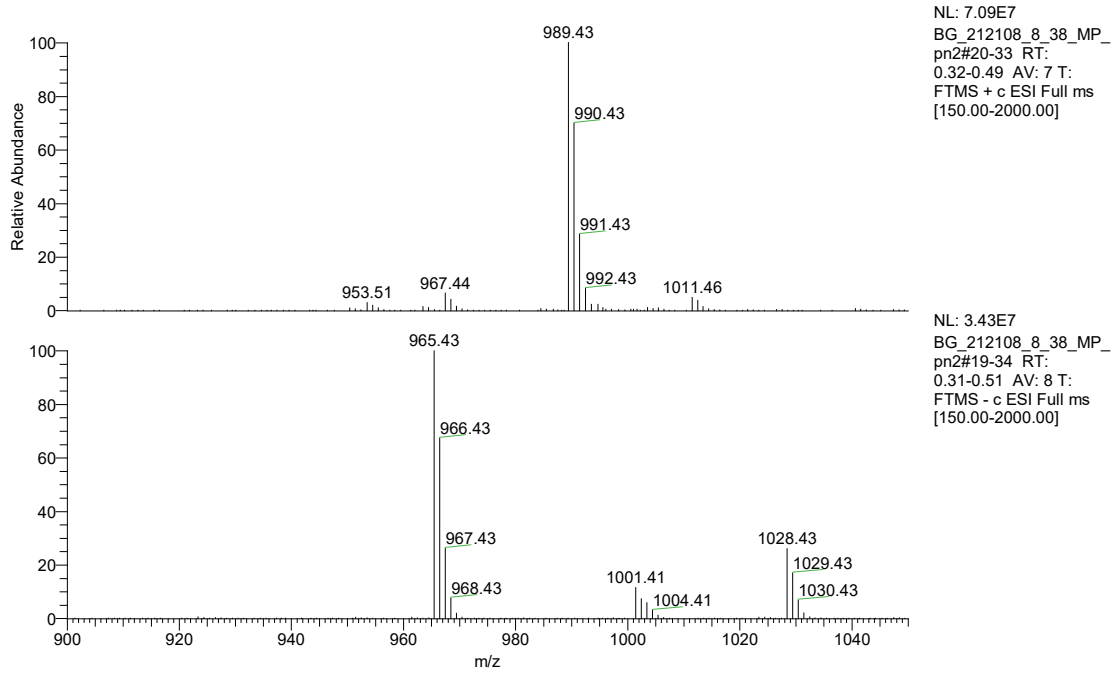

NL: 7.09E7  
BG\_212108\_8\_38\_MP\_pn2#20-33 RT: 0.32-0.49 AV: 7 T: FTMS + c ESI Full ms [150.00-2000.00]

NL: 3.43E7  
BG\_212108\_8\_38\_MP\_pn2#19-34 RT: 0.31-0.51 AV: 8 T: FTMS - c ESI Full ms [150.00-2000.00]

Sample No. : C:\Xcalibur\...0203\212108\_8\_38\_MP\_pn2

Instrument : Exactive Plus

Mobile phase solvent : MeOH

Operator name : Yamashita Nao

Sample solvent : CHCl3

Date : 02/03/22 14:30:23

Instrumental method : C:\Xcalibur\methods\ESI\_100ul\S60\_100ul\_mz150\_2000pn.meth

Instrumental Analysis Division, Global Facility Center, Creative Research Institution, Hokkaido University

212108\_8\_38\_MP\_pn2 #19-23 RT: 0.29-0.35 AV: 3 NL: 7.28E6  
T: FTMS + p ESI Full ms [150.0000-2000.0000]

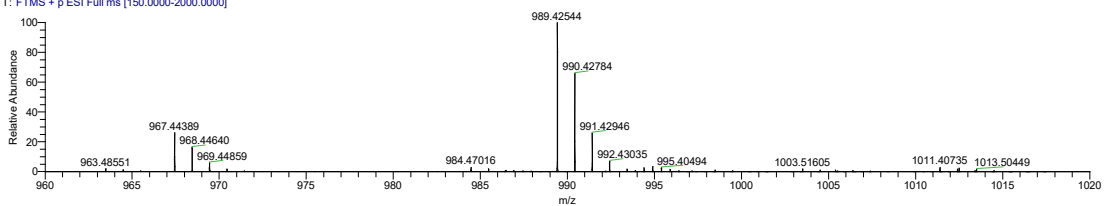

212108\_8\_38\_MP\_pn2 #23-27 RT: 0.35-0.41 AV: 3 NL: 2.14E7  
T: FTMS + p ESI Full ms [150.0000-2000.0000]

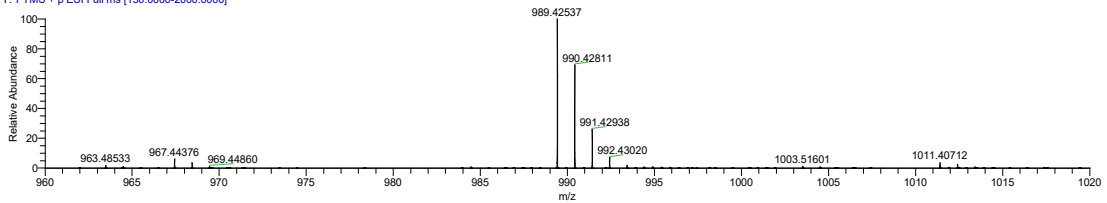

212108\_8\_38\_MP\_pn2 #27-30 RT: 0.41-0.43 AV: 2 NL: 2.70E7  
T: FTMS + p ESI Full ms [150.0000-2000.0000]

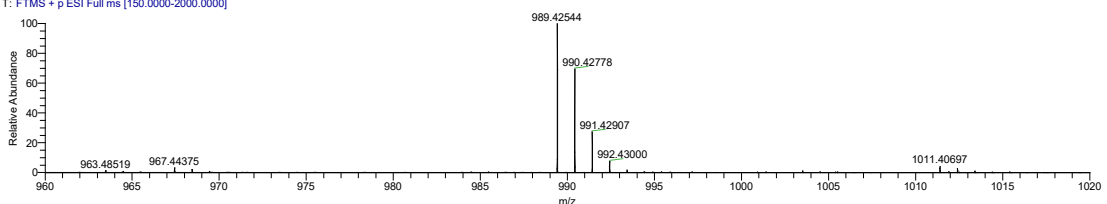

Elemental composition search on mass 989.43

m/z= 984.43-994.43

Isotope Min Max  
 N-14 0 6  
 O-16 0 10  
 C-12 0 100  
 H-1 0 200  
 Na-23 1 1  
 Si-28 0 2  
 S-32 0 0

Charge 1  
 Mass tolerance 5.00 ppm  
 Nitrogen rule not used  
 RDB equiv -1.00-100.00  
 max results 100

| m/z       | Theo. Mass | Delta (ppm) | RDB equiv. | Composition                                                                      |
|-----------|------------|-------------|------------|----------------------------------------------------------------------------------|
| 989.42537 | 989.42532  | 0.05        | 27.0       | C <sub>56</sub> H <sub>64</sub> O <sub>10</sub> N <sub>3</sub> NaSi              |
|           | 989.42527  | 0.11        | 35.5       | C <sub>62</sub> H <sub>62</sub> O <sub>3</sub> N <sub>4</sub> NaSi <sub>2</sub>  |
|           | 989.42486  | 0.52        | 36.5       | C <sub>63</sub> H <sub>58</sub> O <sub>6</sub> N <sub>4</sub> Na                 |
|           | 989.42615  | -0.79       | 44.5       | C <sub>71</sub> H <sub>58</sub> N <sub>2</sub> NaSi                              |
|           | 989.42620  | -0.84       | 36.0       | C <sub>65</sub> H <sub>60</sub> O <sub>7</sub> NNa                               |
|           | 989.42661  | -1.25       | 35.0       | C <sub>64</sub> H <sub>64</sub> O <sub>4</sub> NNaSi <sub>2</sub>                |
|           | 989.42398  | 1.41        | 27.5       | C <sub>54</sub> H <sub>62</sub> O <sub>9</sub> N <sub>6</sub> NaSi               |
|           | 989.42393  | 1.46        | 30.5       | C <sub>61</sub> H <sub>66</sub> O <sub>7</sub> NaSi <sub>2</sub>                 |
|           | 989.42712  | -1.76       | 22.5       | C <sub>50</sub> H <sub>66</sub> O <sub>10</sub> N <sub>6</sub> NaSi <sub>2</sub> |
|           | 989.42352  | 1.87        | 31.5       | C <sub>62</sub> H <sub>62</sub> O <sub>10</sub> Na                               |
|           | 989.42347  | 1.92        | 40.0       | C <sub>68</sub> H <sub>60</sub> O <sub>3</sub> NNaSi                             |
|           | 989.42754  | -2.19       | 41.0       | C <sub>66</sub> H <sub>56</sub> O <sub>3</sub> N <sub>5</sub> Na                 |
|           | 989.42795  | -2.60       | 40.0       | C <sub>65</sub> H <sub>60</sub> N <sub>5</sub> NaSi <sub>2</sub>                 |
|           | 989.42800  | -2.66       | 31.5       | C <sub>59</sub> H <sub>62</sub> O <sub>7</sub> N <sub>4</sub> NaSi               |
|           | 989.42259  | 2.81        | 31.0       | C <sub>59</sub> H <sub>64</sub> O <sub>6</sub> N <sub>3</sub> NaSi <sub>2</sub>  |
|           | 989.42218  | 3.23        | 32.0       | C <sub>60</sub> H <sub>60</sub> O <sub>9</sub> N <sub>3</sub> Na                 |
|           | 989.42212  | 3.28        | 40.5       | C <sub>66</sub> H <sub>58</sub> O <sub>2</sub> N <sub>4</sub> NaSi               |
|           | 989.42888  | -3.55       | 40.5       | C <sub>68</sub> H <sub>58</sub> O <sub>4</sub> N <sub>2</sub> Na                 |
|           | 989.42929  | -3.96       | 39.5       | C <sub>67</sub> H <sub>62</sub> O <sub>2</sub> N <sub>2</sub> NaSi <sub>2</sub>  |
|           | 989.42934  | -4.01       | 31.0       | C <sub>61</sub> H <sub>64</sub> O <sub>8</sub> NNaSi                             |
|           | 989.42124  | 4.17        | 31.5       | C <sub>57</sub> H <sub>62</sub> O <sub>5</sub> N <sub>6</sub> NaSi <sub>2</sub>  |
|           | 989.42083  | 4.58        | 32.5       | C <sub>58</sub> H <sub>58</sub> O <sub>8</sub> N <sub>6</sub> Na                 |

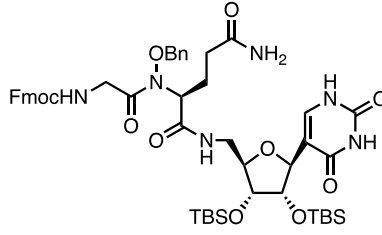

**15**

Sample No. : C:\Xcalibur\...BG\_212109\_7\_91\_LP\_pn3  
 Operator name : Yamashita Nao  
 Date : 02/04/22 16:29:45  
 Instrumental method : C:\Xcalibur\methods\ESI\_100ul\S60\_100ul\_mz150\_2000pn.meth  
 Instrumental Analysis Division, Global Facility Center, Creative Research Institution, Hokkaido University

Mobile phase solvent : MeOH  
 Sample solvent : CHCl3

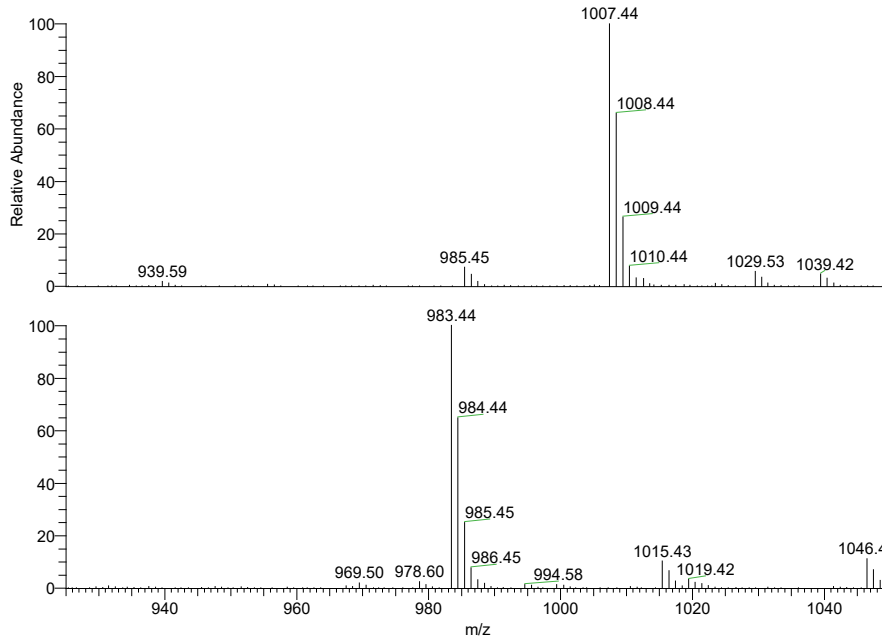

NL: 2.90E7  
 BG\_212109\_7\_91\_LP\_pn3#19-32 RT: 0.30-0.48 AV: 7 T: FTMS + c ESI Full ms [150.00-2000.00]

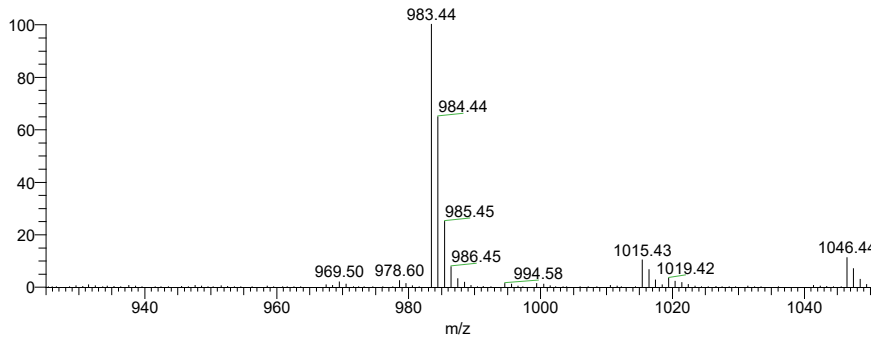

NL: 5.41E6  
 BG\_212109\_7\_91\_LP\_pn3#19-33 RT: 0.32-0.49 AV: 7 T: FTMS - c ESI Full ms [150.00-2000.00]

Sample No. : C:\Xcalibur\...0204\212109\_7\_91\_LP\_pn3  
 Operator name : Yamashita Nao  
 Date : 02/04/22 16:25:59  
 Instrumental method : C:\Xcalibur\methods\ESI\_100ul\S60\_100ul\_mz150\_2000pn.meth  
 Instrumental Analysis Division, Global Facility Center, Creative Research Institution, Hokkaido University

Instrument : Exactive Plus

Mobile phase solvent : MeOH  
 Sample solvent : CHCl3

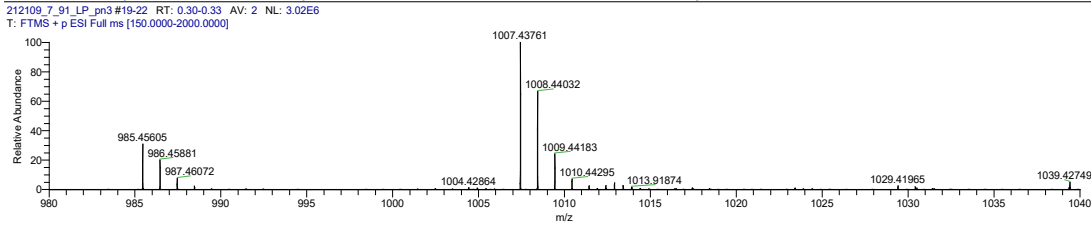

212109\_7\_91\_LP\_pn3 #22-26 RT: 0.36-0.39 AV: 2 NL: 1.05E7  
 T: FTMS + p ESI Full ms [150.0000-2000.0000]

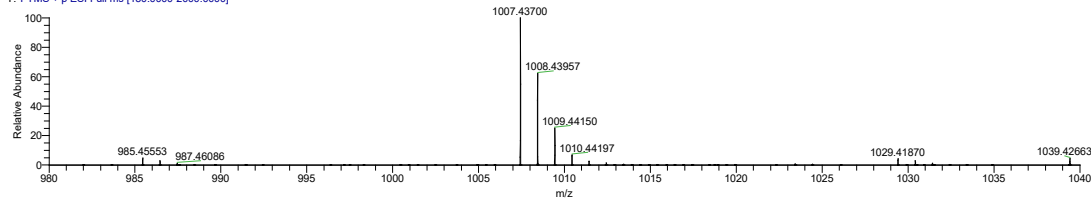

212109\_7\_91\_LP\_pn3 #26-29 RT: 0.42-0.45 AV: 2 NL: 9.26E6  
 T: FTMS + p ESI Full ms [150.0000-2000.0000]

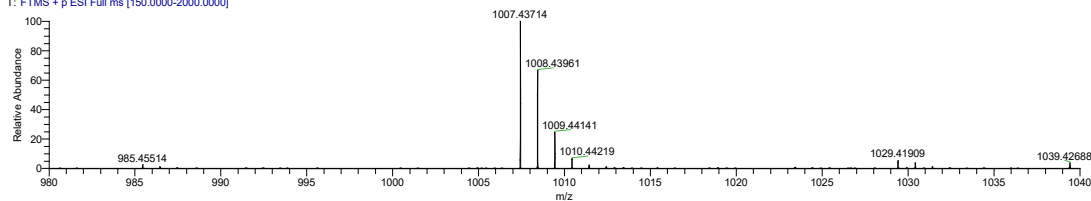

Elemental composition search on mass 1007.44

m/z= 1002.44-1012.44

Isotope Min Max  
 O-16 10 15  
 C-12 0 100  
 H-1 0 200  
 Na-23 0 1  
 Si-28 2 2  
 N-14 5 10

Charge 1

Mass tolerance 5.00 ppm

Nitrogen rule not used

RDB equiv -1.00-100.00

max results 10

| m/z        | Theo. Mass | Delta (ppm) | RDB equiv. | Composition                                                                      |
|------------|------------|-------------|------------|----------------------------------------------------------------------------------|
| 1007.43700 | 1007.43741 | -0.40       | 20.0       | C <sub>49</sub> H <sub>69</sub> O <sub>14</sub> N <sub>5</sub> Si <sub>2</sub>   |
|            | 1007.43634 | 0.66        | 22.0       | C <sub>48</sub> H <sub>66</sub> O <sub>10</sub> N <sub>9</sub> NaSi <sub>2</sub> |
|            | 1007.43768 | -0.68       | 21.5       | <u>C<sub>50</sub>H<sub>68</sub>O<sub>11</sub>N<sub>6</sub>NaSi<sub>2</sub></u>   |
|            | 1007.43606 | 0.93        | 20.5       | C <sub>47</sub> H <sub>67</sub> O <sub>13</sub> N <sub>8</sub> Si <sub>2</sub>   |
|            | 1007.43874 | -1.73       | 25.0       | C <sub>50</sub> H <sub>65</sub> O <sub>10</sub> N <sub>9</sub> Si <sub>2</sub>   |
|            | 1007.43500 | 1.98        | 17.0       | C <sub>47</sub> H <sub>70</sub> O <sub>14</sub> N <sub>5</sub> NaSi <sub>2</sub> |
|            | 1007.44009 | -3.06       | 24.5       | C <sub>52</sub> H <sub>67</sub> O <sub>11</sub> N <sub>6</sub> Si <sub>2</sub>   |
|            | 1007.43366 | 3.32        | 17.5       | C <sub>45</sub> H <sub>68</sub> O <sub>13</sub> N <sub>8</sub> NaSi <sub>2</sub> |
|            | 1007.43204 | 4.92        | 16.5       | C <sub>42</sub> H <sub>67</sub> O <sub>15</sub> N <sub>10</sub> Si <sub>2</sub>  |

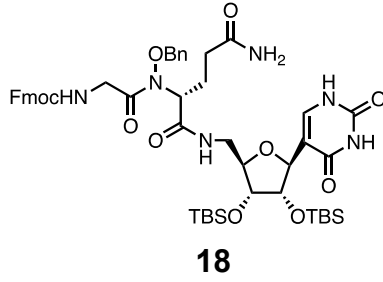

Sample No. : C:\Xcalibur\...BG\_212110\_7\_29\_M \_  
 Operator name : Yamashita Nao  
 Date : 02/03/22 15:14:00  
 Instrumental method : C:\Xcalibur\methods\ESI\_100ul\S60\_100ul\_mz150\_2000pn.meth  
 Instrumental Analysis Division, Global Facility Center, Creative Research Institution, Hokkaido University

Instrument : Exactive Plus  
 Mobile phase solvent : MeOH  
 Sample solvent : CHCl3

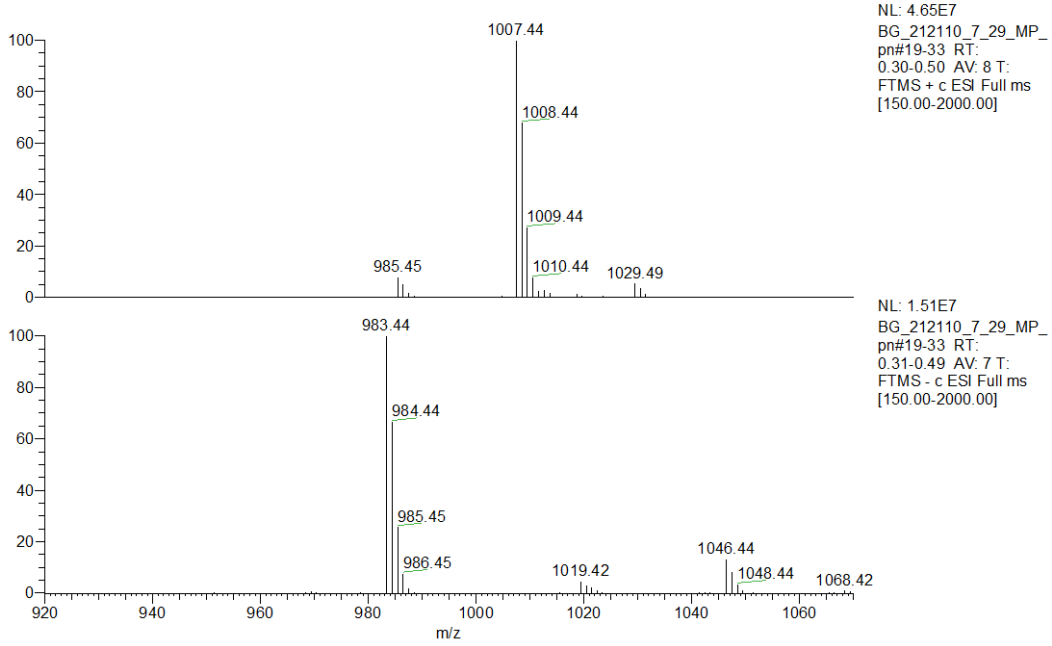

Sample No. : C:\Xcalibur\...0203\212110\_7\_29\_MP\_pn  
 Operator name : Yamashita Nao  
 Date : 02/03/22 15:11:54  
 Instrumental method : C:\Xcalibur\methods\ESI\_100ul\S60\_100ul\_mz150\_2000pn.meth  
 Instrumental Analysis Division, Global Facility Center, Creative Research Institution, Hokkaido University

Instrument : Exactive Plus  
 Mobile phase solvent : MeOH  
 Sample solvent : CHCl3

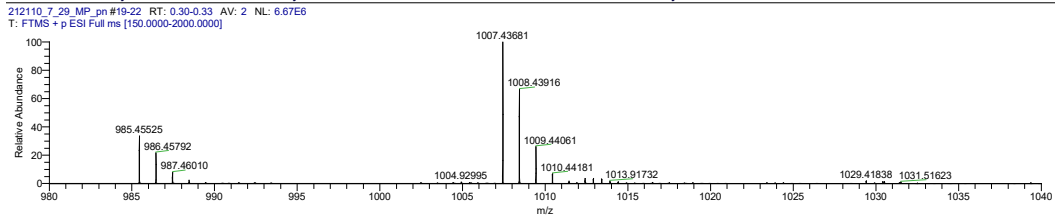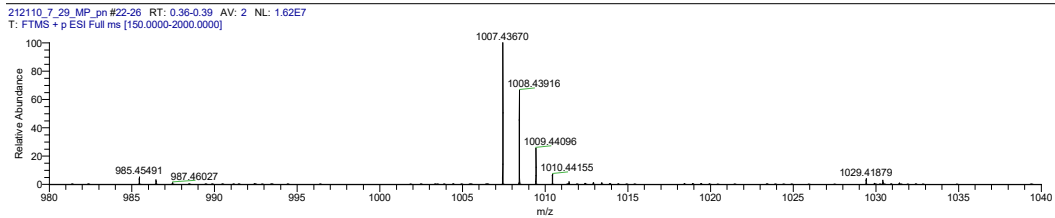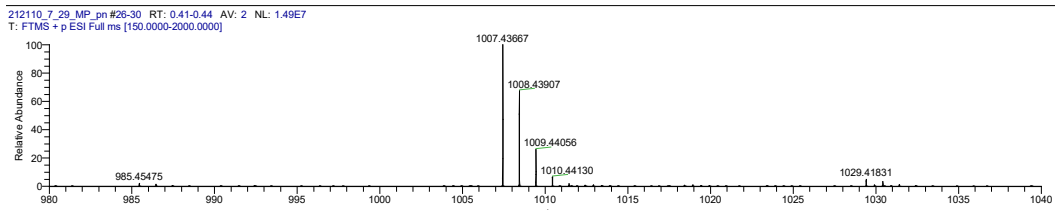

Elemental composition search on mass 1007.44

m/z= 1002.44-1012.44

Isotope Min Max  
 N-14 2 6  
 O-16 0 11  
 C-12 0 100  
 H-1 0 200  
 Na-23 1 1  
 Si-28 0 2  
 S-32 0 0

Charge 1  
 Mass tolerance 5.00 ppm  
 Nitrogen rule not used  
 RDB equiv -1.00-100.00  
 max results 100

| m/z        | Theo. Mass | Delta (ppm) | RDB equiv. | Composition                                                                      |
|------------|------------|-------------|------------|----------------------------------------------------------------------------------|
| 1007.43670 | 1007.43671 | -0.01       | 43.5       | C <sub>71</sub> H <sub>60</sub> O <sub>N</sub> <sub>2</sub> NaSi                 |
|            | 1007.43588 | 0.81        | 26.0       | C <sub>56</sub> H <sub>66</sub> O <sub>11</sub> N <sub>3</sub> NaSi              |
|            | 1007.43583 | 0.86        | 34.5       | C <sub>62</sub> H <sub>64</sub> O <sub>4</sub> N <sub>4</sub> NaSi <sub>2</sub>  |
|            | 1007.43768 | -0.97       | 21.5       | C <sub>50</sub> H <sub>68</sub> O <sub>11</sub> N <sub>6</sub> NaSi <sub>2</sub> |
|            | 1007.43542 | 1.27        | 35.5       | C <sub>63</sub> H <sub>60</sub> O <sub>7</sub> N <sub>4</sub> Na                 |
|            | 1007.43537 | 1.32        | 44.0       | C <sub>69</sub> H <sub>58</sub> N <sub>5</sub> NaSi                              |
|            | 1007.43810 | -1.39       | 40.0       | C <sub>66</sub> H <sub>58</sub> O <sub>4</sub> N <sub>5</sub> Na                 |
|            | 1007.43851 | -1.80       | 39.0       | C <sub>65</sub> H <sub>62</sub> O <sub>N</sub> <sub>5</sub> NaSi <sub>2</sub>    |
|            | 1007.43856 | -1.85       | 30.5       | C <sub>59</sub> H <sub>64</sub> O <sub>8</sub> N <sub>4</sub> NaSi               |
|            | 1007.43454 | 2.14        | 26.5       | C <sub>54</sub> H <sub>64</sub> O <sub>10</sub> N <sub>6</sub> NaSi              |
|            | 1007.43944 | -2.72       | 39.5       | C <sub>68</sub> H <sub>60</sub> O <sub>5</sub> N <sub>2</sub> Na                 |
|            | 1007.43357 | 3.11        | 48.5       | C <sub>75</sub> H <sub>56</sub> N <sub>2</sub> Na                                |
|            | 1007.43985 | -3.13       | 38.5       | C <sub>67</sub> H <sub>64</sub> O <sub>2</sub> N <sub>2</sub> NaSi <sub>2</sub>  |
|            | 1007.43315 | 3.52        | 30.0       | C <sub>59</sub> H <sub>66</sub> O <sub>7</sub> N <sub>3</sub> NaSi <sub>2</sub>  |
|            | 1007.43274 | 3.93        | 31.0       | C <sub>60</sub> H <sub>62</sub> O <sub>10</sub> N <sub>3</sub> Na                |
|            | 1007.43269 | 3.98        | 39.5       | C <sub>66</sub> H <sub>60</sub> O <sub>3</sub> N <sub>4</sub> NaSi               |
|            | 1007.44078 | -4.05       | 44.5       | C <sub>69</sub> H <sub>56</sub> O <sub>N</sub> <sub>6</sub> Na                   |
|            | 1007.44124 | -4.51       | 35.0       | C <sub>62</sub> H <sub>62</sub> O <sub>5</sub> N <sub>5</sub> NaSi               |
|            | 1007.43181 | 4.86        | 30.5       | C <sub>57</sub> H <sub>64</sub> O <sub>6</sub> N <sub>6</sub> NaSi <sub>2</sub>  |
|            | 1007.44170 | -4.97       | 25.5       | C <sub>55</sub> H <sub>68</sub> O <sub>9</sub> N <sub>4</sub> NaSi <sub>2</sub>  |

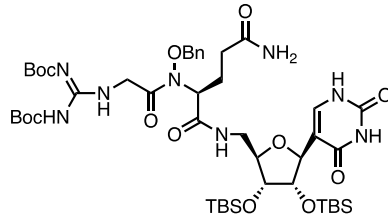

17

Sample No. : C:\xcalibur\...BG\_212111\_7\_93\_LP\_pn  
 Operator name : Yamashita Nao  
 Date : 02/03/22 15:23:54  
 Instrumental method : C:\xcalibur\methods\ESI\_100ul\S60\_100ul\_mz200\_3000pn.meth  
 Instrumental Analysis Division, Global Facility Center, Creative Research Institution, Hokkaido University

Instrument : Exactive Plus

Mobile phase solvent : MeOH  
 Sample solvent : CHCl3

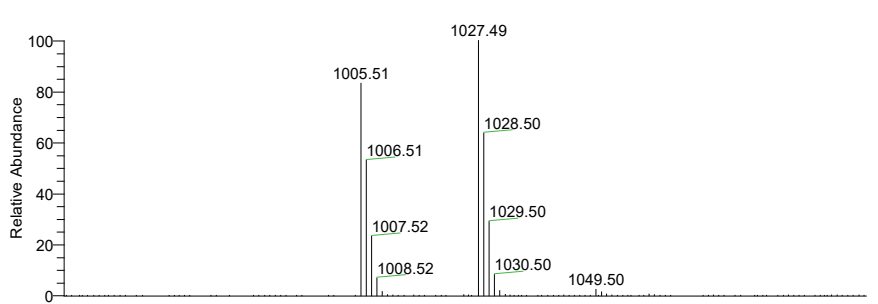

NL: 2.83E8  
 BG\_212111\_7\_93\_LP\_pn#19-33 RT: 0.32-0.50 AV: 8 T: FTMS + c ESI Full ms [200.00-3000.00]

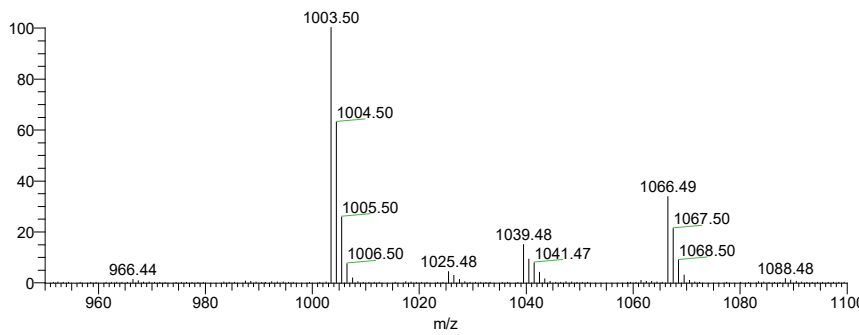

NL: 5.87E7  
 BG\_212111\_7\_93\_LP\_pn#19-33 RT: 0.32-0.49 AV: 7 T: FTMS - c ESI Full ms [200.00-3000.00]

Sample No. : C:\xcalibur\...0203\212111\_7\_93\_LP\_pn  
 Operator name : Yamashita Nao  
 Date : 02/03/22 15:17:00  
 Instrumental method : C:\xcalibur\methods\ESI\_100ul\S60\_100ul\_mz200\_3000pn.meth  
 Instrumental Analysis Division, Global Facility Center, Creative Research Institution, Hokkaido University

Instrument : Exactive Plus

Mobile phase solvent : MeOH  
 Sample solvent : CHCl3

212111\_7\_93\_LP\_pn#19-24 RT: 0.30-0.36 AV: 3 NL: 8.10E7  
 T: FTMS + p ESI Full ms [200.0000-3000.0000]

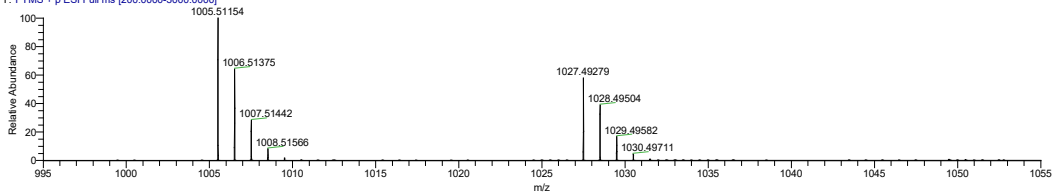

212111\_7\_93\_LP\_pn#24-29 RT: 0.39-0.44 AV: 3 NL: 1.02E8  
 T: FTMS + p ESI Full ms [200.0000-3000.0000]

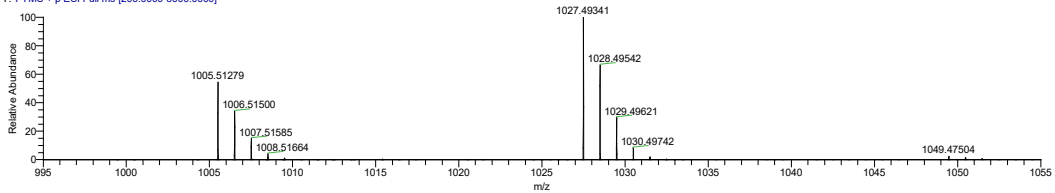

212111\_7\_93\_LP\_pn#29-33 RT: 0.44-0.50 AV: 3 NL: 6.14E7  
 T: FTMS + p ESI Full ms [200.0000-3000.0000]

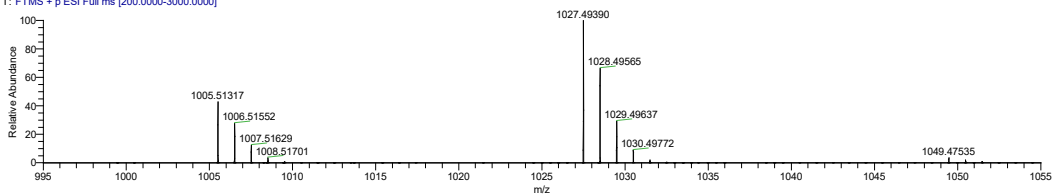



Elemental composition search on mass 1027.49

m/z= 1022.49-1032.49

Isotope Min Max  
 N-14 0 10  
 O-16 5 15  
 C-12 0 100  
 H-1 0 200  
 Si-28 2 2  
 Na-23 1 1

Charge 1

Mass tolerance 5.00 ppm

Nitrogen rule not used

RDB equiv -1.00-100.00

max results 50

| m/z        | Theo. Mass | Delta (ppm) | RDB equiv. | Composition                                                                       |
|------------|------------|-------------|------------|-----------------------------------------------------------------------------------|
| 1027.49341 | 1027.49307 | 0.33        | 22.5       | C <sub>57</sub> H <sub>76</sub> O <sub>10</sub> N <sub>2</sub> NaSi <sub>2</sub>  |
|            | 1027.49307 | 0.34        | 28.0       | C <sub>56</sub> H <sub>70</sub> O <sub>5</sub> N <sub>9</sub> NaSi <sub>2</sub>   |
|            | 1027.49441 | -0.97       | 27.5       | C <sub>58</sub> H <sub>72</sub> O <sub>6</sub> N <sub>6</sub> NaSi <sub>2</sub>   |
|            | 1027.49224 | 1.14        | 10.5       | C <sub>41</sub> H <sub>76</sub> O <sub>15</sub> N <sub>10</sub> NaSi <sub>2</sub> |
|            | 1027.49173 | 1.64        | 23.0       | C <sub>55</sub> H <sub>74</sub> O <sub>9</sub> N <sub>5</sub> NaSi <sub>2</sub>   |
|            | 1027.49575 | -2.28       | 27.0       | C <sub>60</sub> H <sub>74</sub> O <sub>7</sub> N <sub>3</sub> NaSi <sub>2</sub>   |
|            | 1027.49626 | -2.77       | 14.5       | C <sub>46</sub> H <sub>76</sub> O <sub>13</sub> N <sub>8</sub> NaSi <sub>2</sub>  |
|            | 1027.49039 | 2.94        | 18.0       | C <sub>54</sub> H <sub>78</sub> O <sub>13</sub> N <sub>8</sub> NaSi <sub>2</sub>  |
|            | 1027.49039 | 2.94        | 23.5       | C <sub>53</sub> H <sub>72</sub> O <sub>8</sub> N <sub>8</sub> NaSi <sub>2</sub>   |
|            | 1027.49709 | -3.58       | 26.5       | C <sub>62</sub> H <sub>76</sub> O <sub>8</sub> NaSi <sub>2</sub>                  |
|            | 1027.49760 | -4.08       | 14.0       | C <sub>48</sub> H <sub>78</sub> O <sub>14</sub> N <sub>5</sub> NaSi <sub>2</sub>  |
|            | 1027.48905 | 4.25        | 18.5       | C <sub>52</sub> H <sub>76</sub> O <sub>12</sub> N <sub>4</sub> NaSi <sub>2</sub>  |

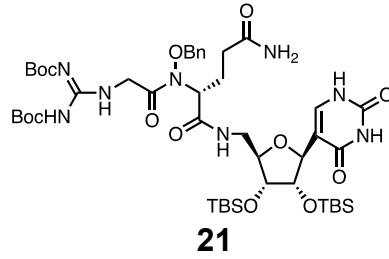

Sample No. : C:\xcalibur\...BG\_212112\_7\_94\_MP\_pn  
 Operator name : Yamashita Nao  
 Date : 02/03/22 15:37:55  
 Instrumental method : C:\xcalibur\methods\ESI\_100ul\560\_100ul\_mz200\_3000pn.meth  
 Instrumental Analysis Division, Global Facility Center, Creative Research Institution, Hokkaido University

Instrument : Exactive Plus

Mobile phase solvent : MeOH  
 Sample solvent : CHCl3

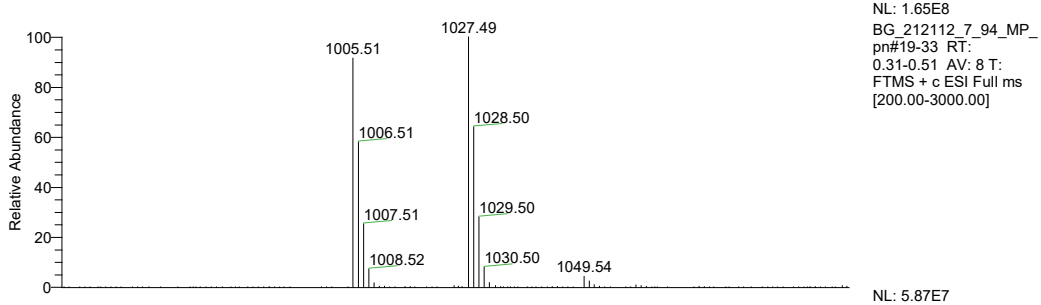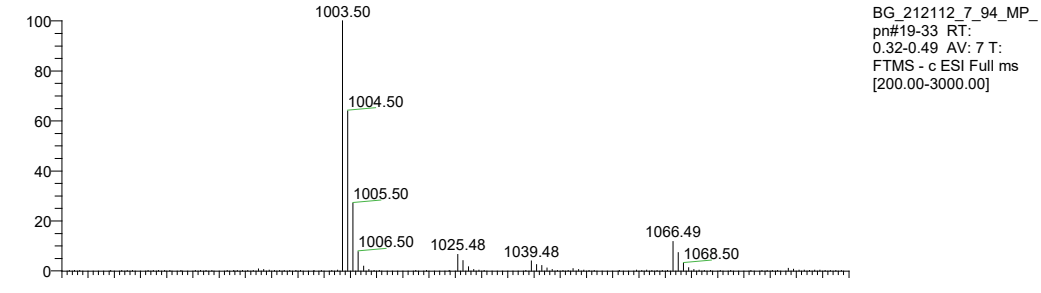

Sample No. : C:\xcalibur\...0203212112\_7\_94\_MP\_pn  
 Operator name : Yamashita Nao  
 Date : 02/03/22 15:21:46  
 Instrumental method : C:\xcalibur\methods\ESI\_100ul\560\_100ul\_mz200\_3000pn.meth  
 Instrumental Analysis Division, Global Facility Center, Creative Research Institution, Hokkaido University

Instrument : Exactive Plus

Mobile phase solvent : MeOH  
 Sample solvent : CHCl3

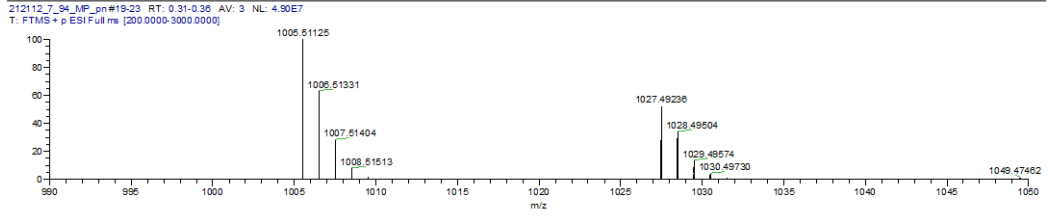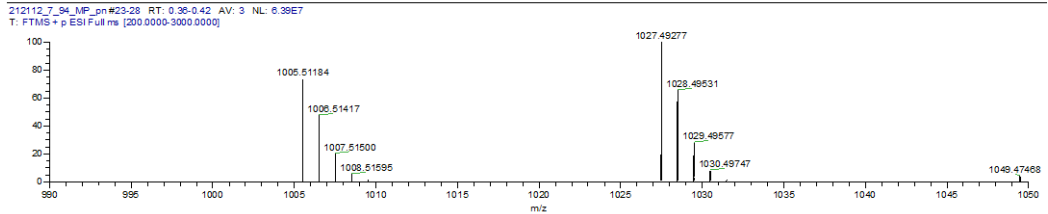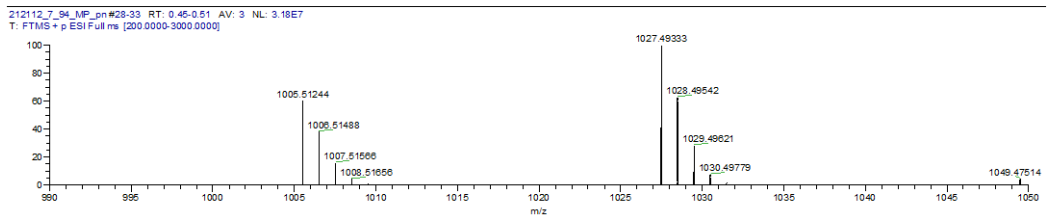

Elemental composition search on mass 1027.49

m/z= 1022.49-1032.49

Isotope Min Max  
 N-14 0 10  
 O-16 5 15  
 C-12 0 100  
 H-1 0 200  
 Si-28 2 2  
 Na-23 1 1

Charge 1  
 Mass tolerance 5.00 ppm  
 Nitrogen rule not used  
 RDB equiv -1.00-100.00  
 max results 50

| m/z        | Theo. Mass | Delta (ppm) | RDB equiv. | Composition                                                                       |
|------------|------------|-------------|------------|-----------------------------------------------------------------------------------|
| 1027.49277 | 1027.49307 | -0.29       | 28.0       | C <sub>56</sub> H <sub>70</sub> O <sub>5</sub> N <sub>9</sub> NaSi <sub>2</sub>   |
|            | 1027.49307 | -0.29       | 22.5       | C <sub>57</sub> H <sub>76</sub> O <sub>10</sub> N <sub>2</sub> NaSi <sub>2</sub>  |
|            | 1027.49224 | 0.52        | 10.5       | C <sub>41</sub> H <sub>76</sub> O <sub>15</sub> N <sub>10</sub> NaSi <sub>2</sub> |
|            | 1027.49173 | 1.01        | 23.0       | C <sub>55</sub> H <sub>74</sub> O <sub>9</sub> N <sub>5</sub> NaSi <sub>2</sub>   |
|            | 1027.49441 | -1.59       | 27.5       | C <sub>58</sub> H <sub>72</sub> O <sub>6</sub> N <sub>6</sub> NaSi <sub>2</sub>   |
|            | 1027.49039 | 2.32        | 18.0       | C <sub>54</sub> H <sub>78</sub> O <sub>13</sub> NNaSi <sub>2</sub>                |
|            | 1027.49039 | 2.32        | 23.5       | C <sub>53</sub> H <sub>72</sub> O <sub>8</sub> N <sub>8</sub> NaSi <sub>2</sub>   |
|            | 1027.49575 | -2.90       | 27.0       | C <sub>60</sub> H <sub>74</sub> O <sub>7</sub> N <sub>3</sub> NaSi <sub>2</sub>   |
|            | 1027.49626 | -3.40       | 14.5       | C <sub>46</sub> H <sub>76</sub> O <sub>13</sub> N <sub>8</sub> NaSi <sub>2</sub>  |
|            | 1027.48905 | 3.62        | 18.5       | C <sub>52</sub> H <sub>76</sub> O <sub>12</sub> N <sub>4</sub> NaSi <sub>2</sub>  |
|            | 1027.49709 | -4.21       | 26.5       | C <sub>62</sub> H <sub>76</sub> O <sub>8</sub> NaSi <sub>2</sub>                  |
|            | 1027.49760 | -4.70       | 14.0       | C <sub>48</sub> H <sub>78</sub> O <sub>14</sub> N <sub>5</sub> NaSi <sub>2</sub>  |
|            | 1027.48771 | 4.93        | 19.0       | C <sub>50</sub> H <sub>74</sub> O <sub>11</sub> N <sub>7</sub> NaSi <sub>2</sub>  |

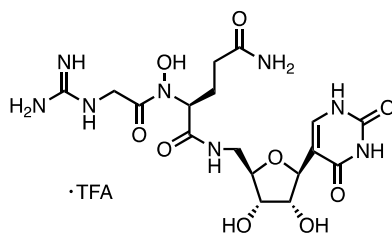

1

Sample No. : C:\Xcalibur\...BG\_212113\_8\_60\_LP\_pn  
Operator name : Yamashita Nao  
Date : 02/03/22 16:03:40

Instrument : Exactive Plus

Mobile phase solvent : MeOH  
Sample solvent : MeOH

Instrumental method : C:\Xcalibur\methods\ESI\_100u\S60\_100ul\_mz150\_2000pn.meth  
Instrumental Analysis Division, Global Facility Center, Creative Research Institution, Hokkaido University

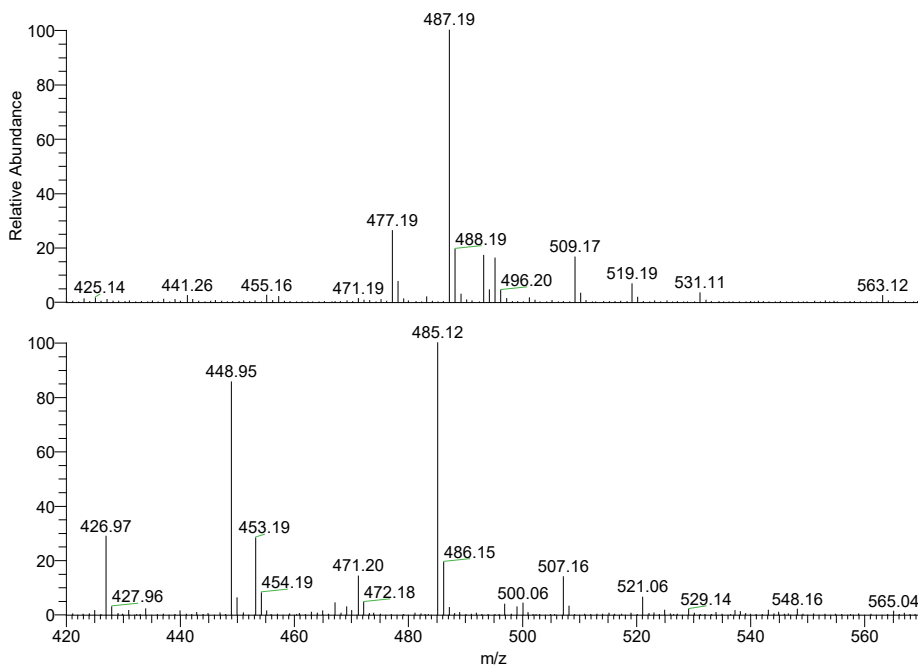

NL: 3.87E7  
BG\_212113\_8\_60\_LP\_pn#19-33 RT: 0.30-0.50 AV: 8 T: FTMS + c ESI Full ms [150.00-2000.00]

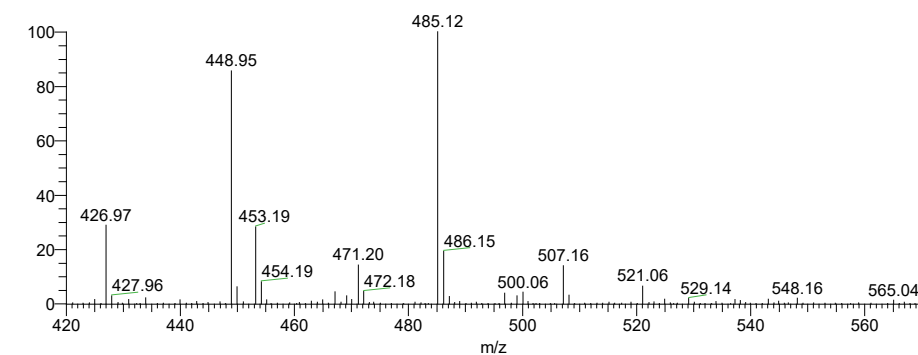

NL: 6.05E6  
BG\_212113\_8\_60\_LP\_pn#19-33 RT: 0.31-0.48 AV: 7 T: FTMS - c ESI Full ms [150.00-2000.00]

Sample No. : C:\Xcalibur\...0203212113\_8\_60\_LP\_pn  
Operator name : Yamashita Nao  
Date : 02/03/22 15:57:48

Instrument : Exactive Plus

Mobile phase solvent : MeOH  
Sample solvent : MeOH

Instrumental method : C:\Xcalibur\methods\ESI\_100u\S60\_100ul\_mz150\_2000pn.meth  
Instrumental Analysis Division, Global Facility Center, Creative Research Institution, Hokkaido University

212113\_8\_60\_LP\_pn#19-23 RT: 0.30-0.36 AV: 3 NL: 7.24E6  
T: FTMS + p ESI Full ms [150.0000-2000.0000]

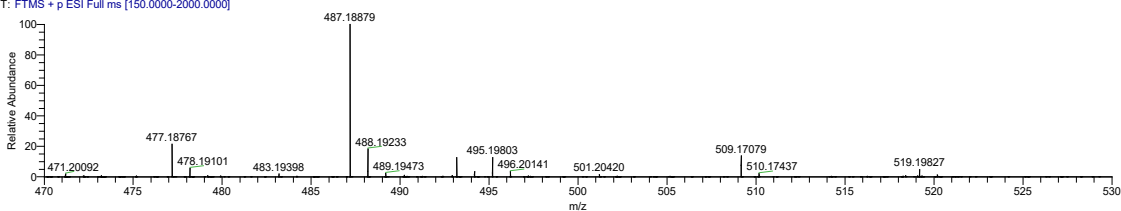

212113\_8\_60\_LP\_pn#23-26 RT: 0.36-0.38 AV: 2 NL: 1.30E7  
T: FTMS + p ESI Full ms [150.0000-2000.0000]

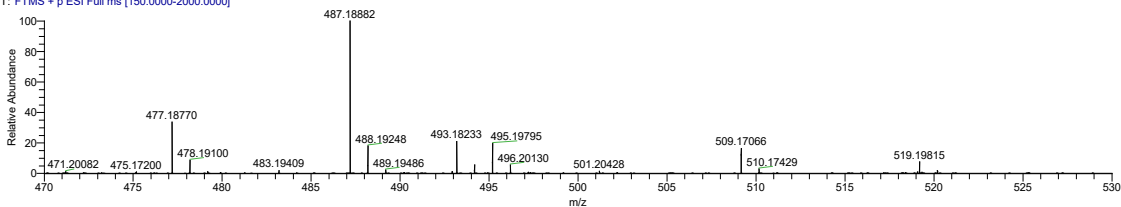

212113\_8\_60\_LP\_pn#26-30 RT: 0.41-0.44 AV: 2 NL: 1.09E7  
T: FTMS + p ESI Full ms [150.0000-2000.0000]

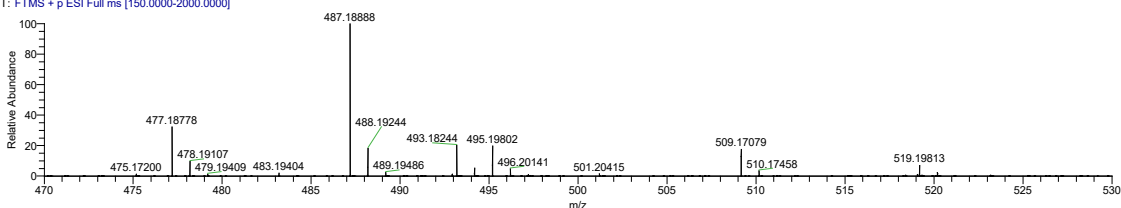

Elemental composition search on mass 487.19

m/z= 482.19-492.19

Isotope Min Max

N-14 0 10

O-16 0 10

C-12 0 100

H-1 0 200

Charge 1

Mass tolerance 5.00 ppm

Nitrogen rule not used

RDB equiv -1.00-100.00

max results 50

| m/z       | Theo. Mass       | Delta (ppm)  | RDB equiv. | Composition                                                    |
|-----------|------------------|--------------|------------|----------------------------------------------------------------|
| 487.18882 | 487.18904        | -0.46        | 21.0       | C <sub>31</sub> H <sub>25</sub> O <sub>3</sub> N <sub>3</sub>  |
|           | <u>487.18955</u> | <u>-1.50</u> | <u>8.5</u> | <u>C<sub>17</sub>H<sub>27</sub>O<sub>9</sub>N<sub>8</sub></u>  |
|           | 487.18770        | 2.30         | 21.5       | C <sub>29</sub> H <sub>23</sub> O <sub>2</sub> N <sub>6</sub>  |
|           | 487.19039        | -3.21        | 20.5       | C <sub>33</sub> H <sub>27</sub> O <sub>4</sub>                 |
|           | 487.19089        | -4.26        | 8.0        | C <sub>19</sub> H <sub>29</sub> O <sub>10</sub> N <sub>5</sub> |

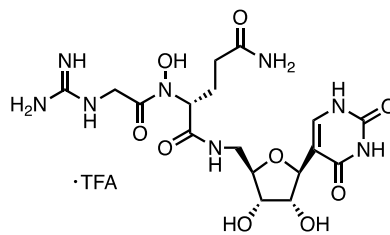

**epi-1**

Sample No. : C:\Xcalibur\...BG\_212114\_8\_65\_MP\_pn  
 Operator name : Yamashita Nao  
 Date : 02/03/22 16:13:36  
 Instrumental method : C:\Xcalibur\methods\ESI\_100ul\S60\_100ul\_mz150\_2000pn.meth

Instrument : Exactive Plus

Mobile phase solvent : MeOH  
 Sample solvent : MeOH

Instrumental Analysis Division, Global Facility Center, Creative Research Institution, Hokkaido University

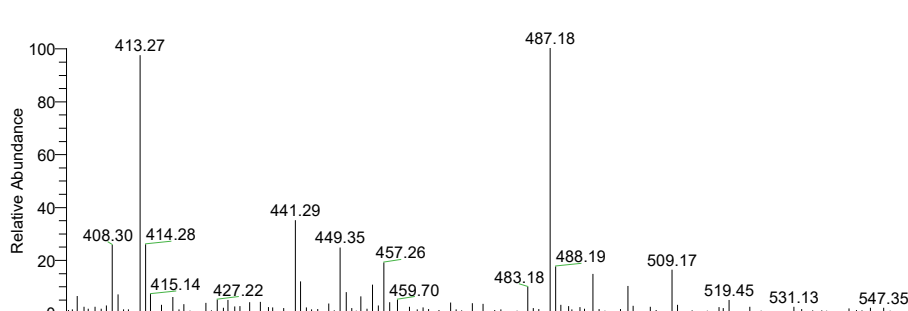

NL: 1.28E7  
 BG\_212114\_8\_65\_MP\_pn#19-33 RT:  
 0.30-0.50 AV: 8 T:  
 FTMS + c ESI Full ms  
 [150.00-2000.00]

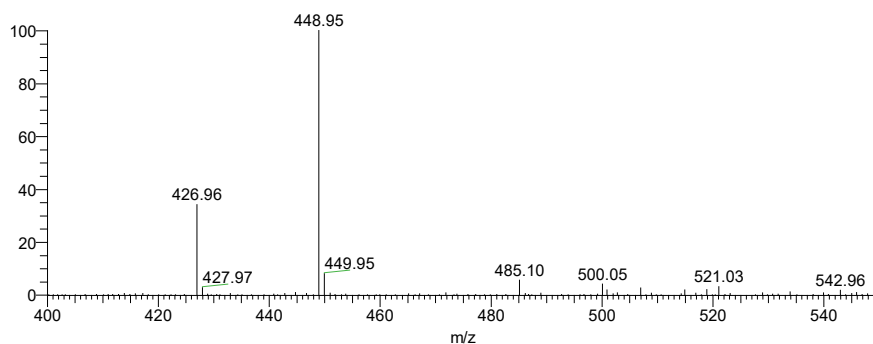

NL: 2.16E7  
 BG\_212114\_8\_65\_MP\_pn#19-33 RT:  
 0.31-0.48 AV: 7 T:  
 FTMS - c ESI Full ms  
 [150.00-2000.00]

Sample No. : C:\Xcalibur\...0203\212114\_8\_65\_MP\_pn  
 Operator name : Yamashita Nao  
 Date : 02/03/22 16:02:36  
 Instrumental method : C:\Xcalibur\methods\ESI\_100ul\S60\_100ul\_mz150\_2000pn.meth

Instrument : Exactive Plus

Mobile phase solvent : MeOH  
 Sample solvent : MeOH

Instrumental Analysis Division, Global Facility Center, Creative Research Institution, Hokkaido University

212114\_8\_65\_MP\_pn#19-23 RT: 0.30-0.36 AV: 3 NL: 2.71E6  
 T: FTMS + p ESI Full ms [150.0000-2000.0000]

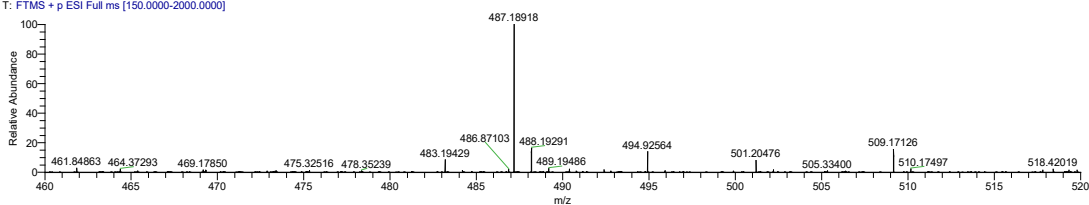

212114\_8\_65\_MP\_pn#23-26 RT: 0.36-0.38 AV: 2 NL: 4.80E6  
 T: FTMS + p ESI Full ms [150.0000-2000.0000]

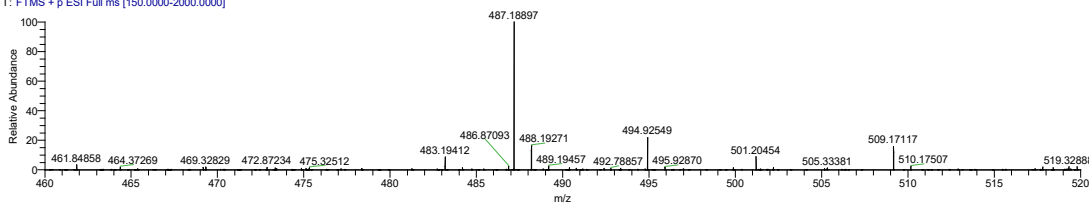

212114\_8\_65\_MP\_pn#26-30 RT: 0.41-0.44 AV: 2 NL: 3.51E6  
 T: FTMS + p ESI Full ms [150.0000-2000.0000]

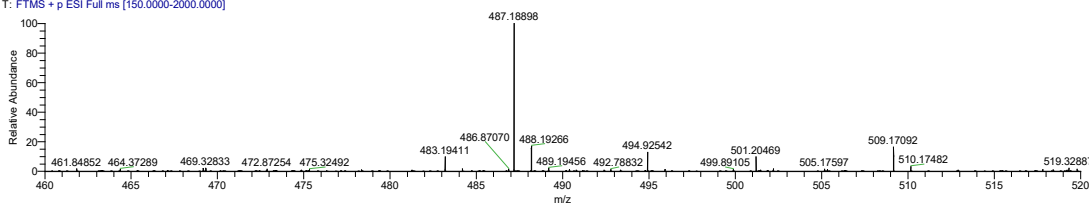

Elemental composition search on mass 487.19

m/z= 482.19-492.19

Isotope Min Max  
N-14 0 10  
O-16 0 10  
C-12 0 100  
H-1 0 200

Charge 1

Mass tolerance 5.00 ppm

Nitrogen rule not used

RDB equiv -1.00-100.00

max results 50

| m/z       | Theo. Mass | Delta (ppm) | RDB equiv. | Composition                                                    |
|-----------|------------|-------------|------------|----------------------------------------------------------------|
| 487.18897 | 487.18904  | -0.15       | 21.0       | C <sub>31</sub> H <sub>25</sub> O <sub>3</sub> N <sub>3</sub>  |
|           | 487.18955  | -1.19       | 8.5        | C <sub>17</sub> H <sub>27</sub> O <sub>9</sub> N <sub>8</sub>  |
|           | 487.18770  | 2.61        | 21.5       | C <sub>29</sub> H <sub>23</sub> O <sub>2</sub> N <sub>6</sub>  |
|           | 487.19039  | -2.91       | 20.5       | C <sub>33</sub> H <sub>27</sub> O <sub>4</sub>                 |
|           | 487.19089  | -3.95       | 8.0        | C <sub>19</sub> H <sub>29</sub> O <sub>10</sub> N <sub>5</sub> |

## 8) The IR spectrum of isocyanide (10)

ピーク検出 - Memory-2

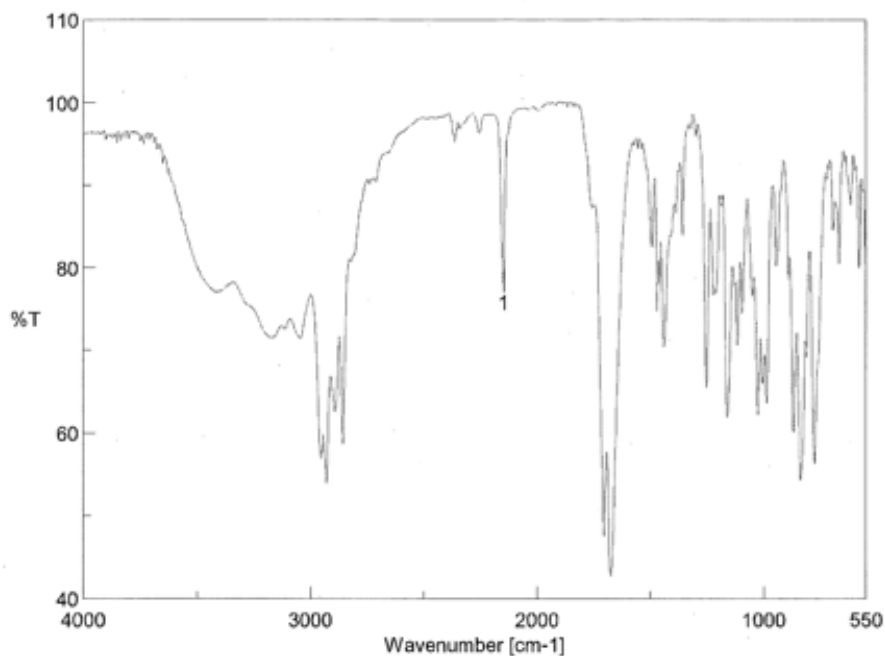

[コメント情報]

試料名 17OKW-pseudoU-isocyanide  
 コメント NaCl  
 測定者 Ryotaro Okawa  
 所属 北海道大学  
 会社

[データ情報]

作成日時 2022/01/28 15:17  
 更新日時 2022/01/28 15:25

[測定情報]

機種名 FT/IR-4100typeA  
 シリアル番号 B066661016

データタイプ 等間隔データ  
 横軸 Wavenumber [cm-1]  
 縦軸 %T  
 スタート 549.613 cm-1  
 エンド 4000.6 cm-1  
 データ間隔 0.964233 cm-1  
 データ数 3580

測定日時 2022/01/28 15:11  
 光源 標準光源  
 検出器 TGS  
 積算回数 100  
 分解 4 cm-1  
 ゼロフィリング On  
 アボダイゼーション Cosine  
 ゲイン Auto (4)  
 アパーチャー Auto (7.1 mm)  
 スキャンスピード Auto (2 mm/sec)  
 フィルタ Auto (30000 Hz)

[ピーク検出結果]

| No. | 位置      | 強度      | No. | 位置 | 強度 |
|-----|---------|---------|-----|----|----|
| 1   | 2146.38 | 78.4548 |     |    |    |
